# Supplementary material
Source: PubMed Central journal article supplement (PMC3480235)

*Supporting Information*

**Synthesis of a 35-Member Stereoisomer Library of Bistramide A: Evaluation of Effects on Actin State, Cell Cycle and Tumor Cell Growth.**

Iwona E. Wrona,<sup>†</sup> Jason T. Lowe,<sup>†</sup> Thomas J. Turbyville,<sup>‡</sup> Tanya R. Johnson,<sup>‡</sup> Julien Beignet,<sup>†</sup> John A. Beutler,<sup>‡</sup> and James S. Panek\*,<sup>†</sup>

*Department of Chemistry and Center for Chemical Methodology and Library Development (CMLD-BU), Boston University 590, Commonwealth Avenue, Boston, Massachusetts, 02215, and Molecular Targets Development Program National Cancer Institute at Frederick, Building 560-15, Frederick, Maryland, 21702*

<sup>1</sup>H and <sup>13</sup>C Spectra

Synthesis of a 35-Member Stereoisomer Library of Bistramide A: Evaluation of Effects on Actin State, Cell Cycle and Tumor Cell Growth

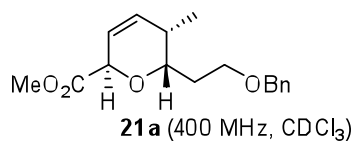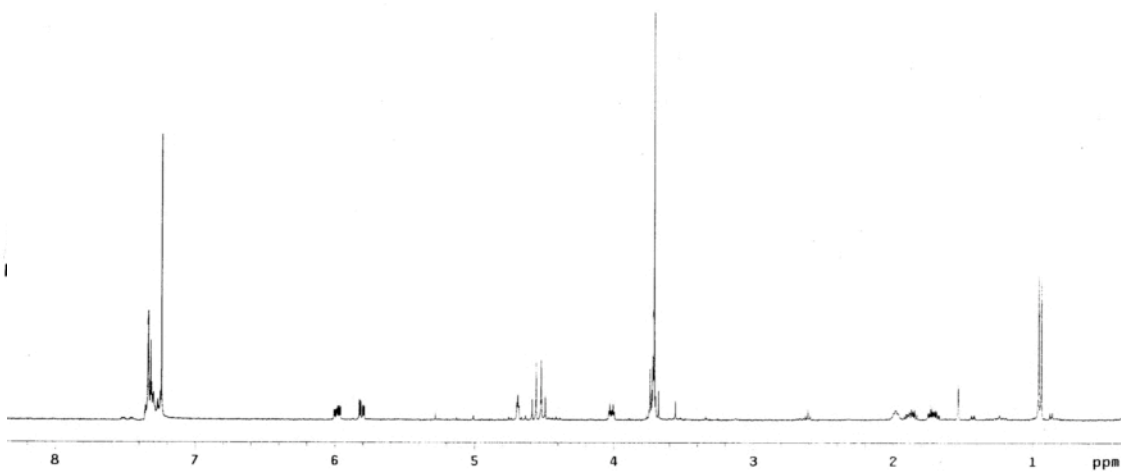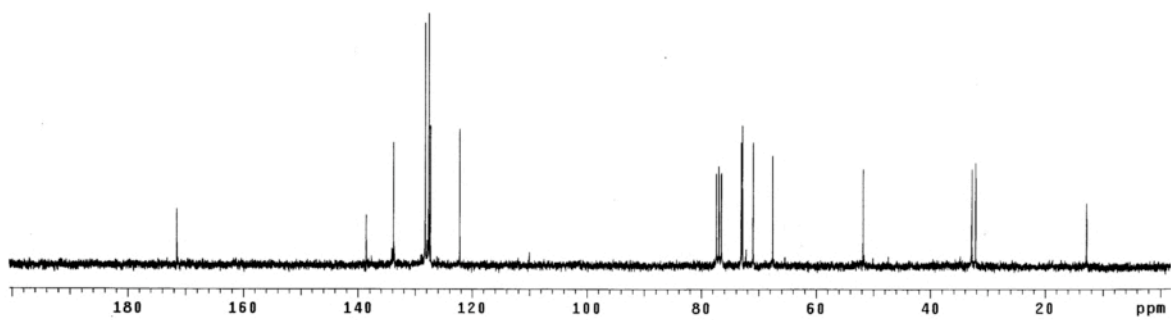

Synthesis of a 35-Member Stereoisomer Library of Bistramide A: Evaluation of Effects on Actin State, Cell Cycle and Tumor Cell Growth

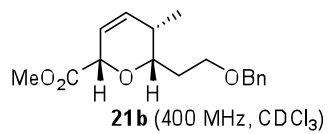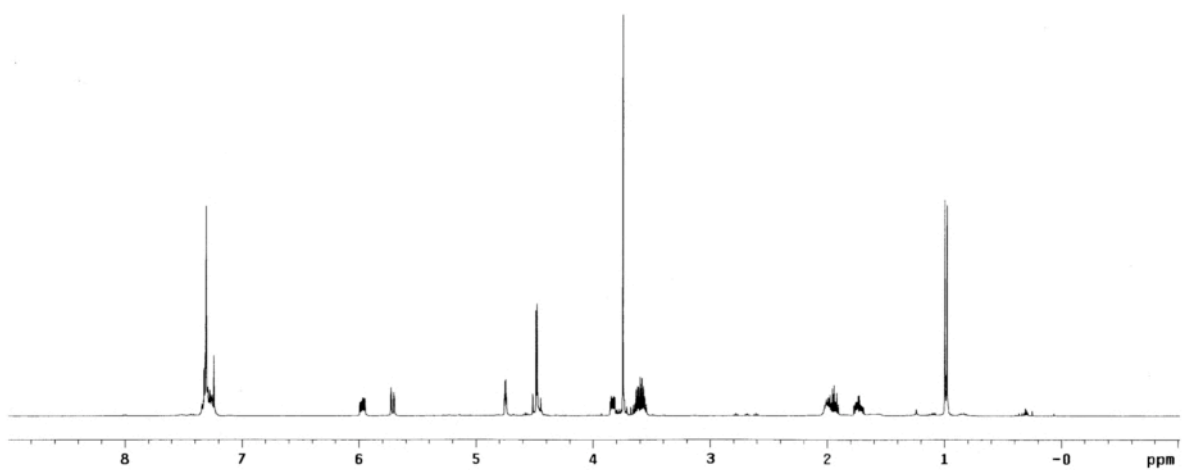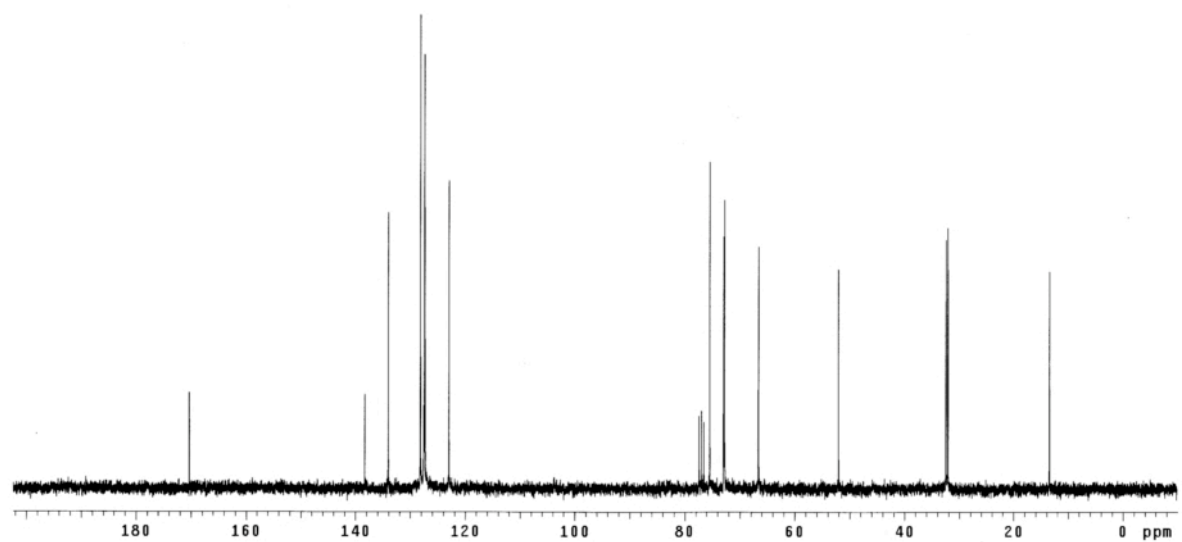

Synthesis of a 35-Member Stereoisomer Library of Bistramide A: Evaluation of Effects on Actin State, Cell Cycle and Tumor Cell Growth

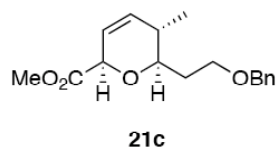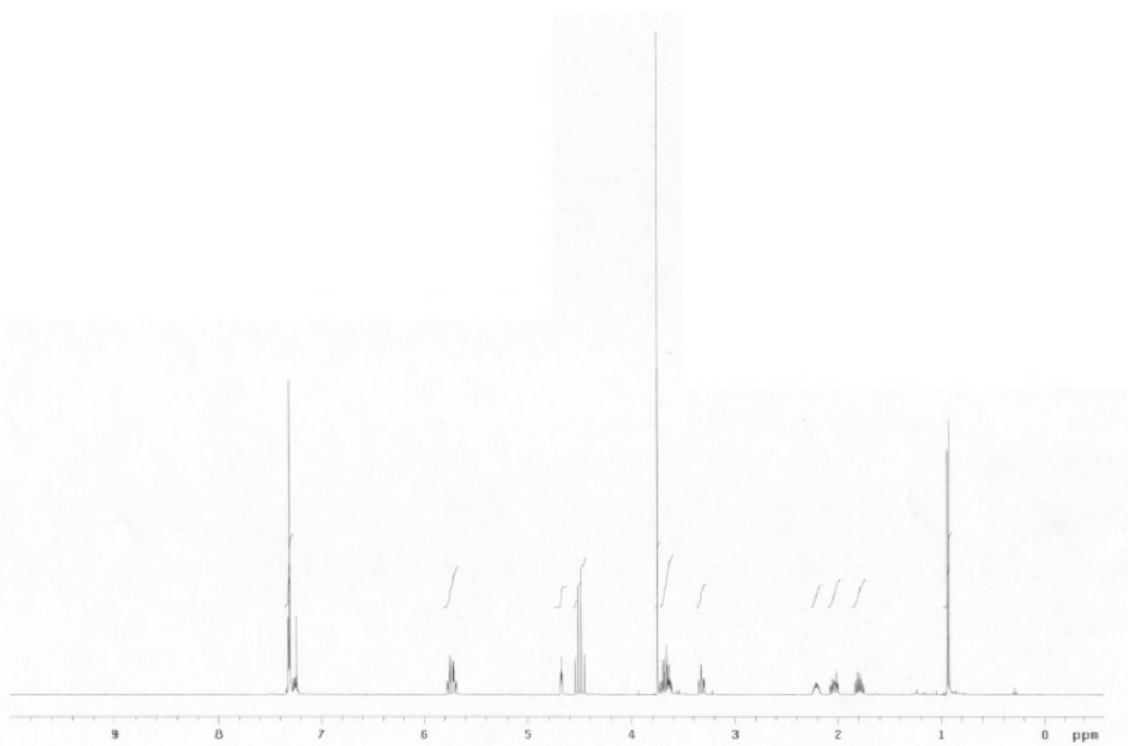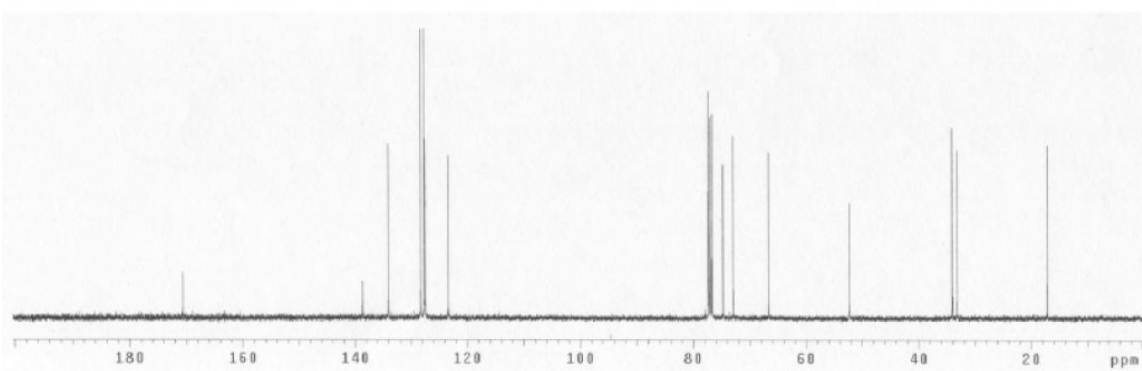

Synthesis of a 35-Member Stereoisomer Library of Bistramide A: Evaluation of Effects on Actin State, Cell Cycle and Tumor Cell Growth

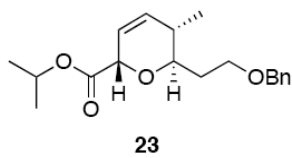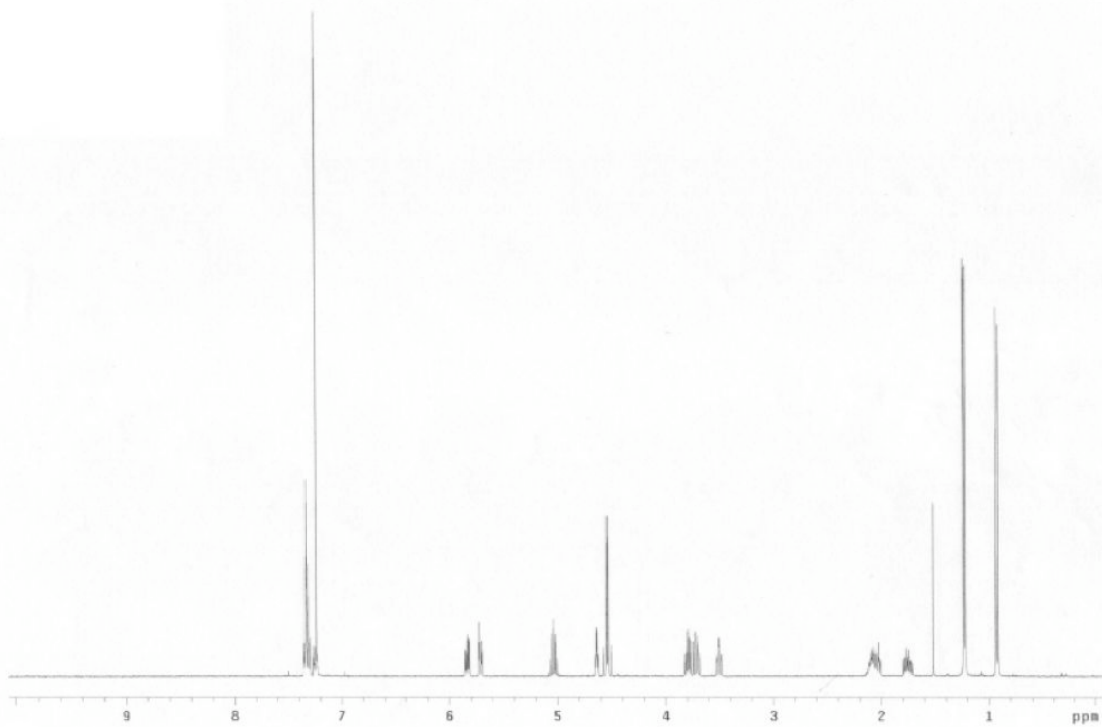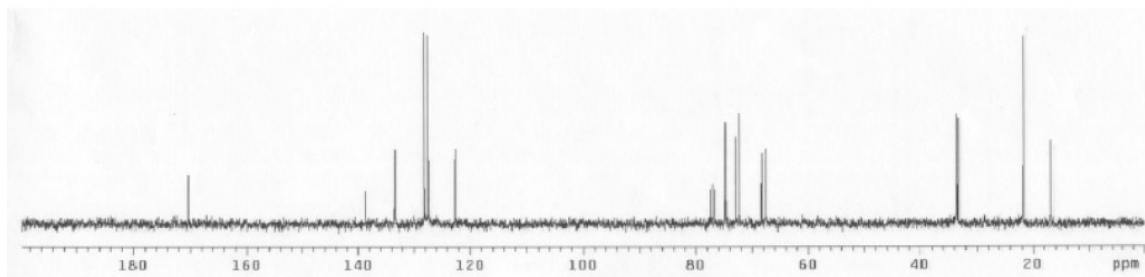

Synthesis of a 35-Member Stereoisomer Library of Bistramide A: Evaluation of Effects on Actin State, Cell Cycle and Tumor Cell Growth

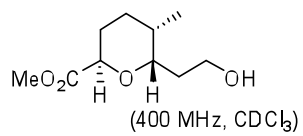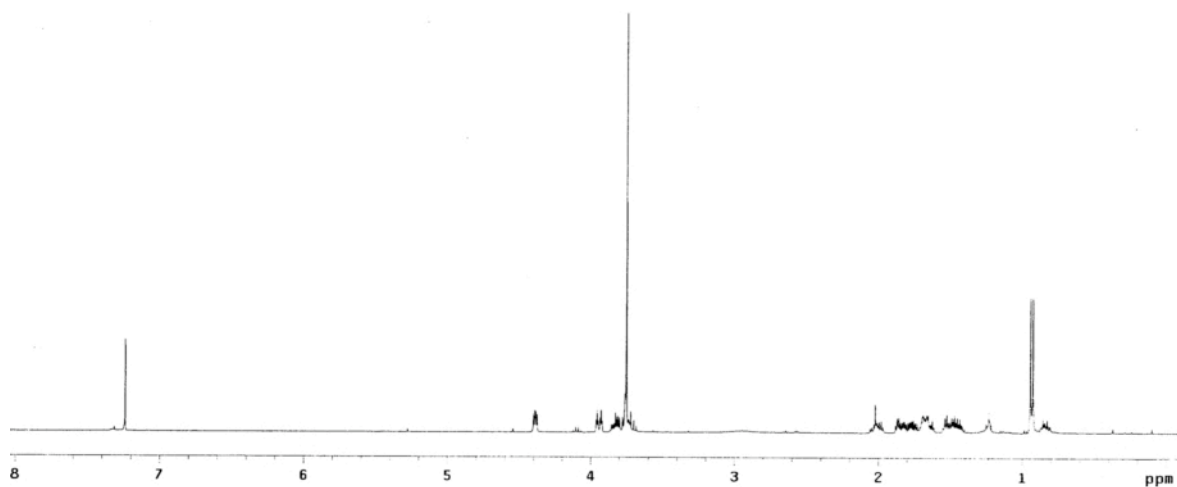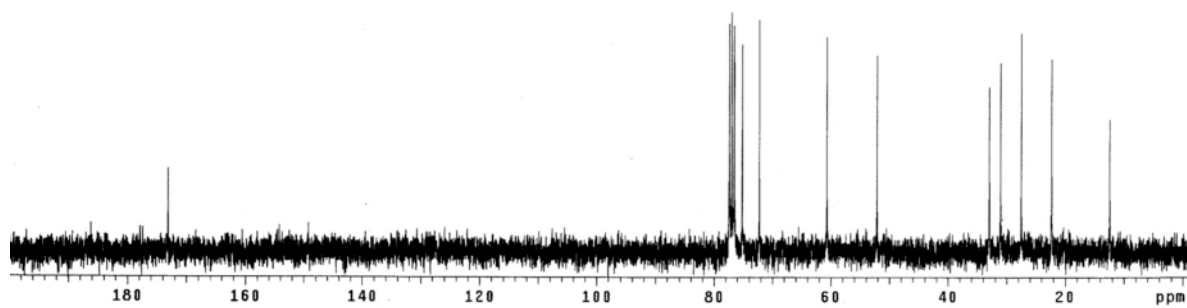

Synthesis of a 35-Member Stereoisomer Library of Bistramide A: Evaluation of Effects on Actin State, Cell Cycle and Tumor Cell Growth

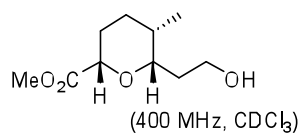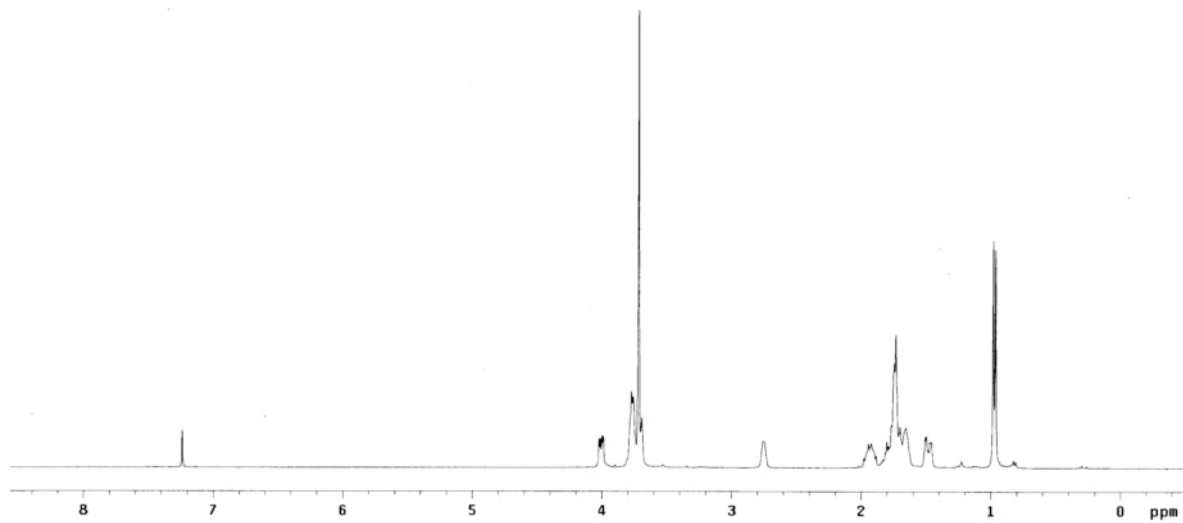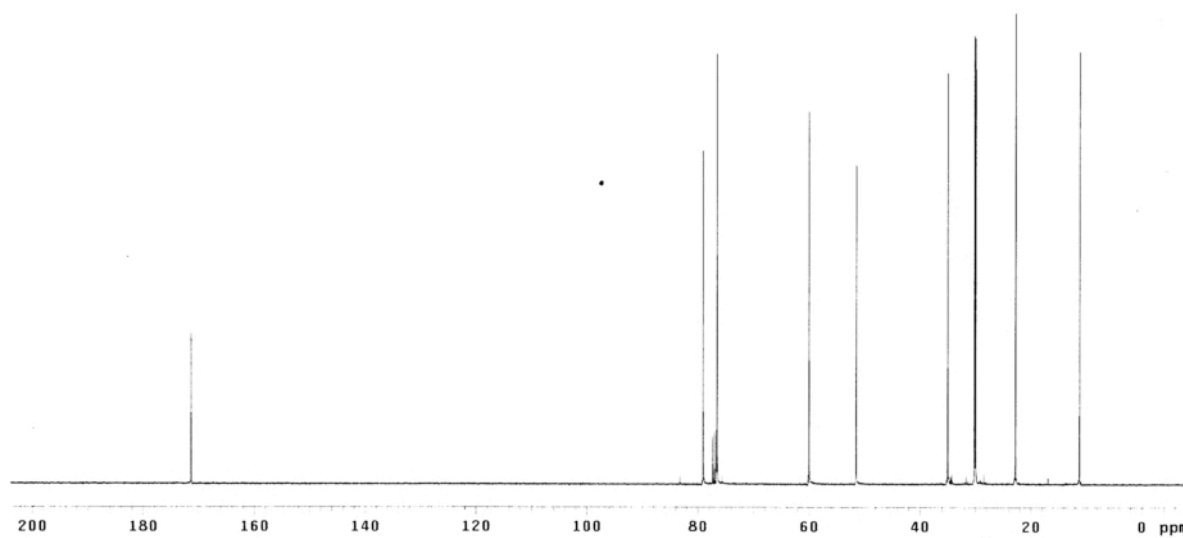

Synthesis of a 35-Member Stereoisomer Library of Bistramide A: Evaluation of Effects on Actin State, Cell Cycle and Tumor Cell Growth

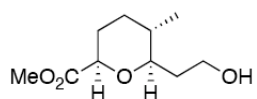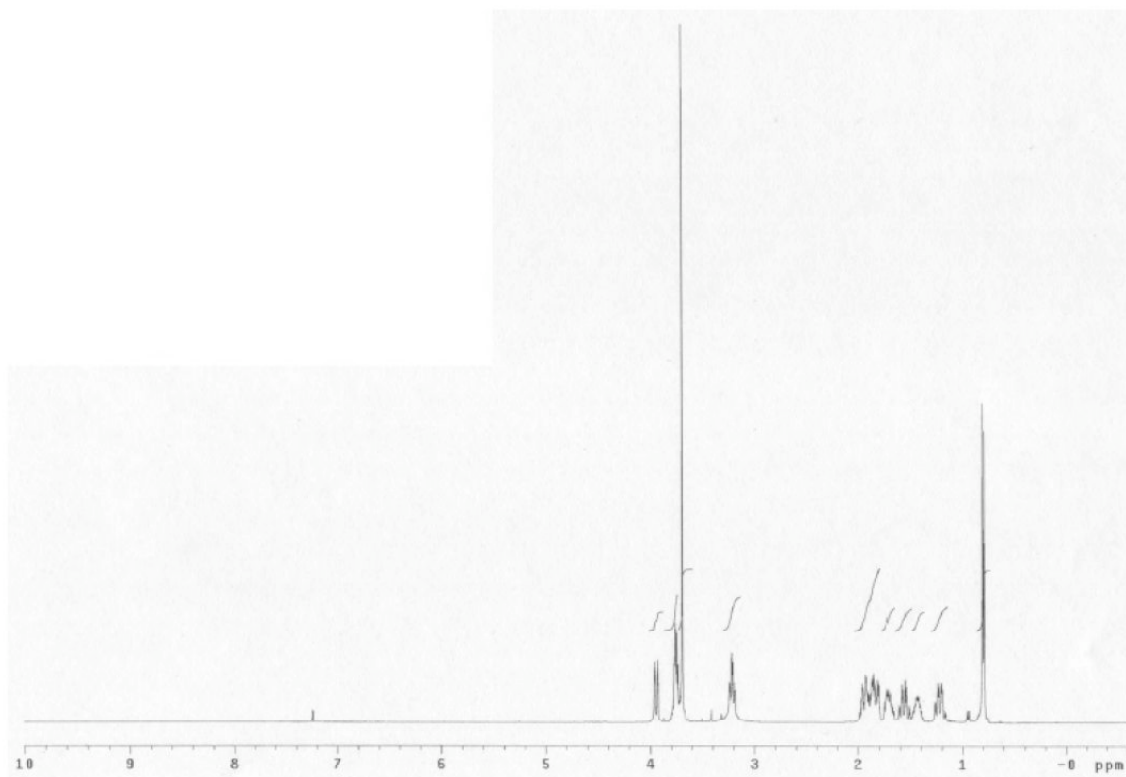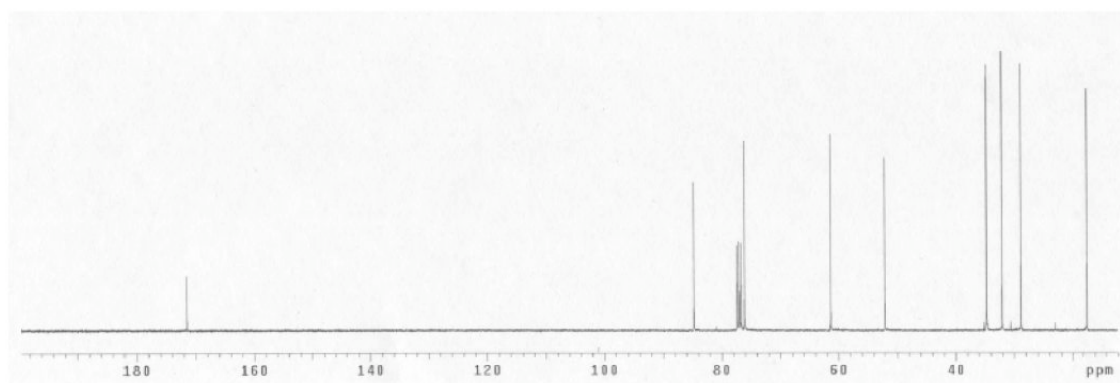



Synthesis of a 35-Member Stereoisomer Library of Bistramide A: Evaluation of Effects on Actin State, Cell Cycle and Tumor Cell Growth

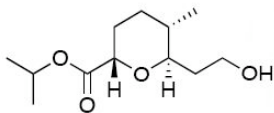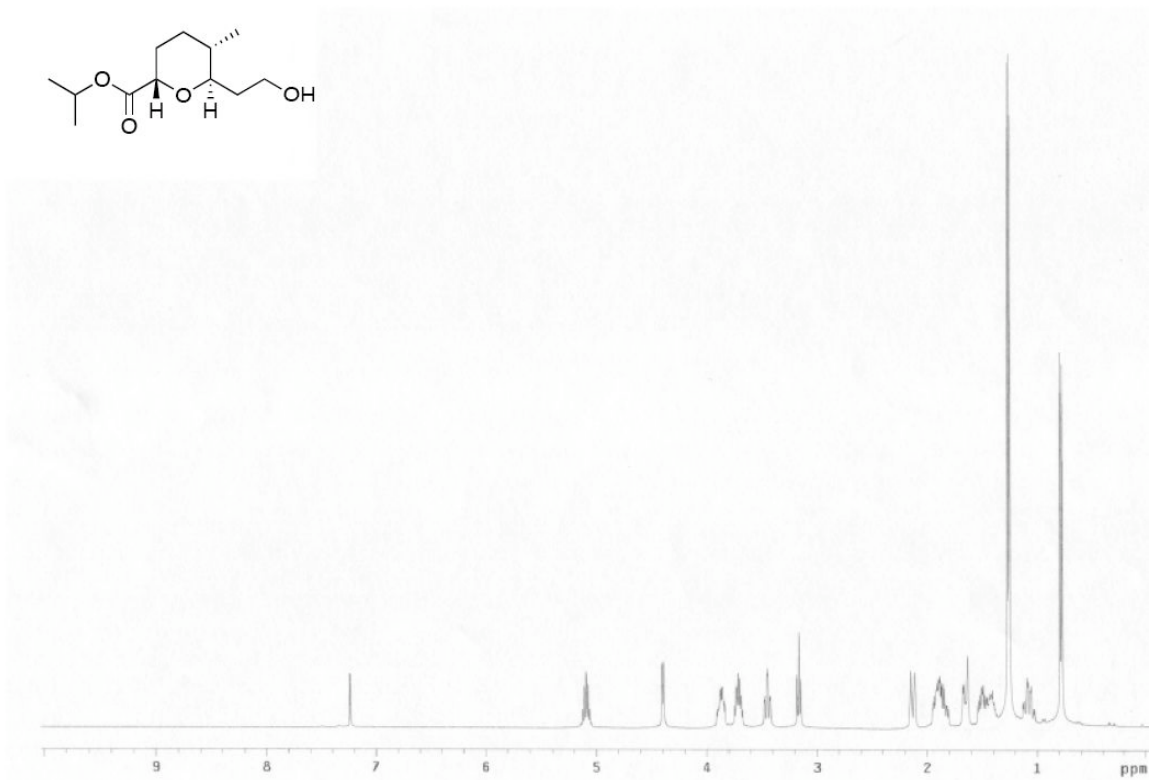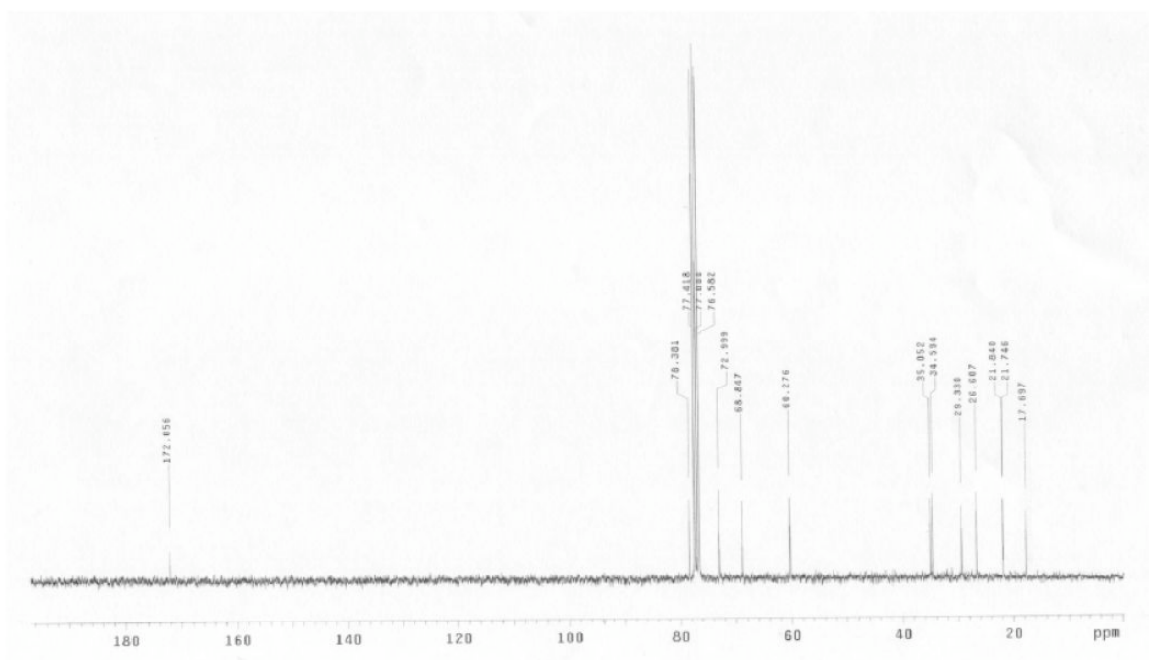

Synthesis of a 35-Member Stereoisomer Library of Bistramide A: Evaluation of Effects on Actin State, Cell Cycle and Tumor Cell Growth

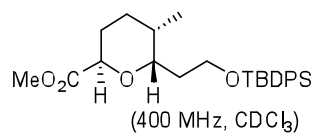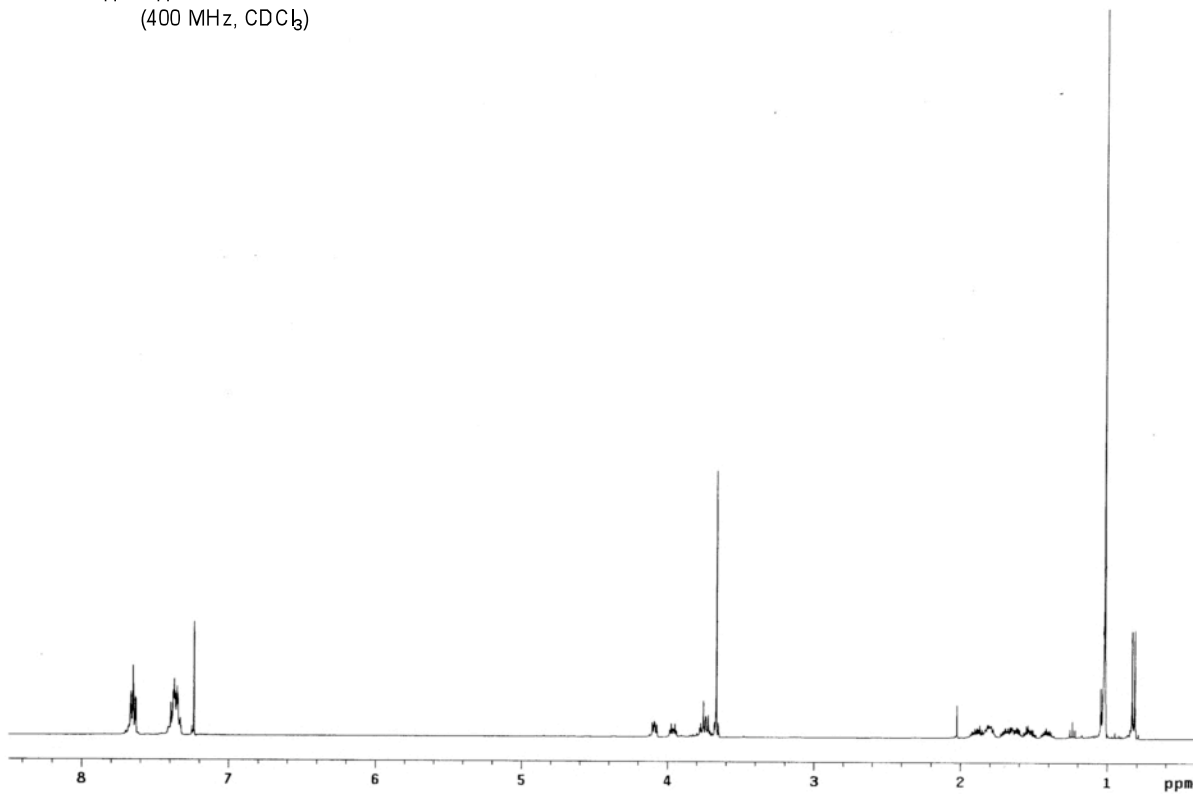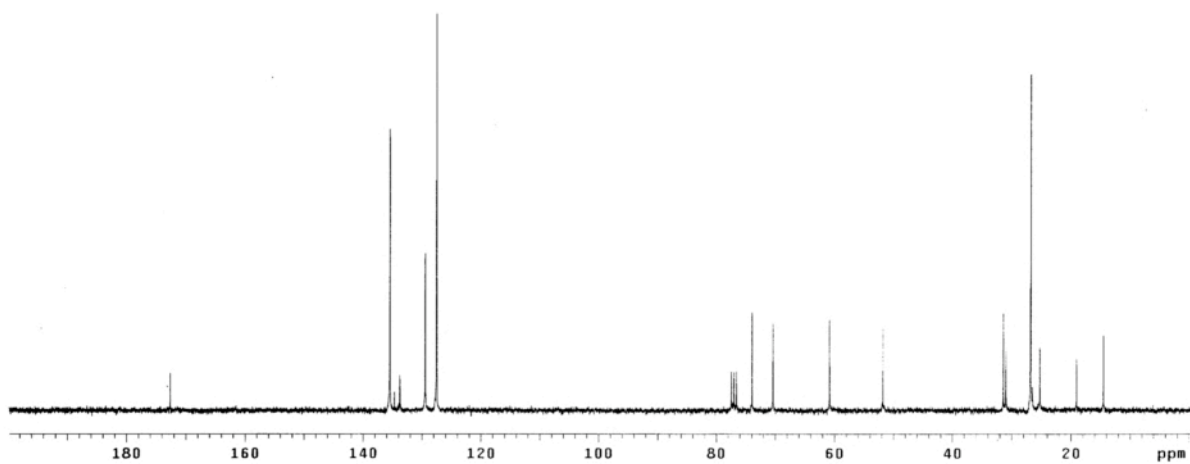

Synthesis of a 35-Member Stereoisomer Library of Bistramide A: Evaluation of Effects on Actin State, Cell Cycle and Tumor Cell Growth

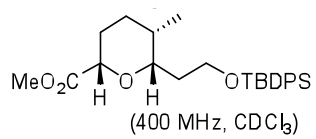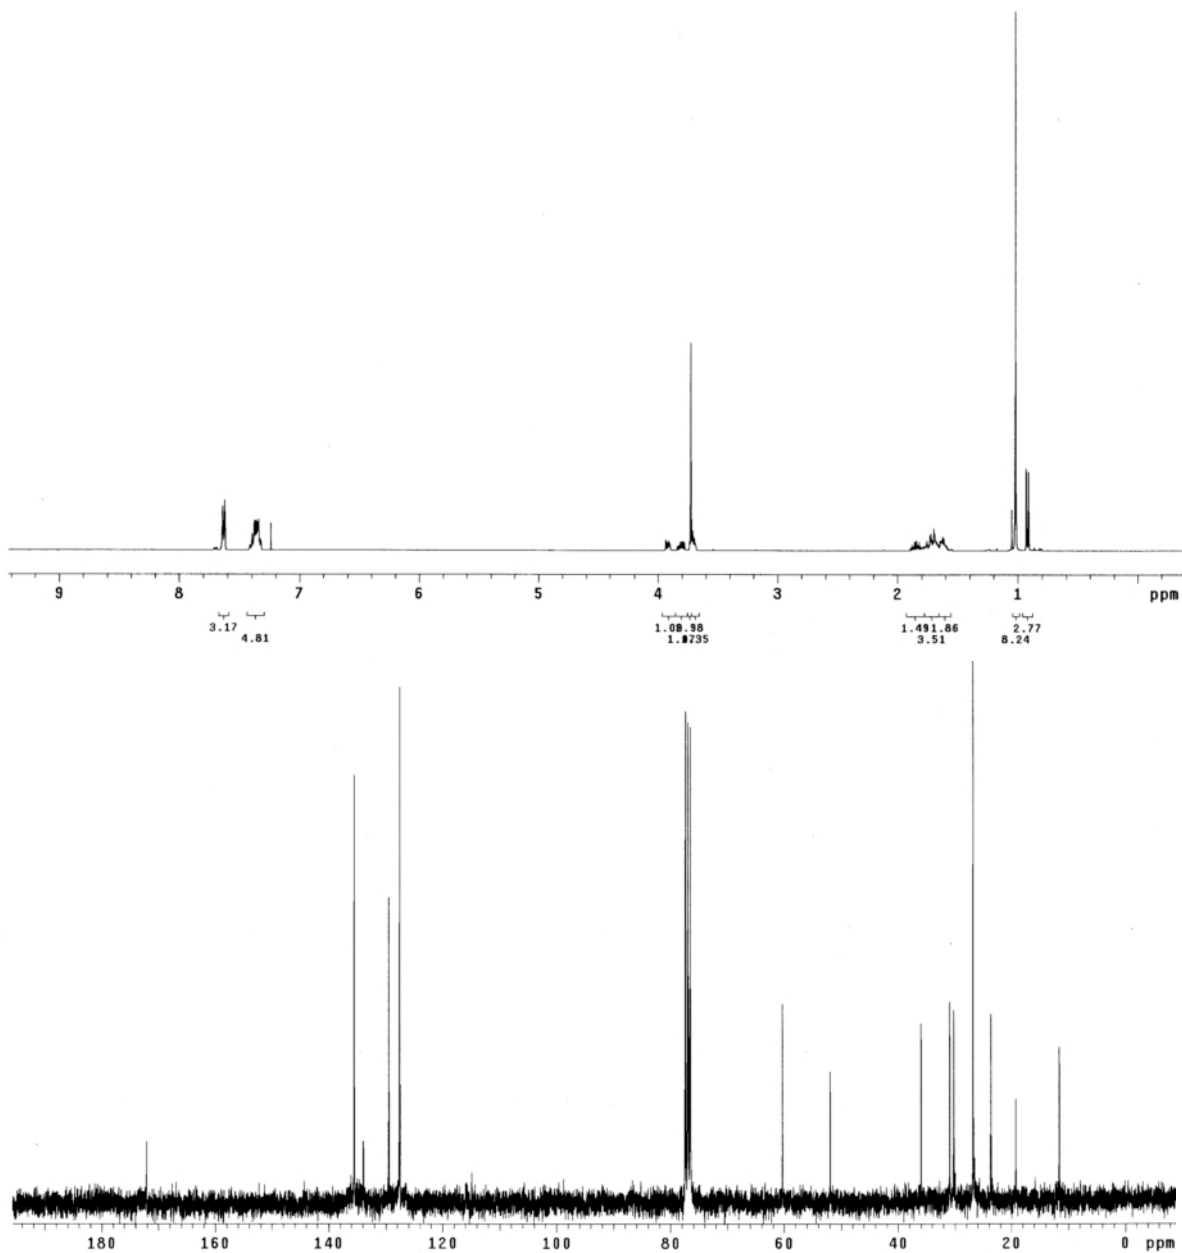





Synthesis of a 35-Member Stereoisomer Library of Bistramide A: Evaluation of Effects on Actin State, Cell Cycle and Tumor Cell Growth

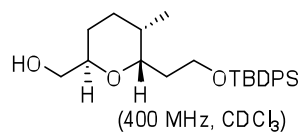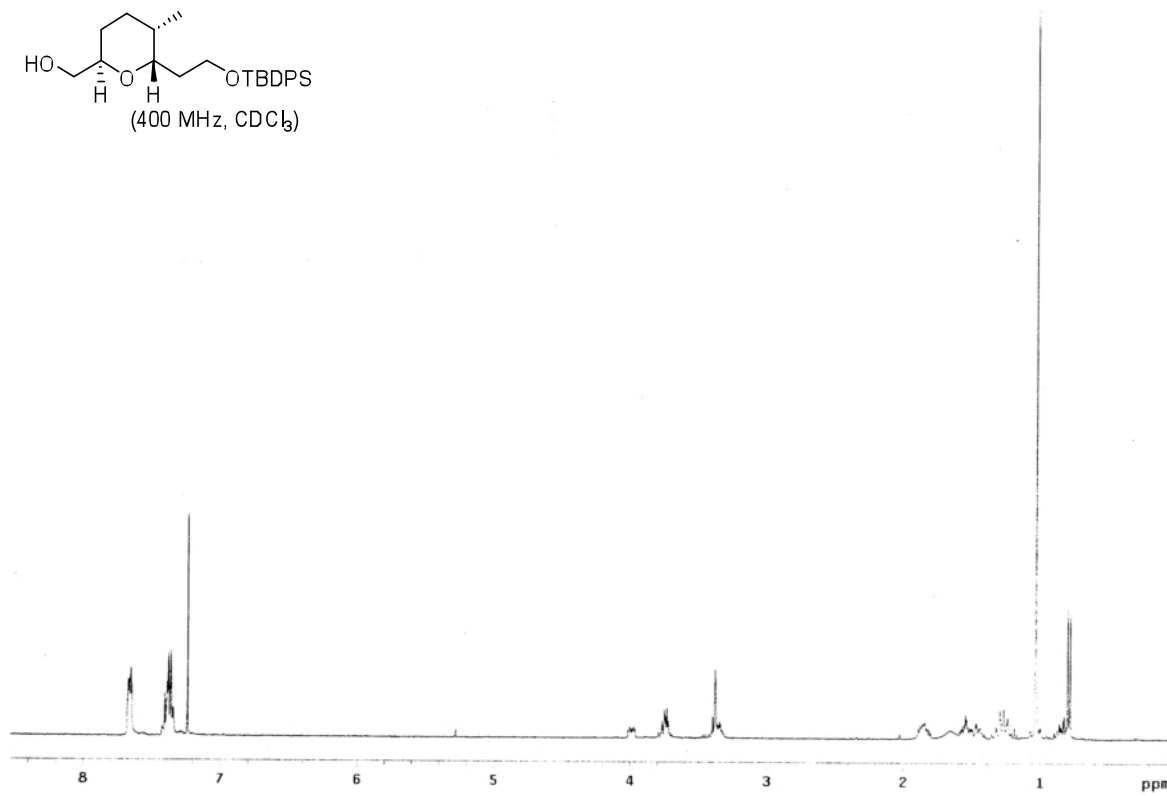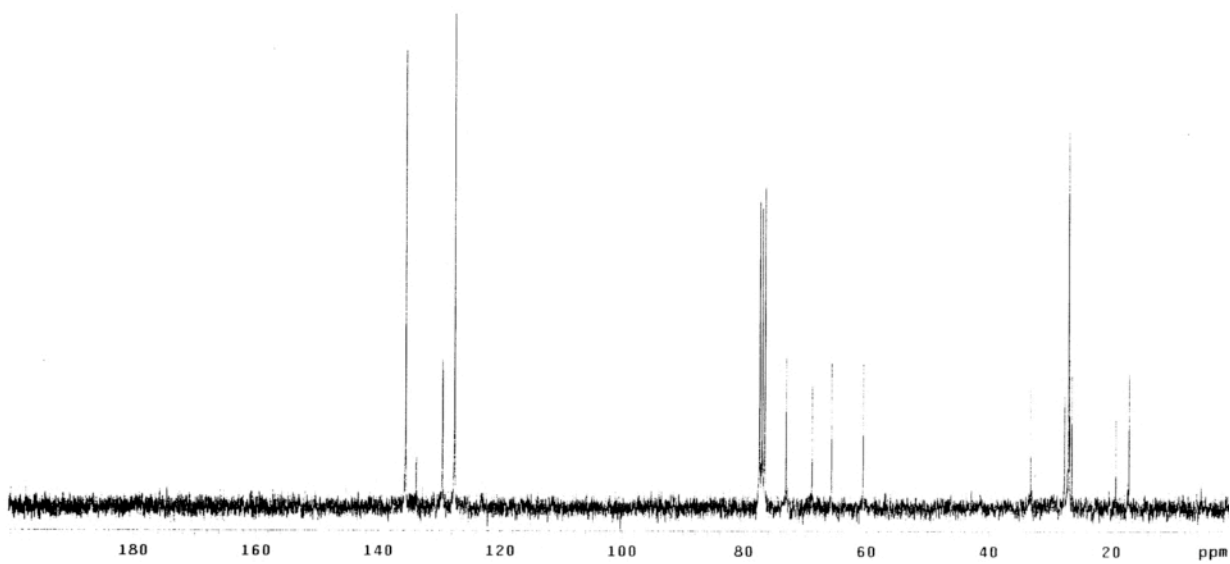

Synthesis of a 35-Member Stereoisomer Library of Bistramide A: Evaluation of Effects on Actin State, Cell Cycle and Tumor Cell Growth

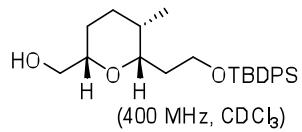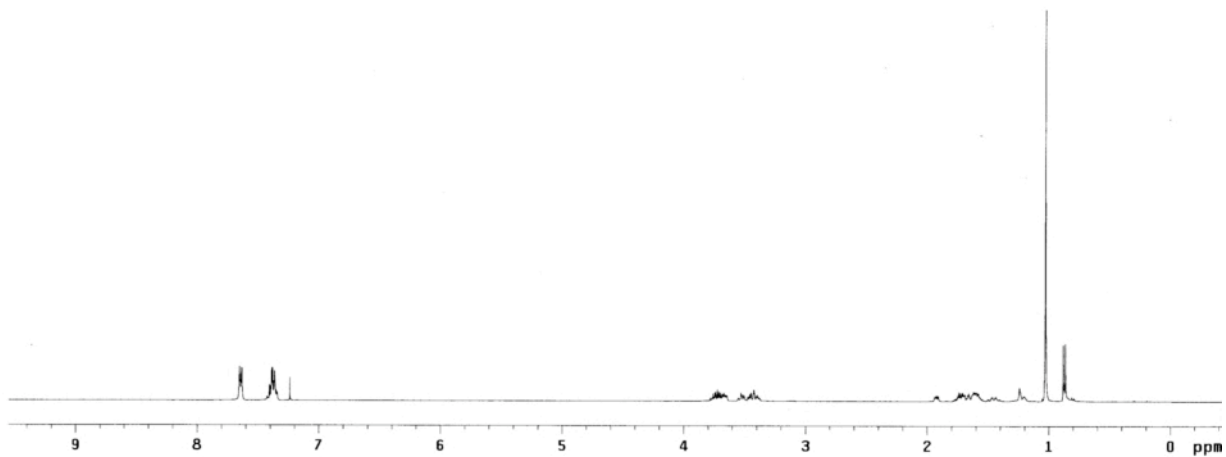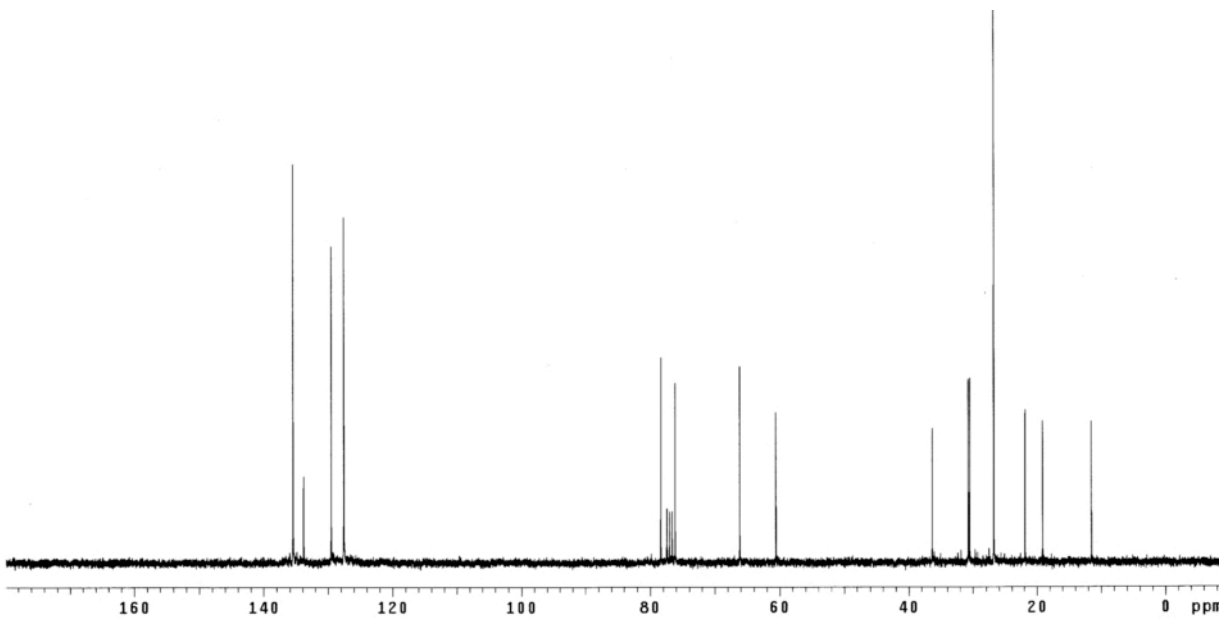

Synthesis of a 35-Member Stereoisomer Library of Bistramide A: Evaluation of Effects on Actin State, Cell Cycle and Tumor Cell Growth

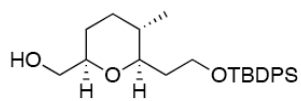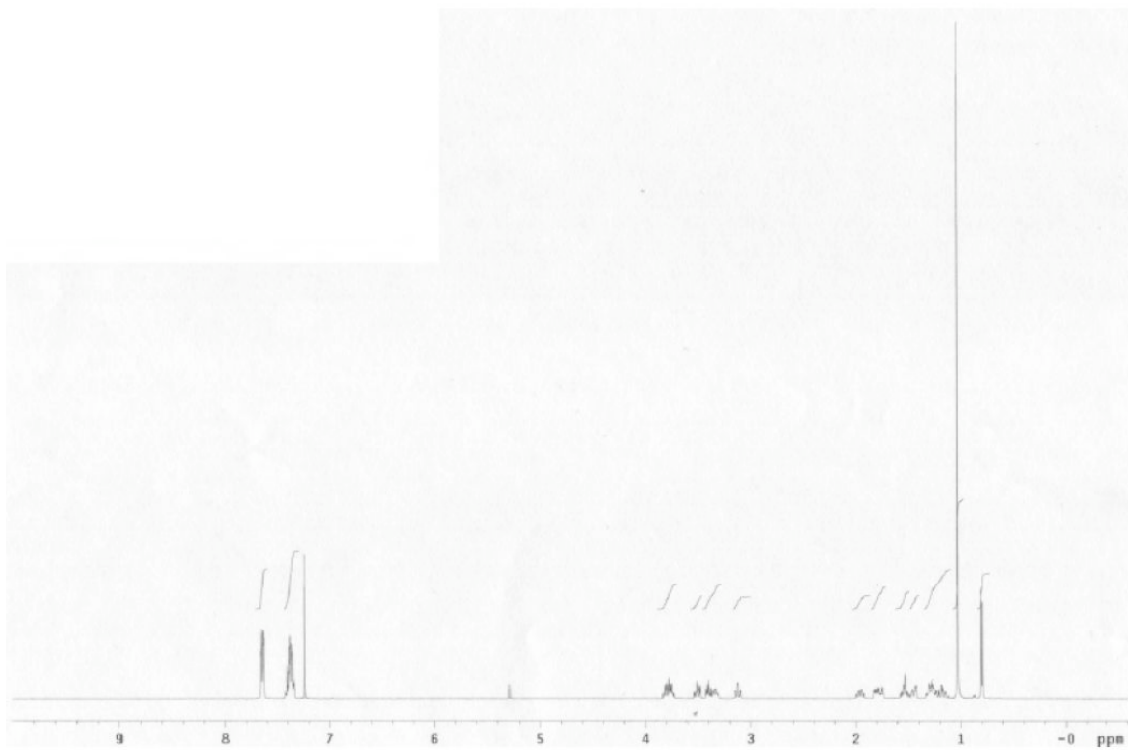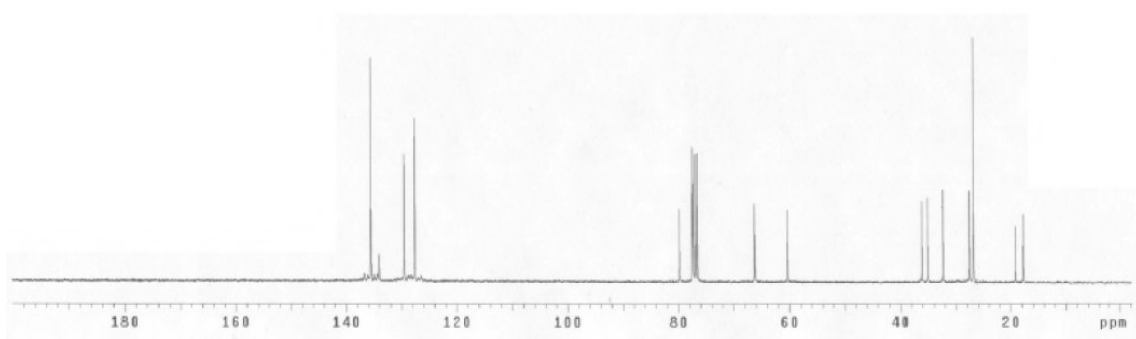



Synthesis of a 35-Member Stereoisomer Library of Bistramide A: Evaluation of Effects on Actin State, Cell Cycle and Tumor Cell Growth

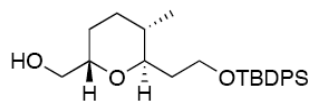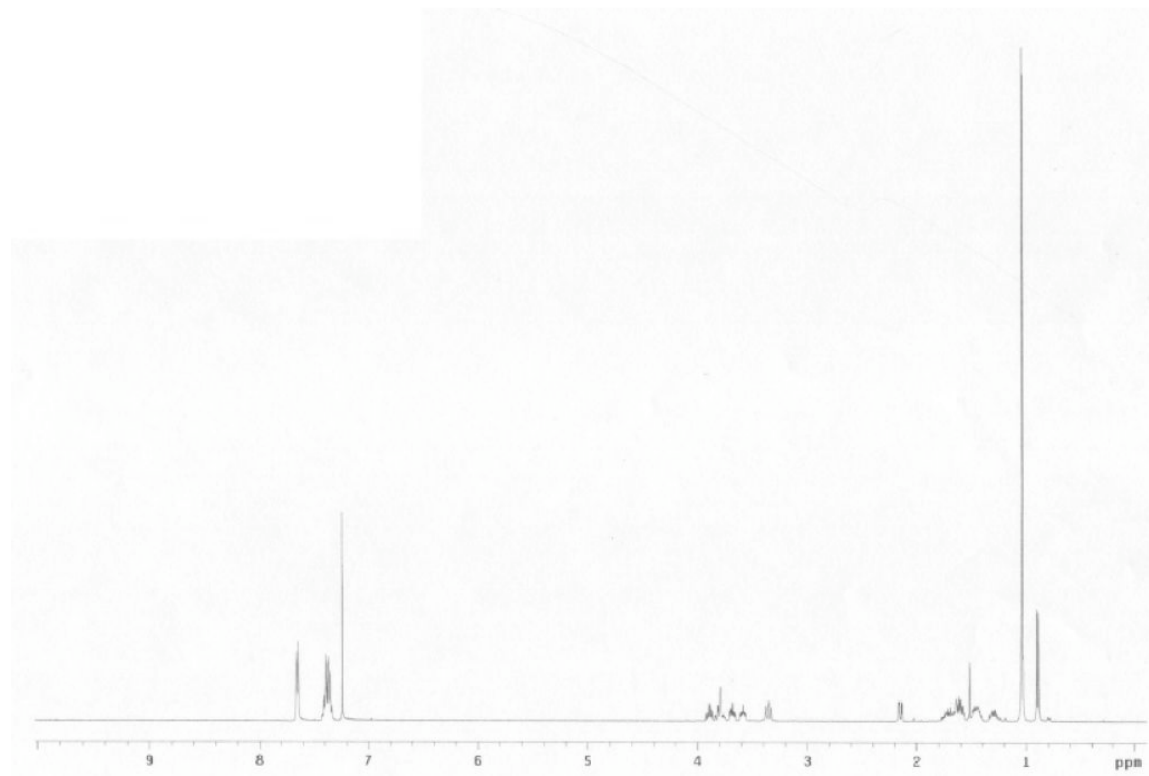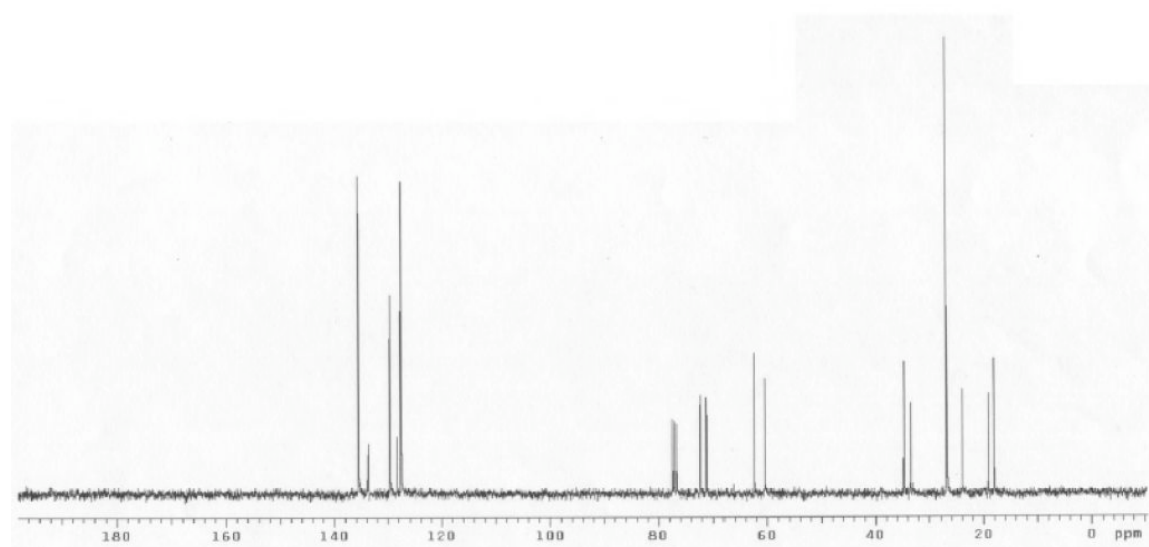

Synthesis of a 35-Member Stereoisomer Library of Bistramide A: Evaluation of Effects on Actin State, Cell Cycle and Tumor Cell Growth

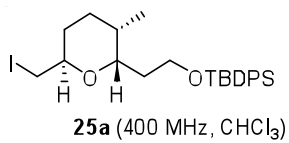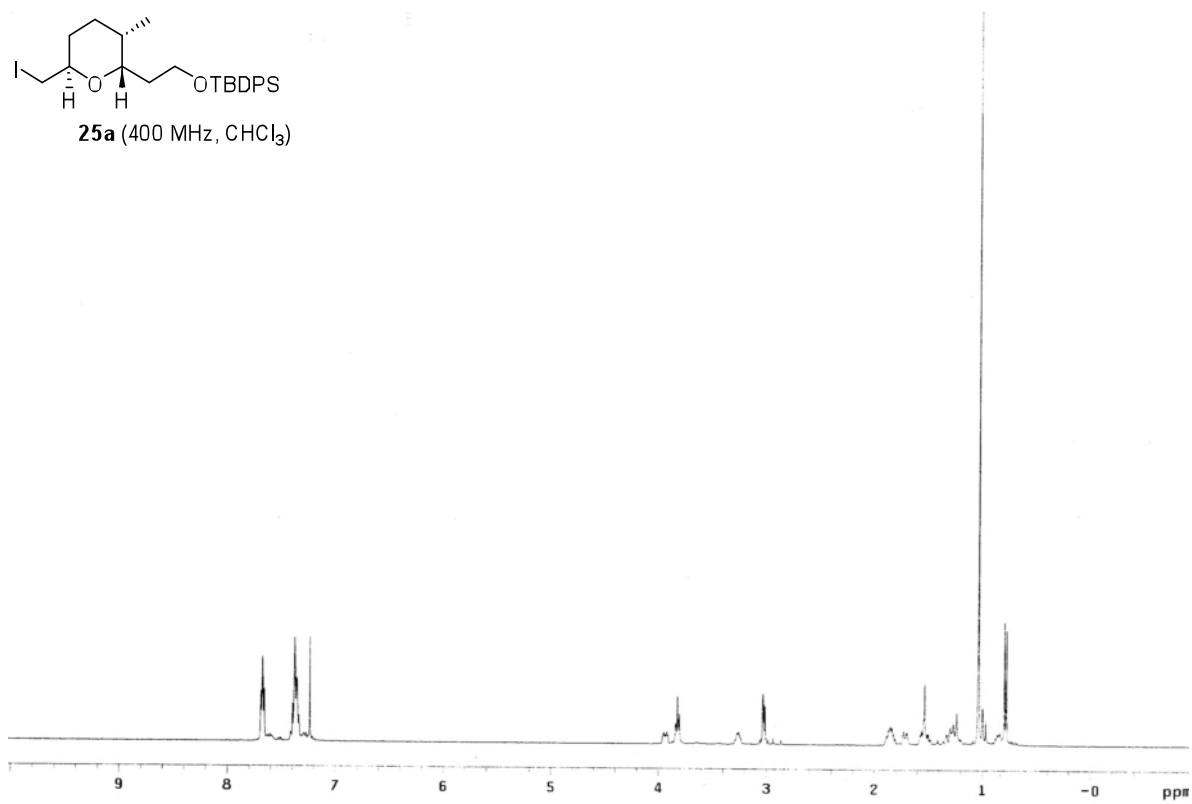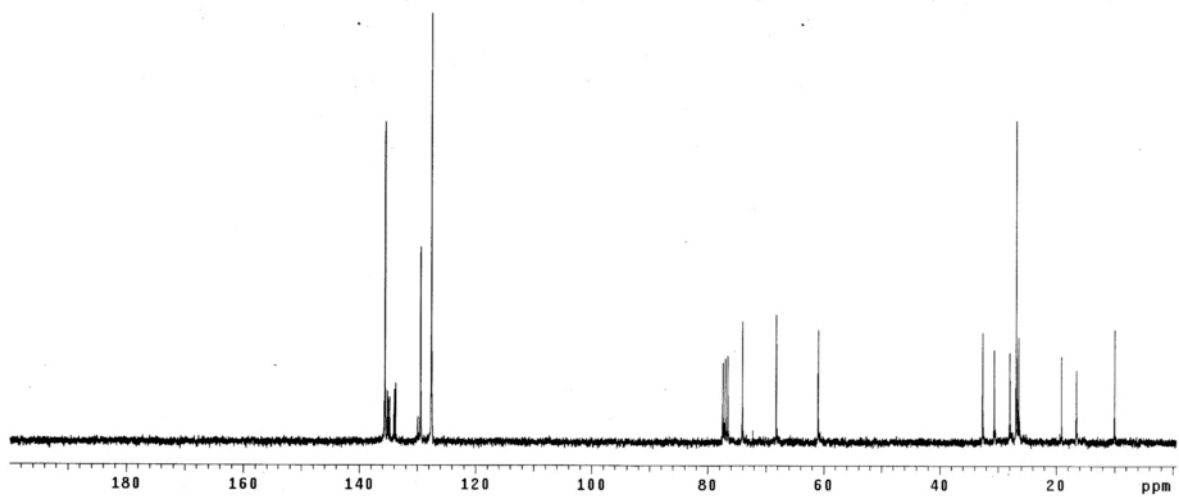

Synthesis of a 35-Member Stereoisomer Library of Bistramide A: Evaluation of Effects on Actin State, Cell Cycle and Tumor Cell Growth

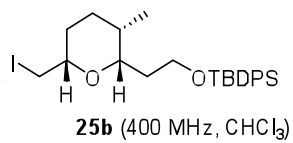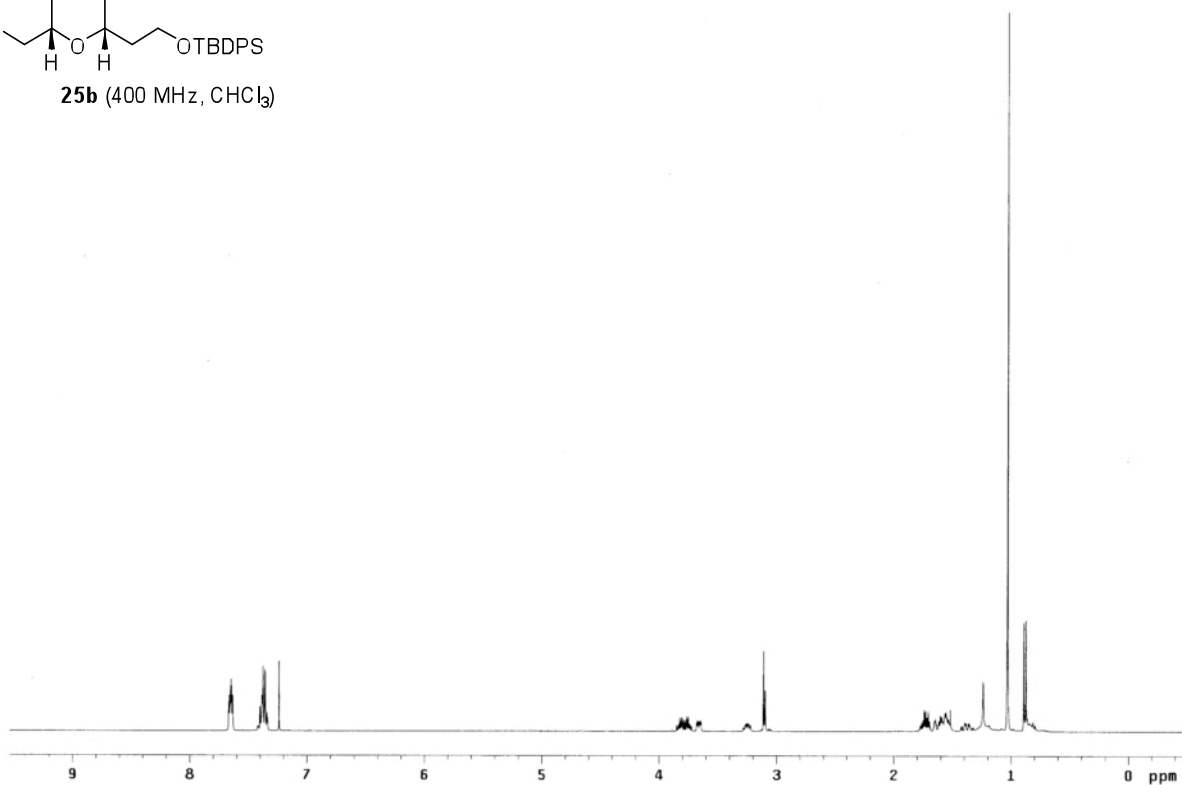

Synthesis of a 35-Member Stereoisomer Library of Bistramide A: Evaluation of Effects on Actin State, Cell Cycle and Tumor Cell Growth

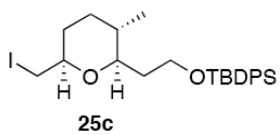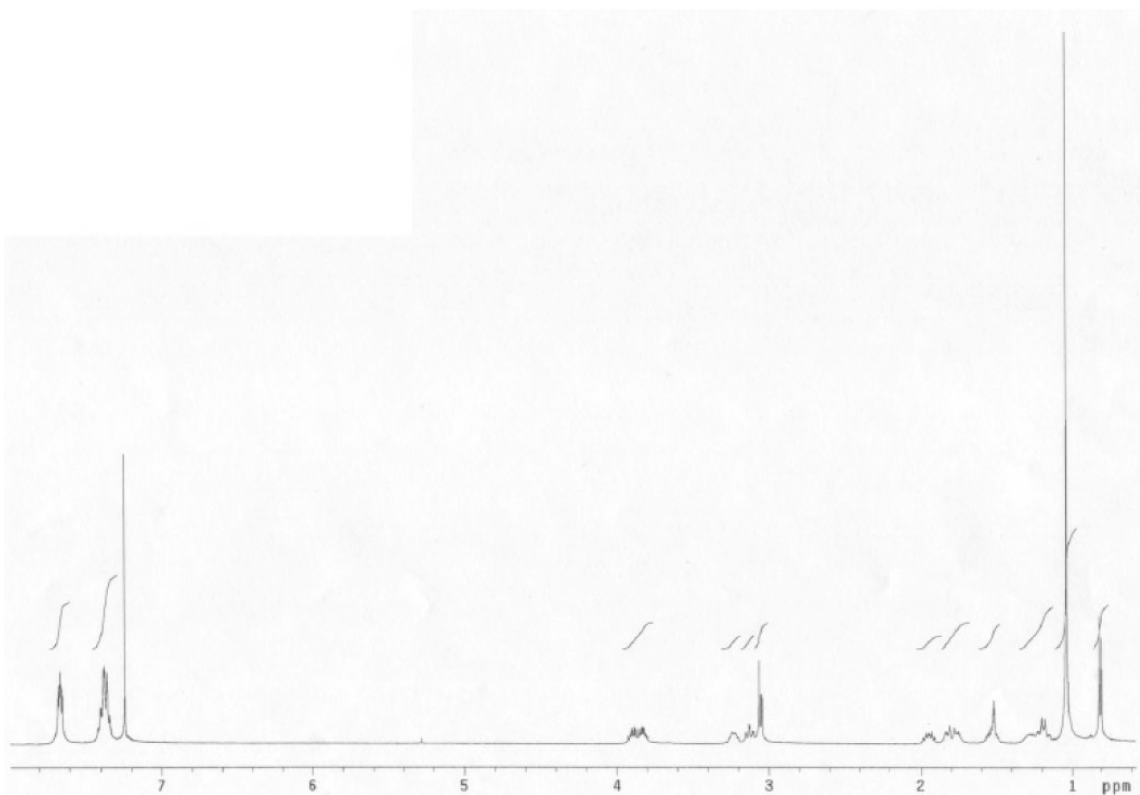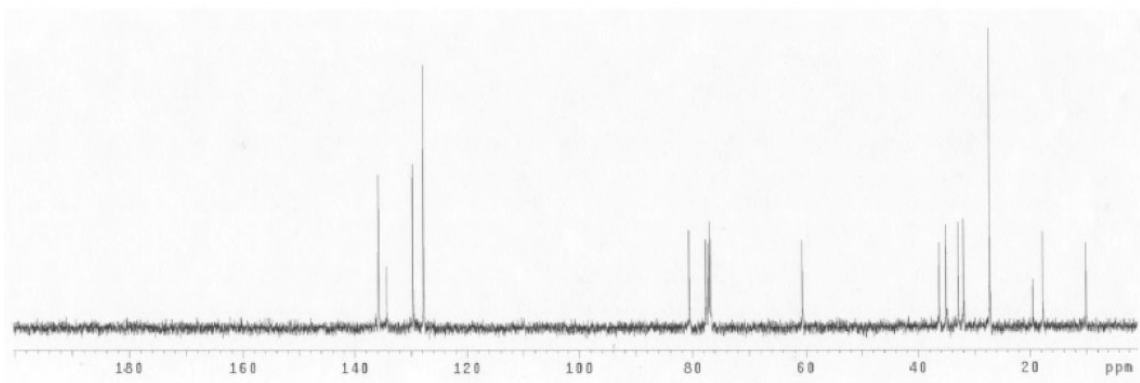



Synthesis of a 35-Member Stereoisomer Library of Bistramide A: Evaluation of Effects on Actin State, Cell Cycle and Tumor Cell Growth

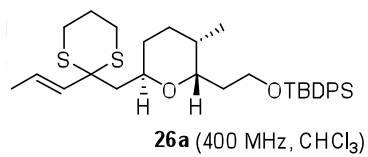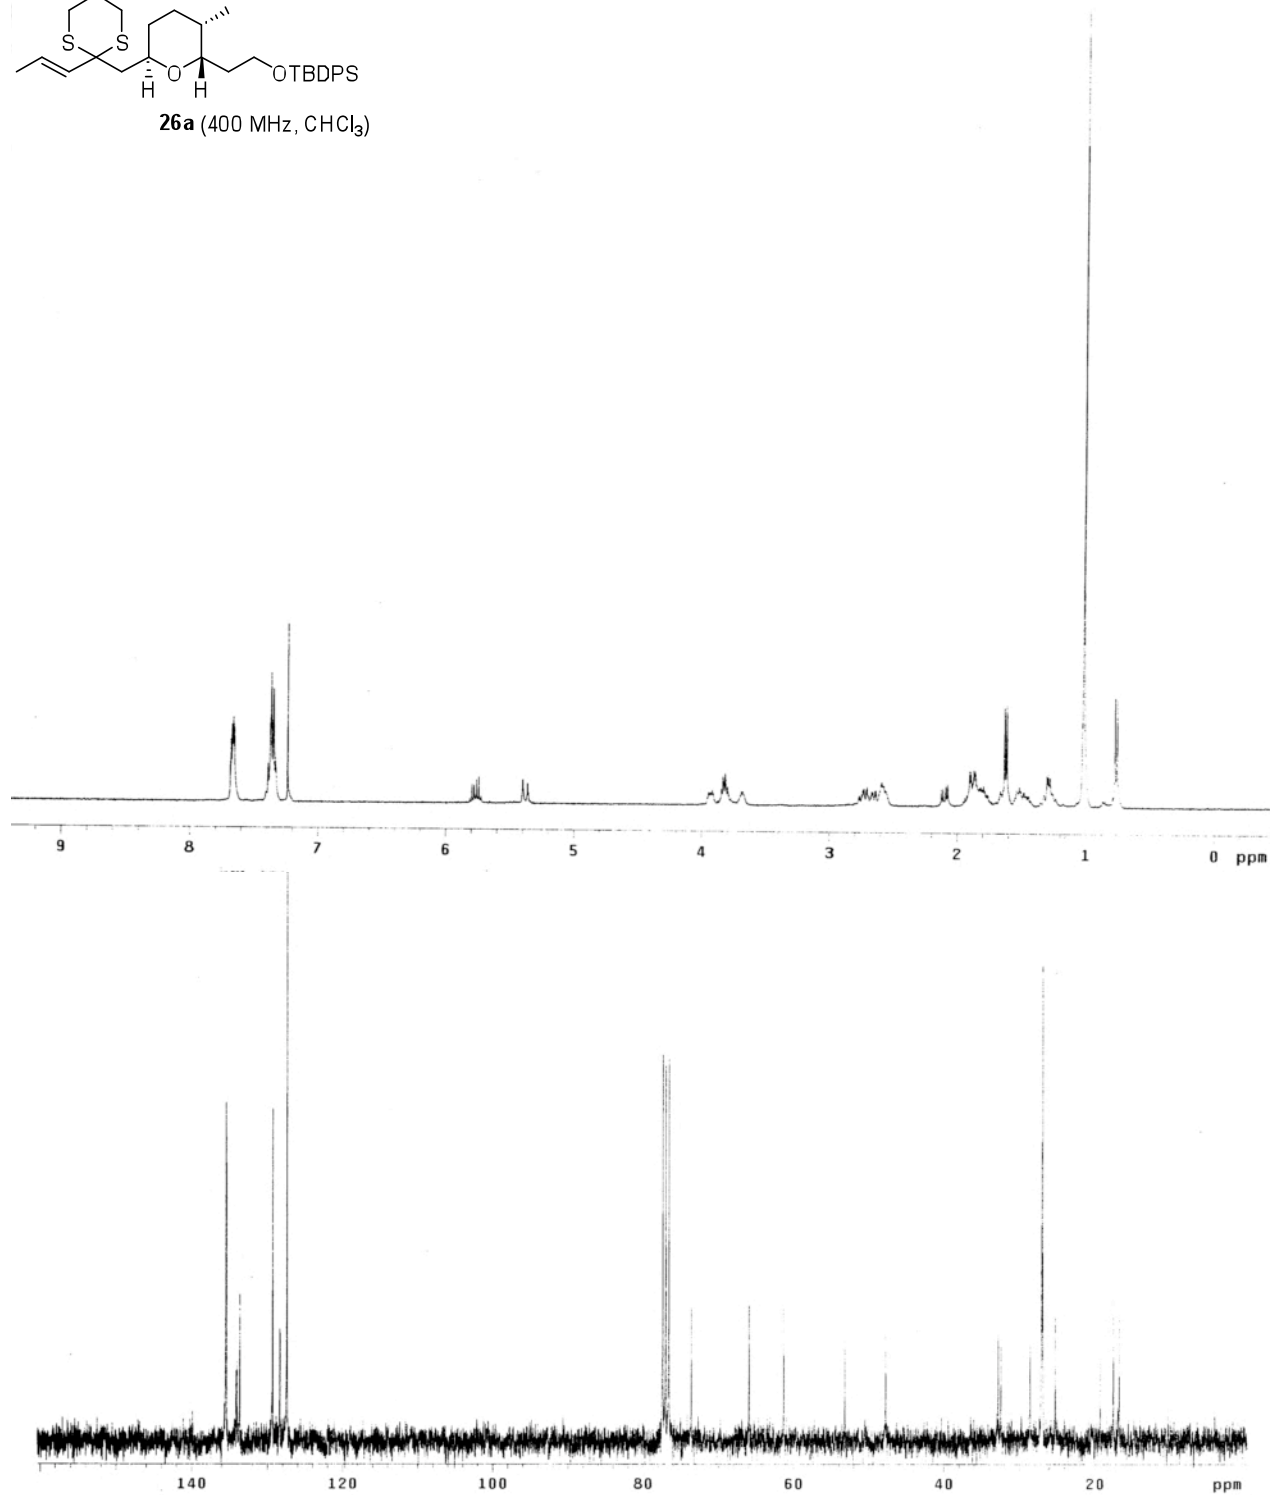

Synthesis of a 35-Member Stereoisomer Library of Bistramide A: Evaluation of Effects on Actin State, Cell Cycle and Tumor Cell Growth

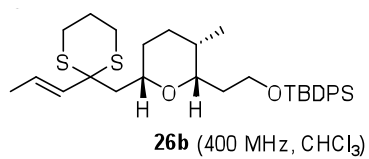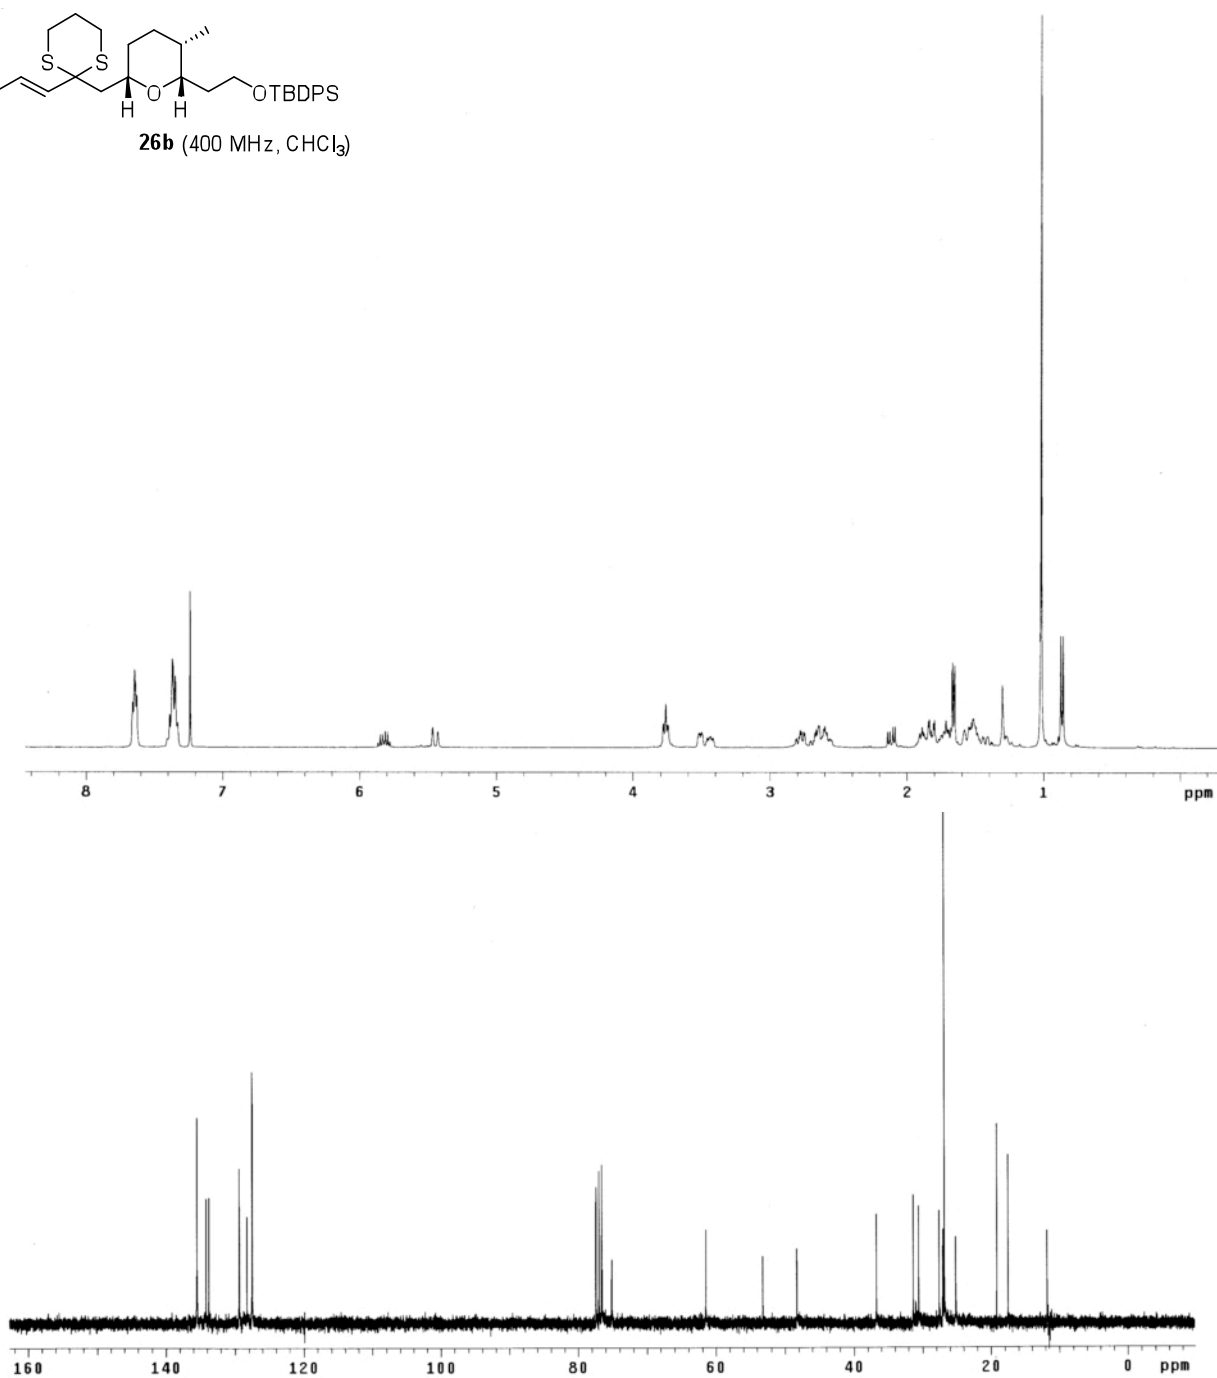

Synthesis of a 35-Member Stereoisomer Library of Bistramide A: Evaluation of Effects on Actin State, Cell Cycle and Tumor Cell Growth

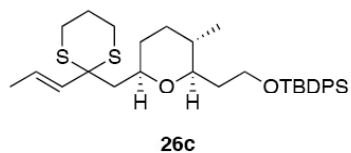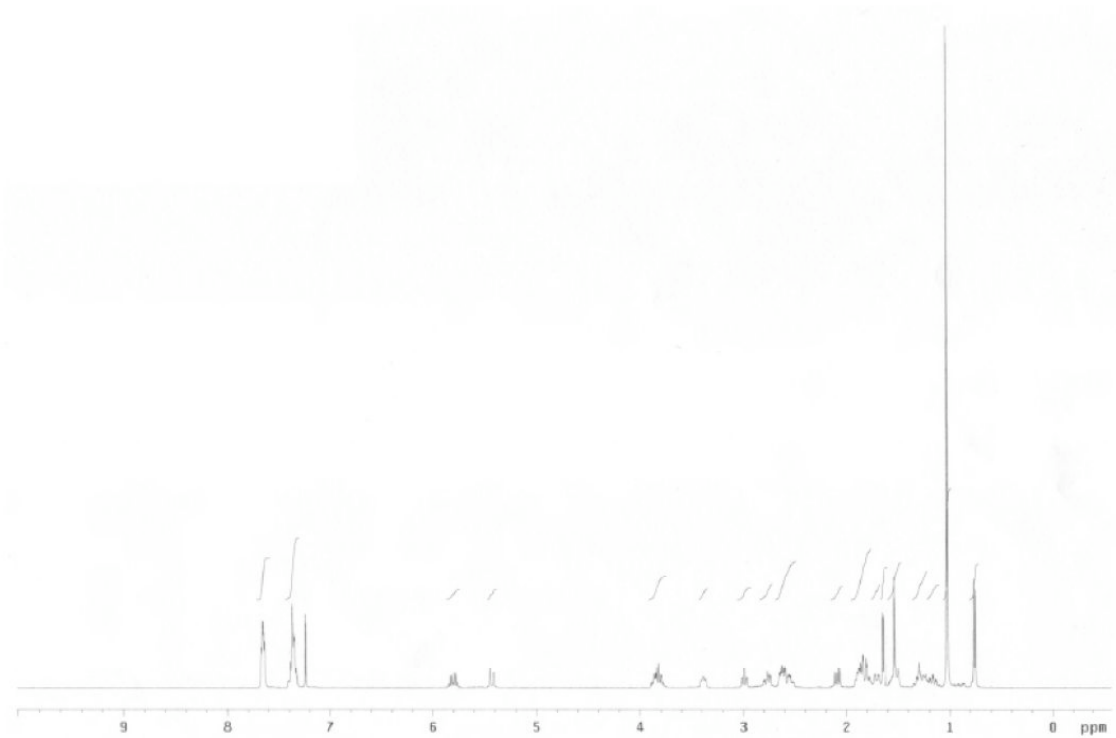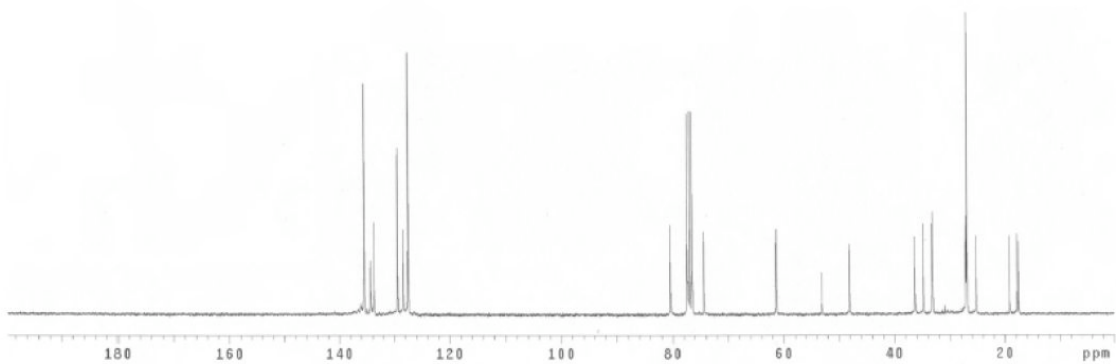





Synthesis of a 35-Member Stereoisomer Library of Bistramide A: Evaluation of Effects on Actin State, Cell Cycle and Tumor Cell Growth

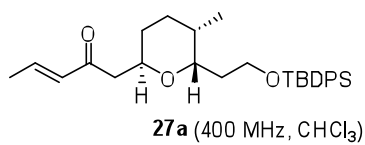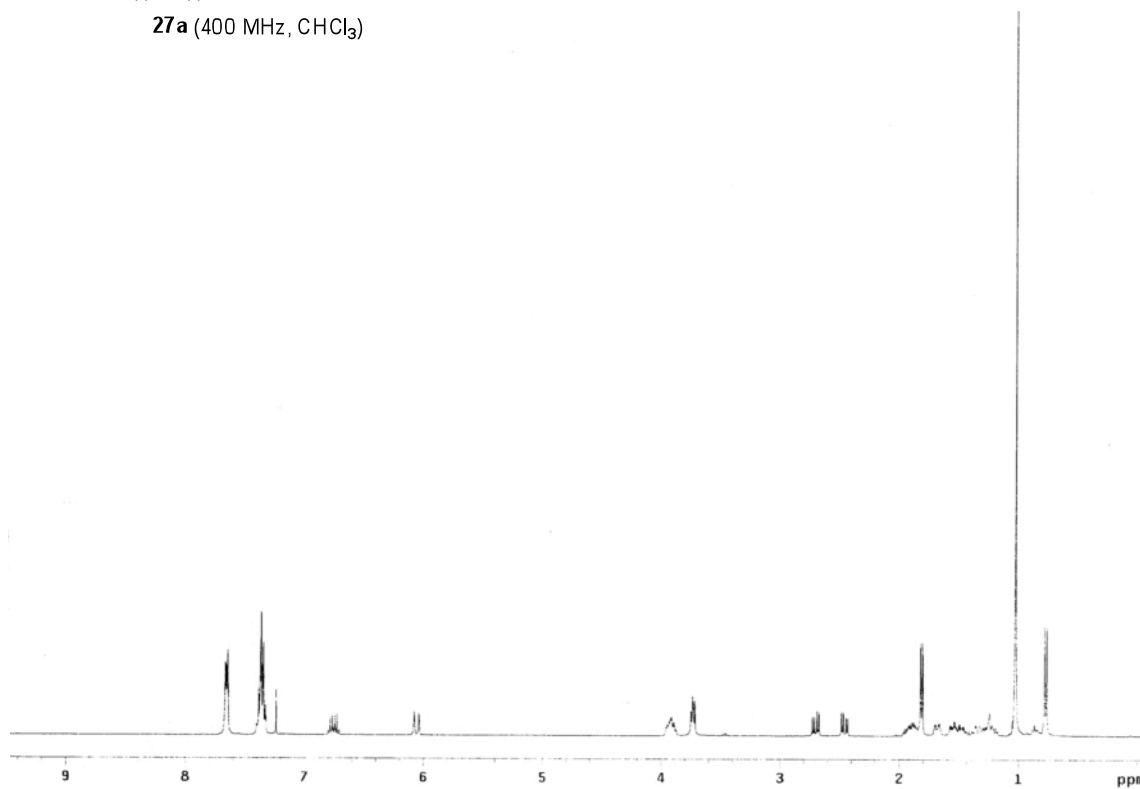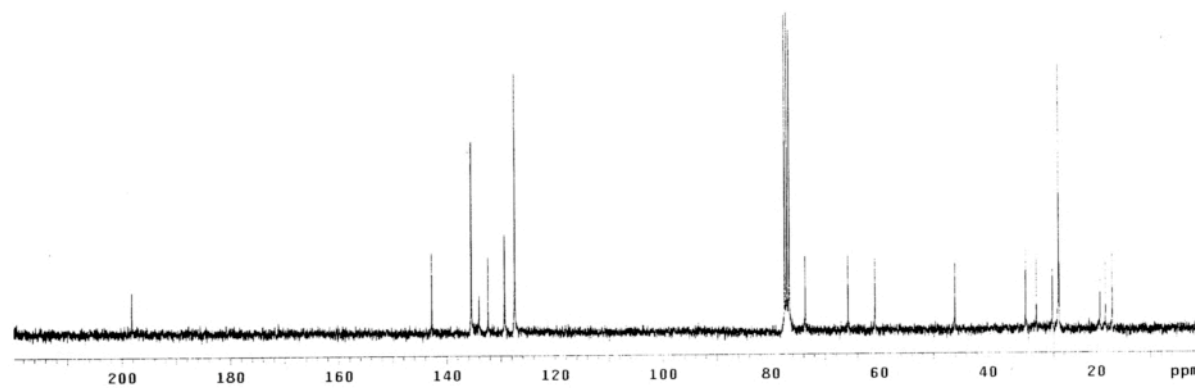

Synthesis of a 35-Member Stereoisomer Library of Bistramide A: Evaluation of Effects on Actin State, Cell Cycle and Tumor Cell Growth

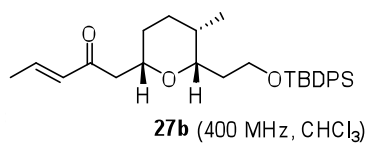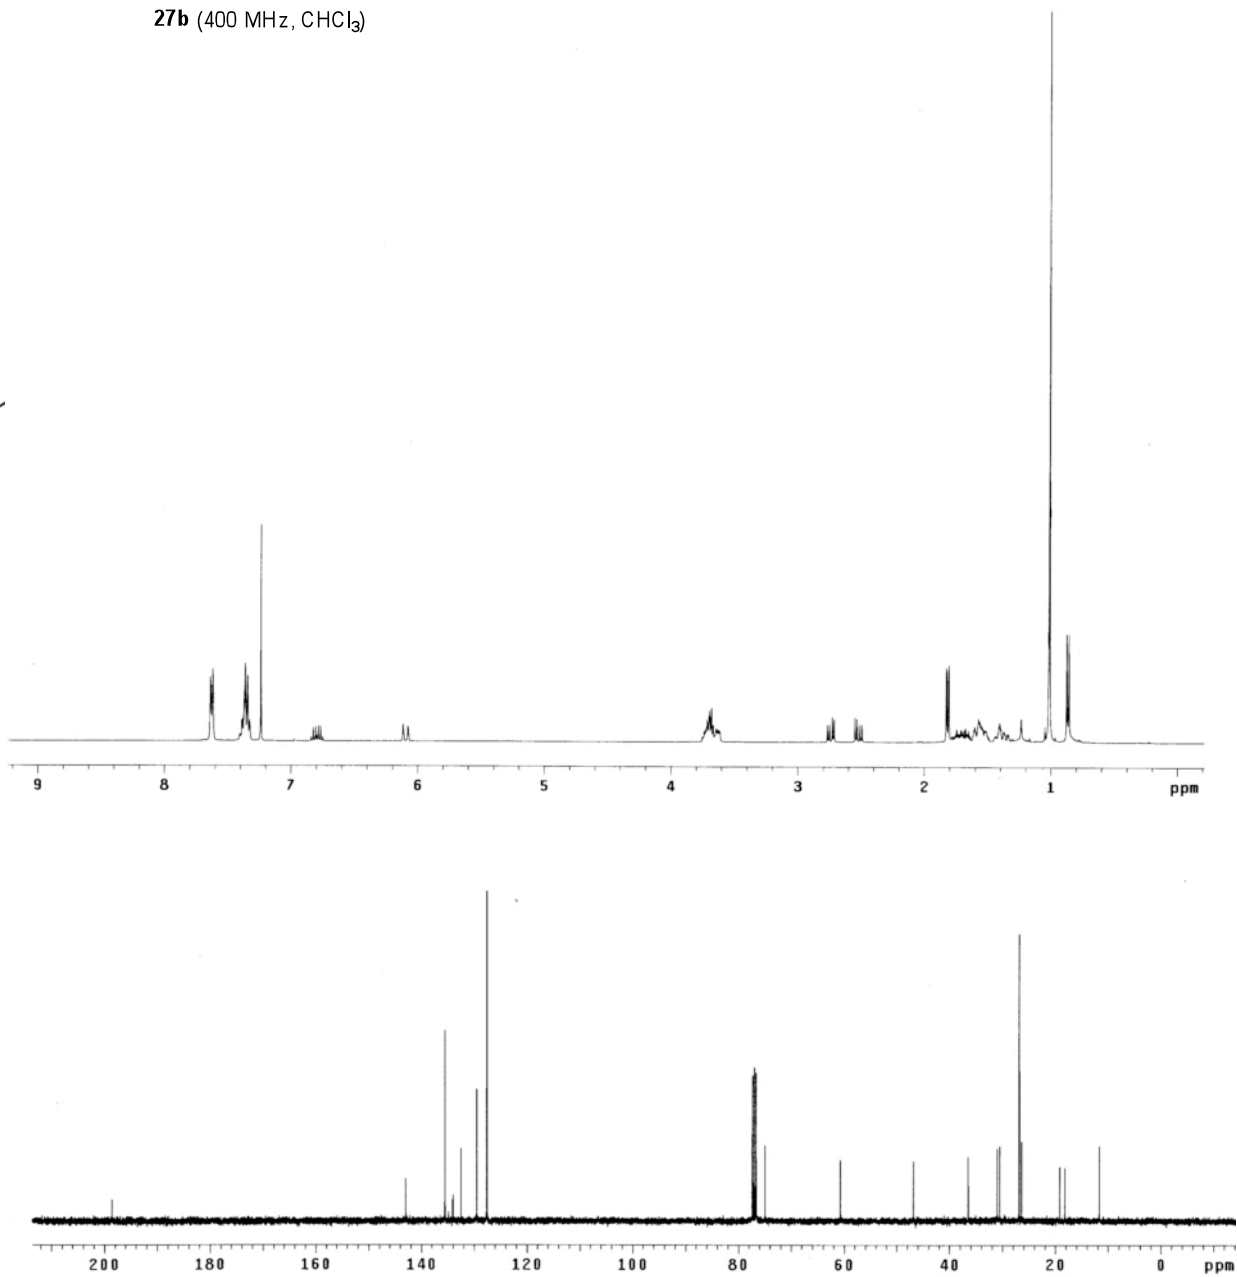

Synthesis of a 35-Member Stereoisomer Library of Bistramide A: Evaluation of Effects on Actin State, Cell Cycle and Tumor Cell Growth

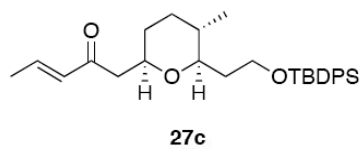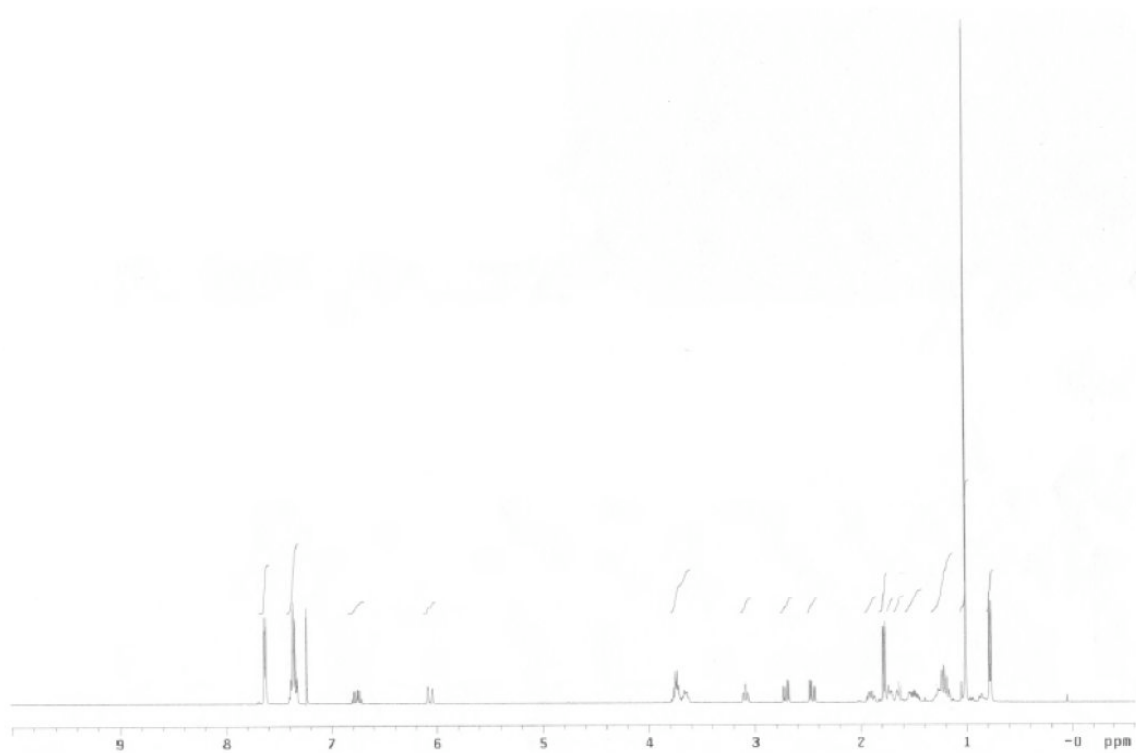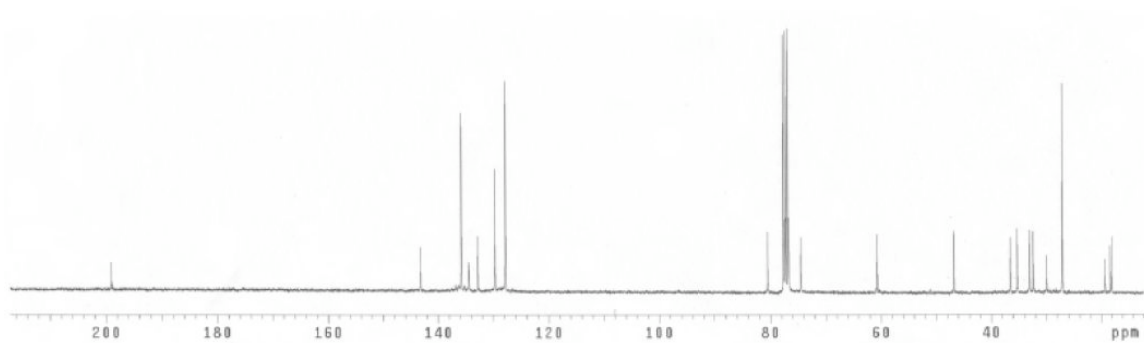

Synthesis of a 35-Member Stereoisomer Library of Bistramide A: Evaluation of Effects on Actin State, Cell Cycle and Tumor Cell Growth

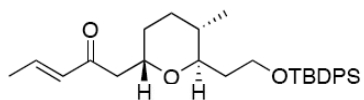

27d

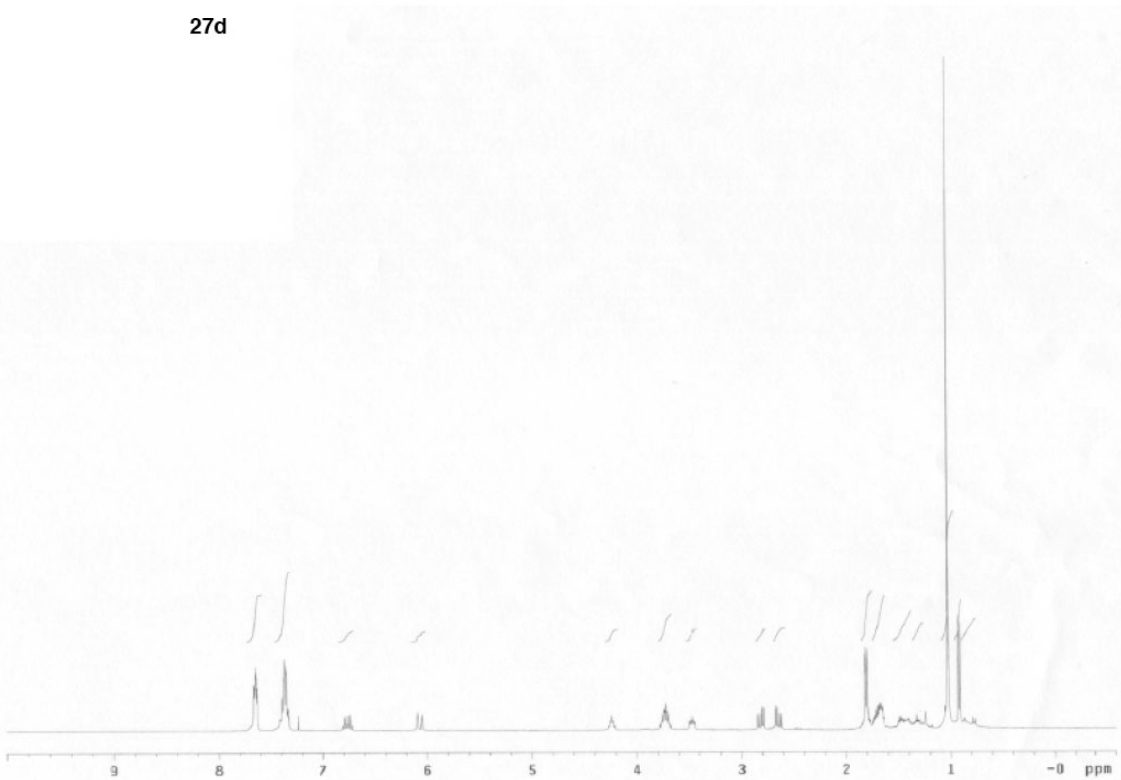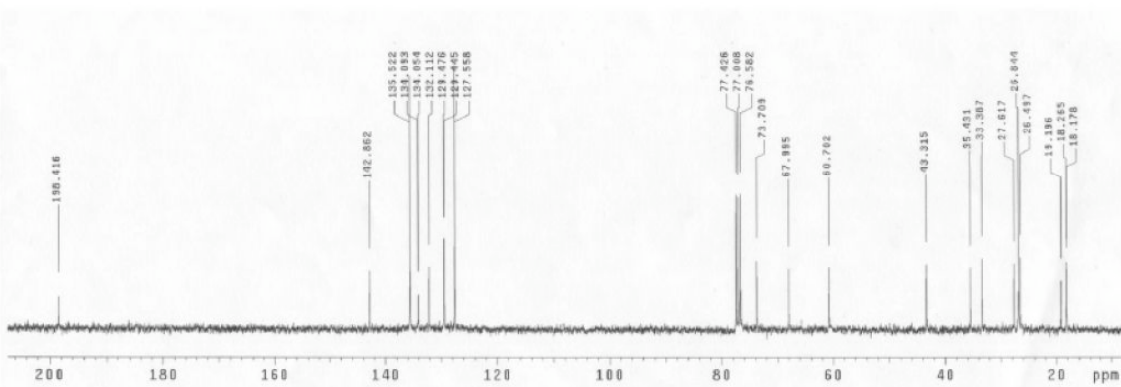

Synthesis of a 35-Member Stereoisomer Library of Bistramide A: Evaluation of Effects on Actin State, Cell Cycle and Tumor Cell Growth

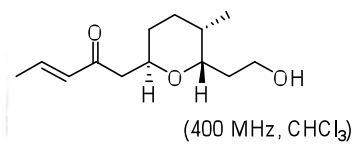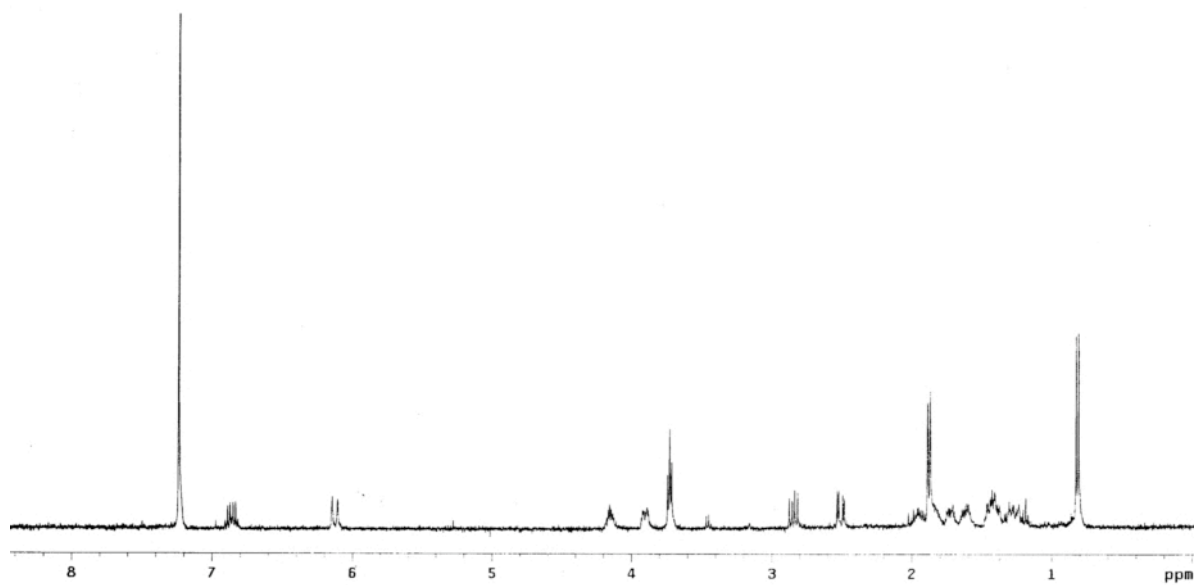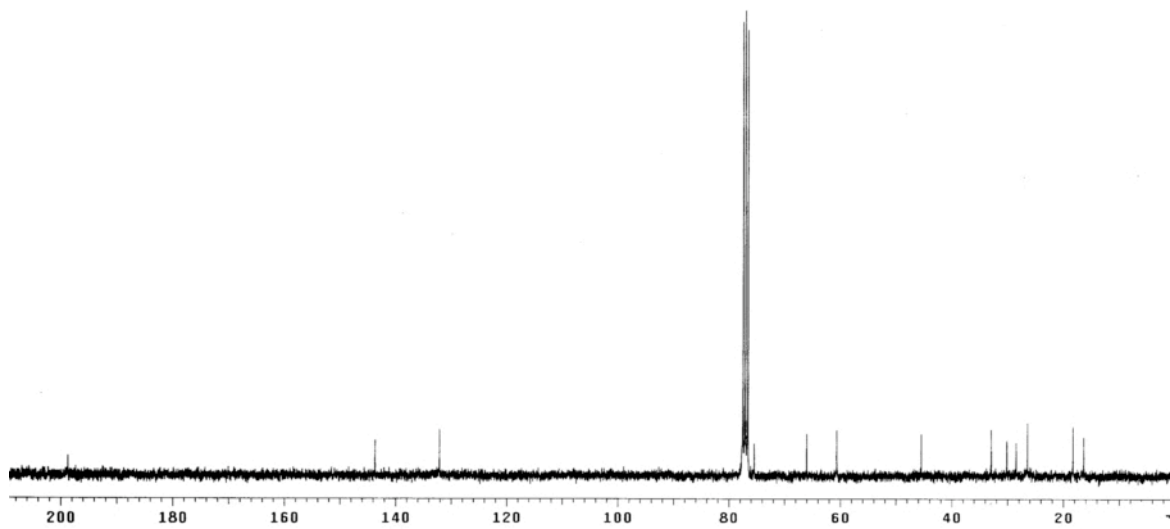

Synthesis of a 35-Member Stereoisomer Library of Bistramide A: Evaluation of Effects on Actin State, Cell Cycle and Tumor Cell Growth

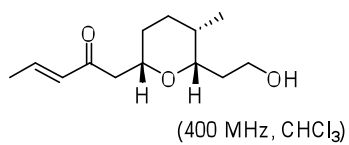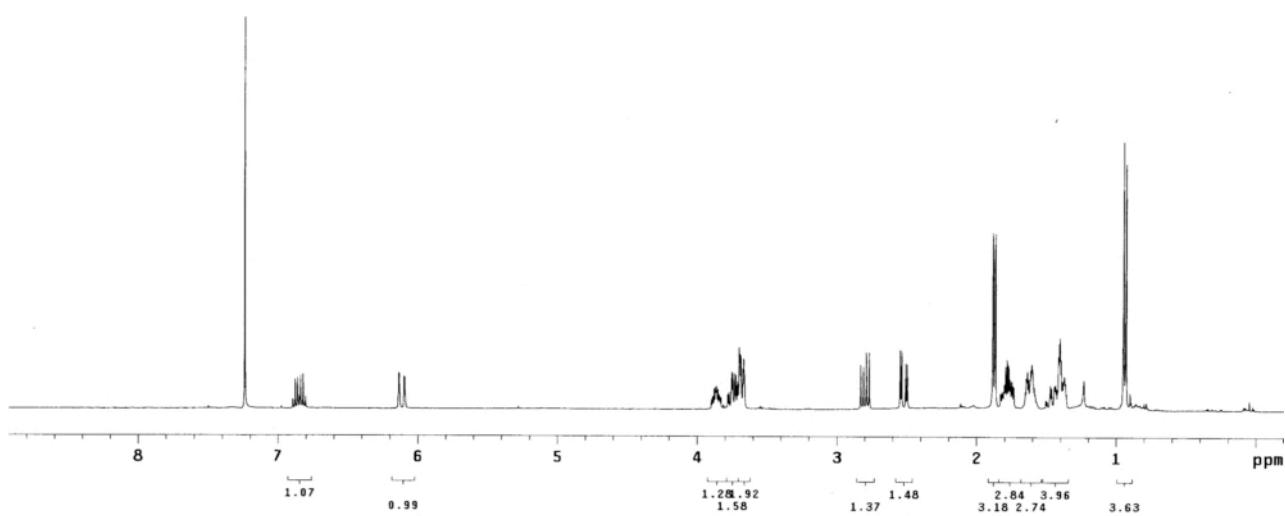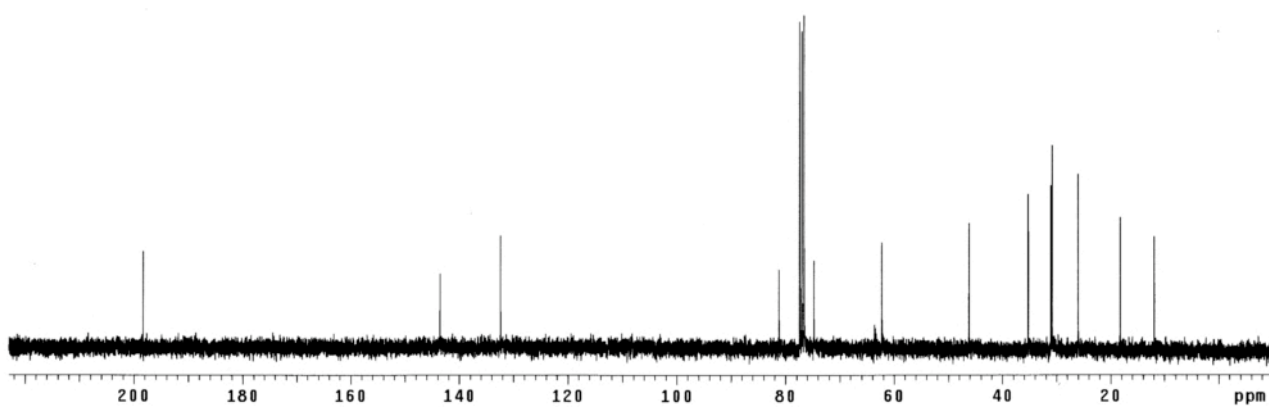

Synthesis of a 35-Member Stereoisomer Library of Bistramide A: Evaluation of Effects on Actin State, Cell Cycle and Tumor Cell Growth

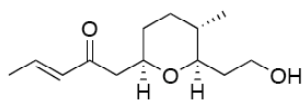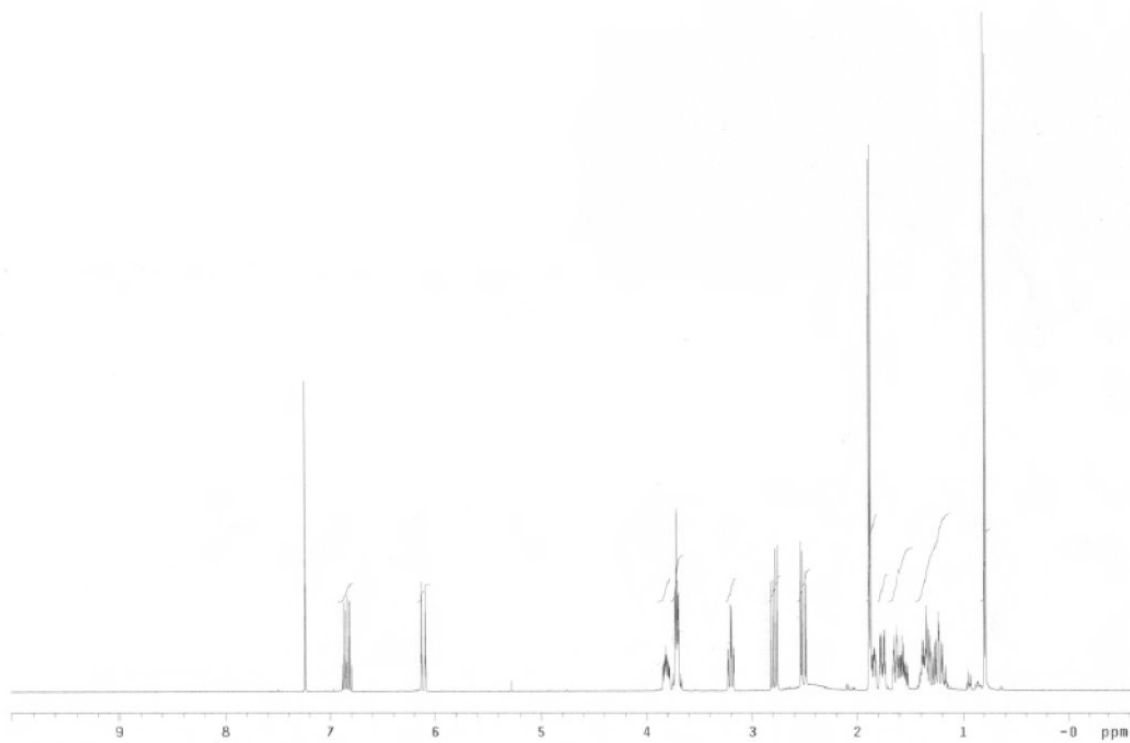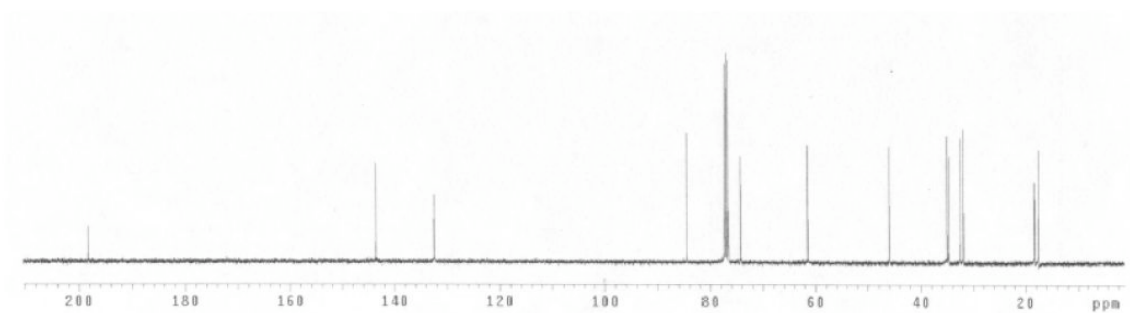



Synthesis of a 35-Member Stereoisomer Library of Bistramide A: Evaluation of Effects on Actin State, Cell Cycle and Tumor Cell Growth

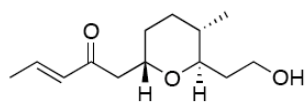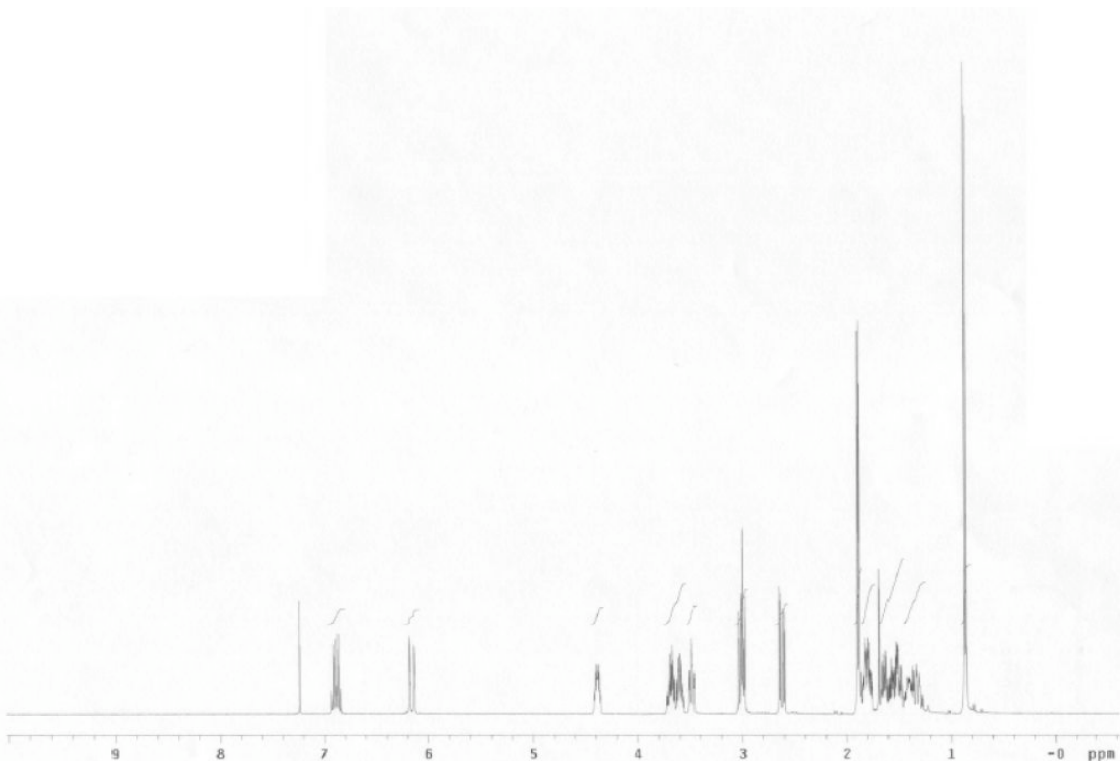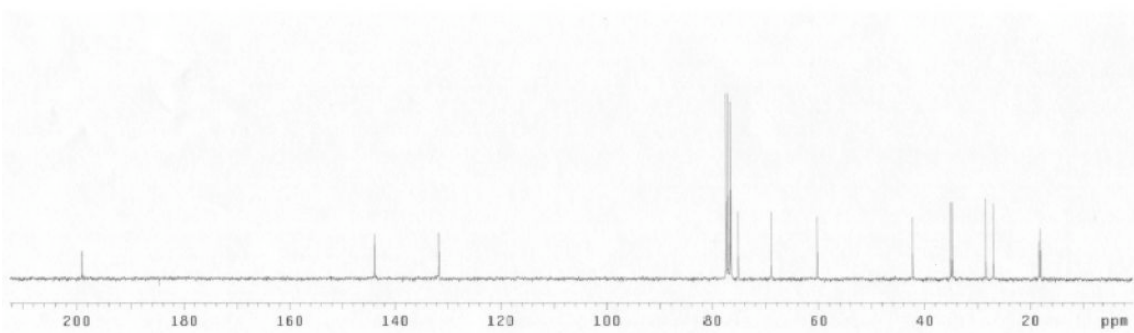

Synthesis of a 35-Member Stereoisomer Library of Bistramide A: Evaluation of Effects on Actin State, Cell Cycle and Tumor Cell Growth

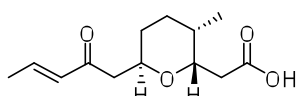

**6a** (400 MHz, C<sub>6</sub>D<sub>6</sub>)

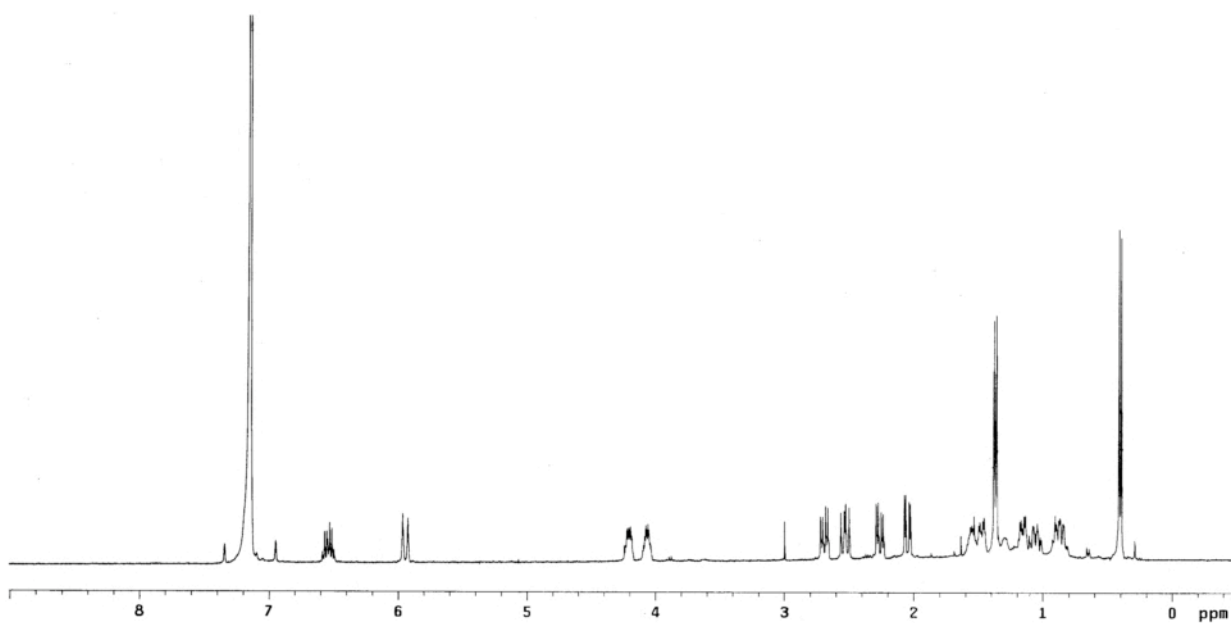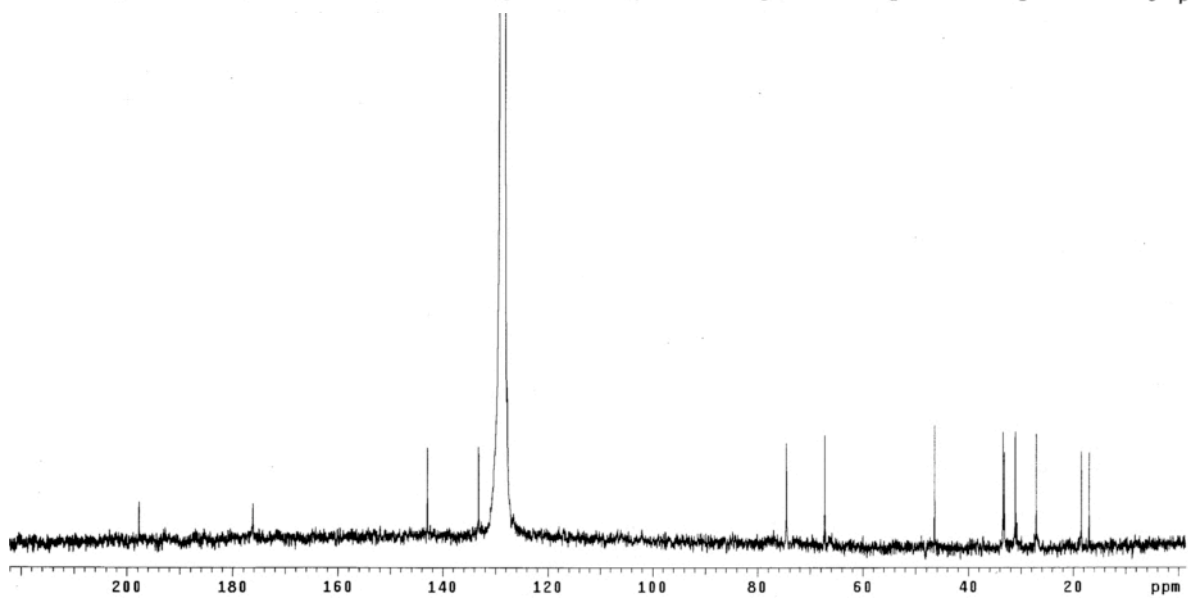

Synthesis of a 35-Member Stereoisomer Library of Bistramide A: Evaluation of Effects on Actin State, Cell Cycle and Tumor Cell Growth

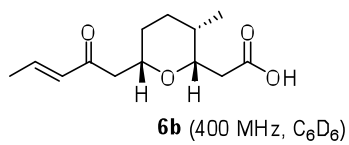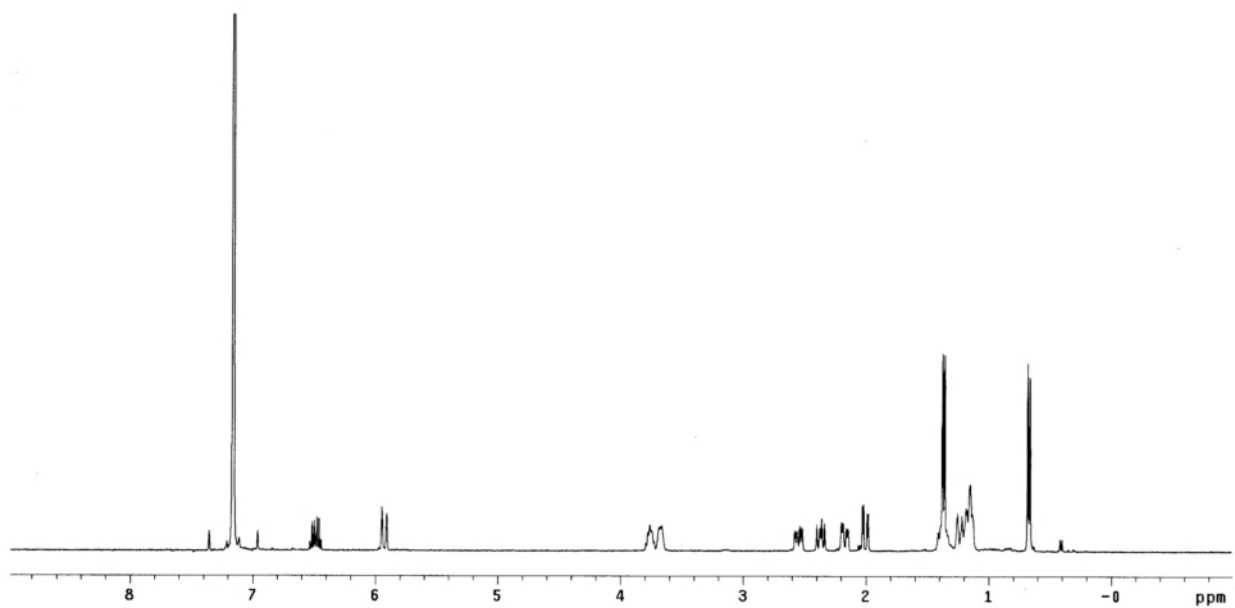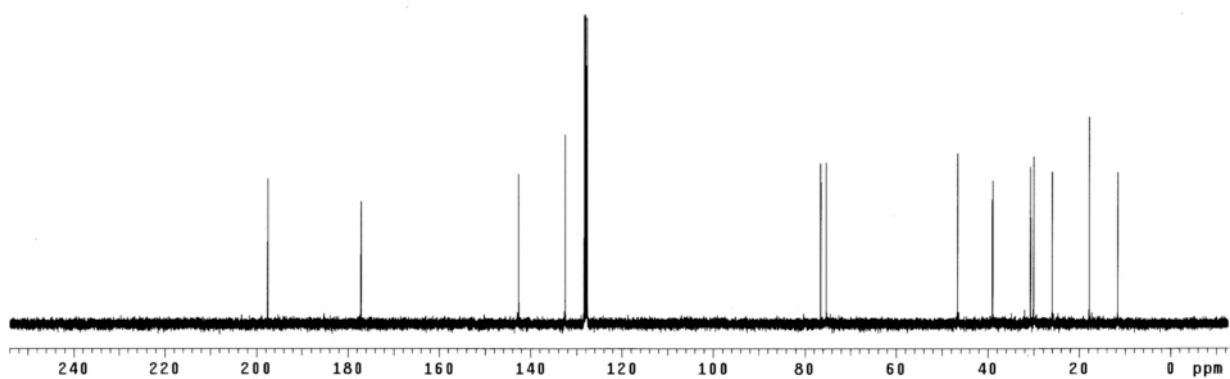

Synthesis of a 35-Member Stereoisomer Library of Bistramide A: Evaluation of Effects on Actin State, Cell Cycle and Tumor Cell Growth

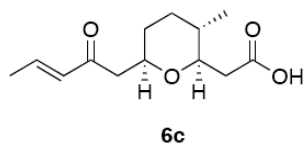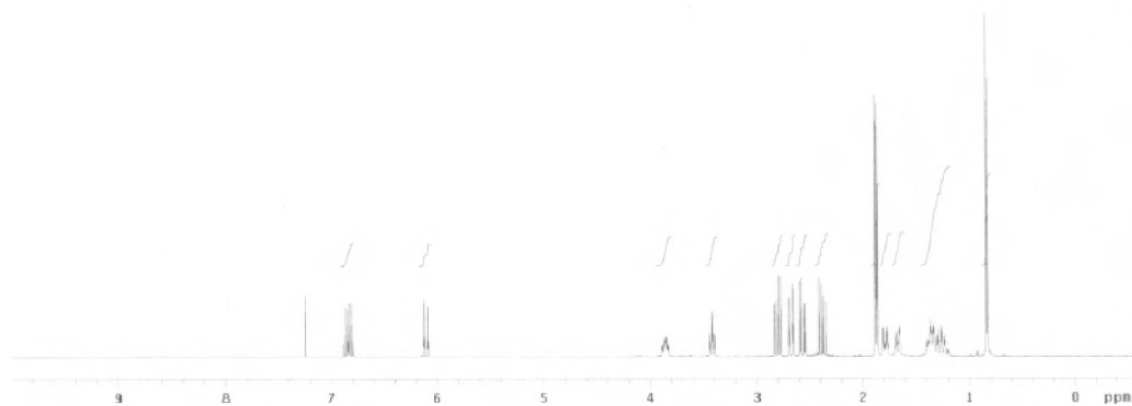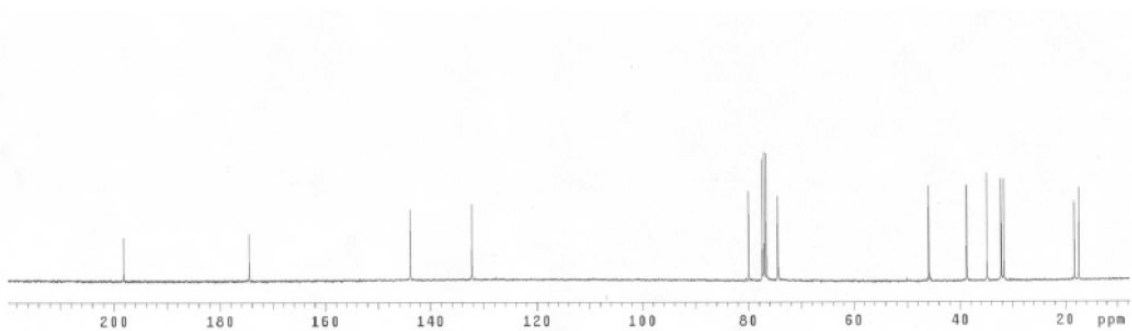

Synthesis of a 35-Member Stereoisomer Library of Bistramide A: Evaluation of Effects on Actin State, Cell Cycle and Tumor Cell Growth

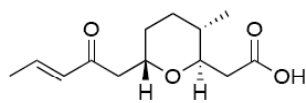

**6d**

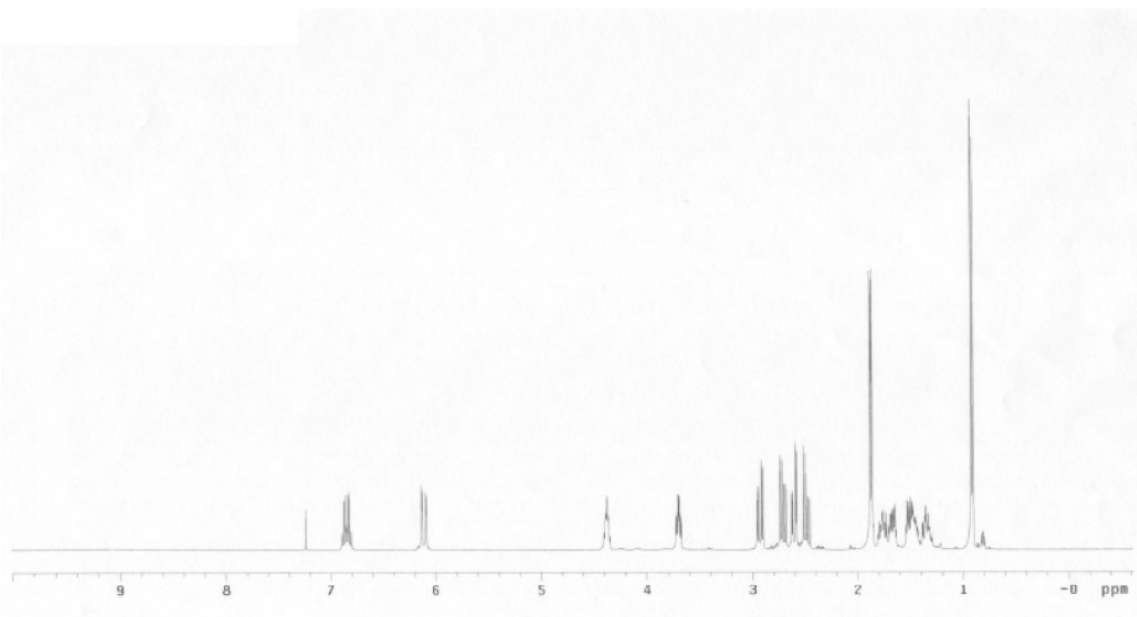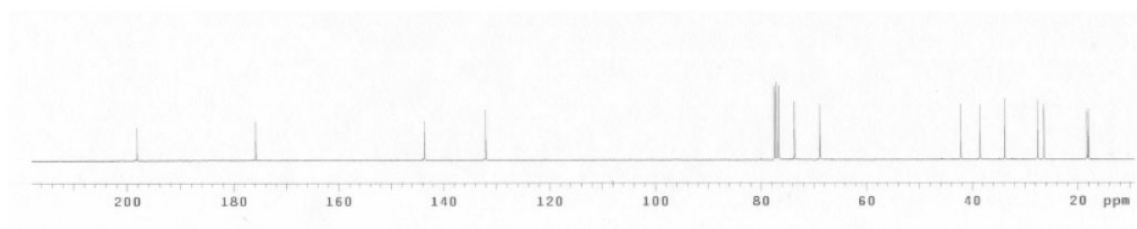

Synthesis of a 35-Member Stereoisomer Library of Bistramide A: Evaluation of Effects on Actin State, Cell Cycle and Tumor Cell Growth

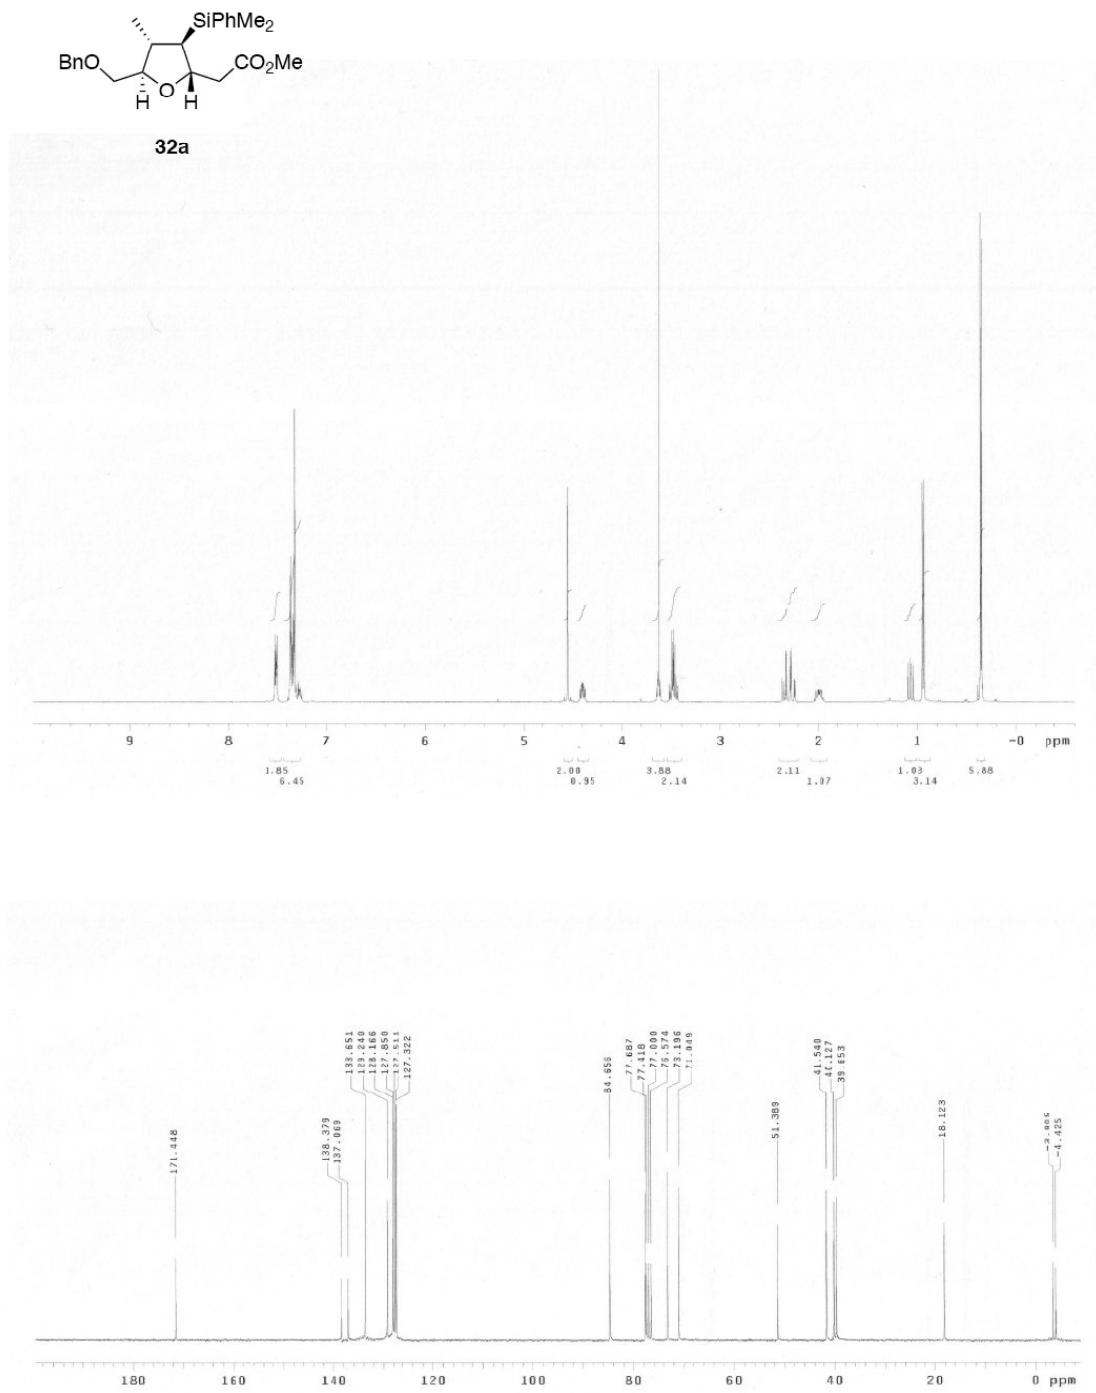

Synthesis of a 35-Member Stereoisomer Library of Bistramide A: Evaluation of Effects on Actin State, Cell Cycle and Tumor Cell Growth

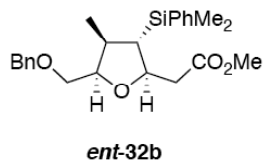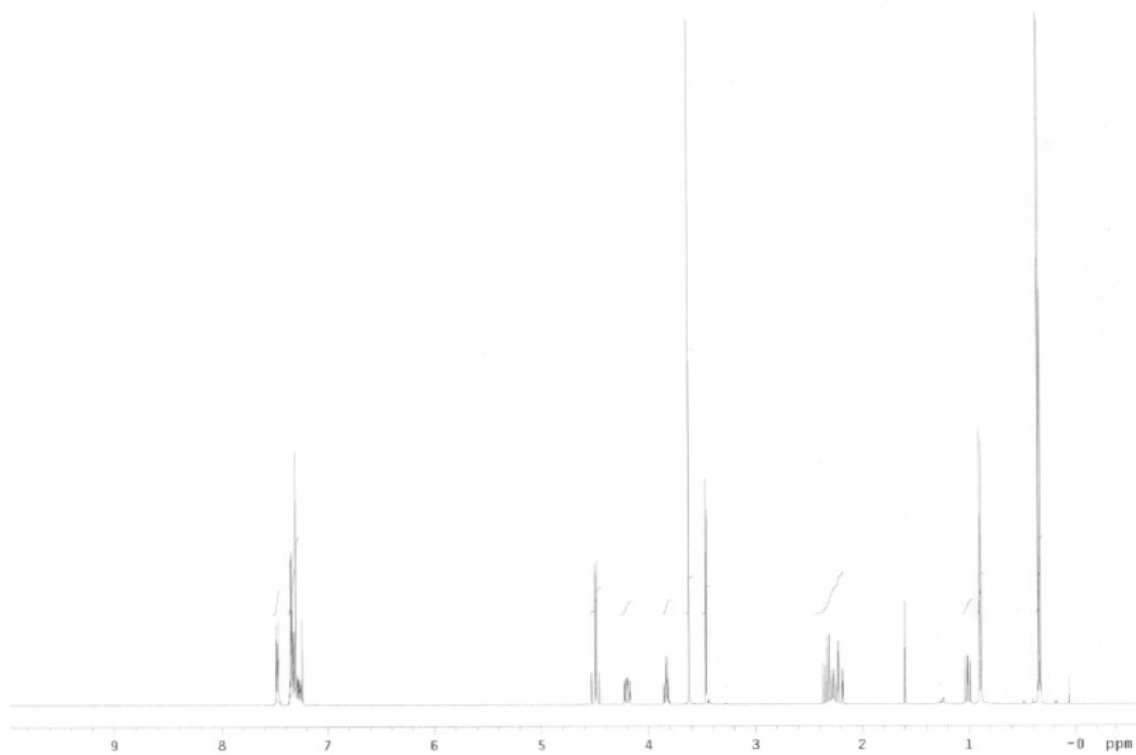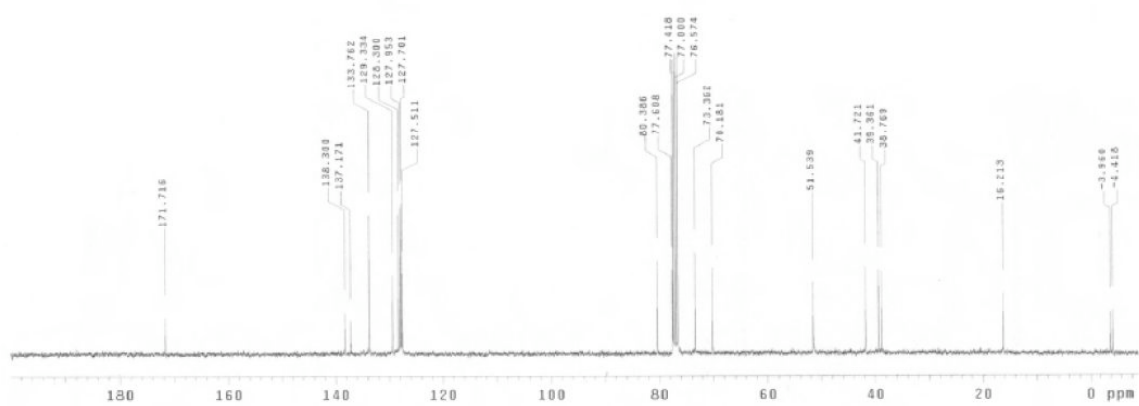

Synthesis of a 35-Member Stereoisomer Library of Bistramide A: Evaluation of Effects on Actin State, Cell Cycle and Tumor Cell Growth

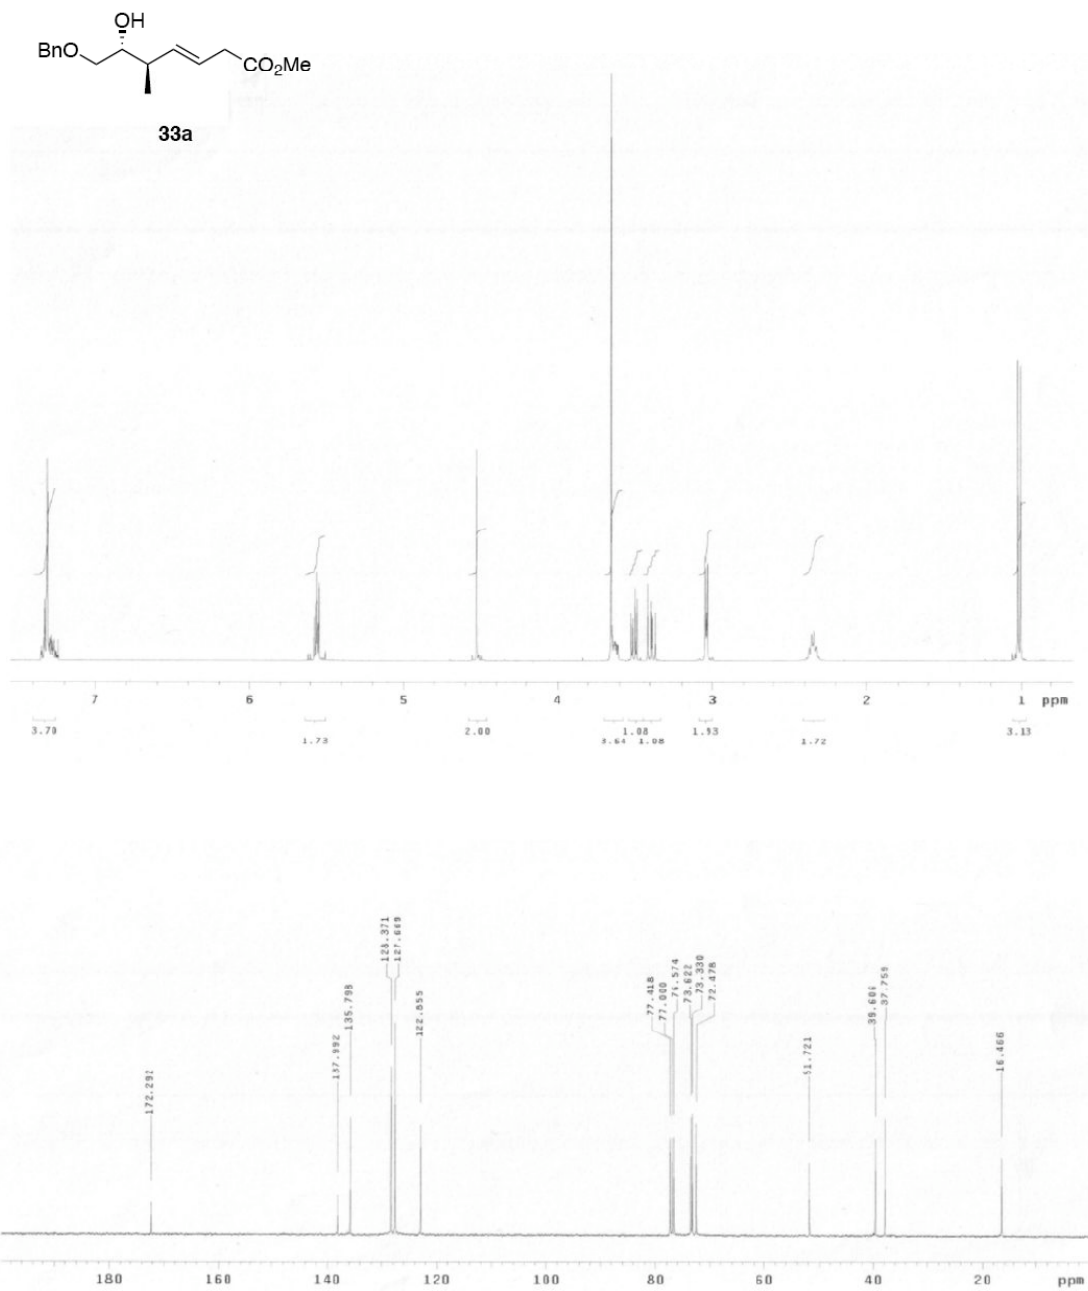



Synthesis of a 35-Member Stereoisomer Library of Bistramide A: Evaluation of Effects on Actin State, Cell Cycle and Tumor Cell Growth

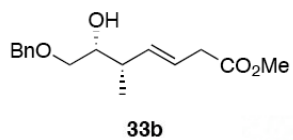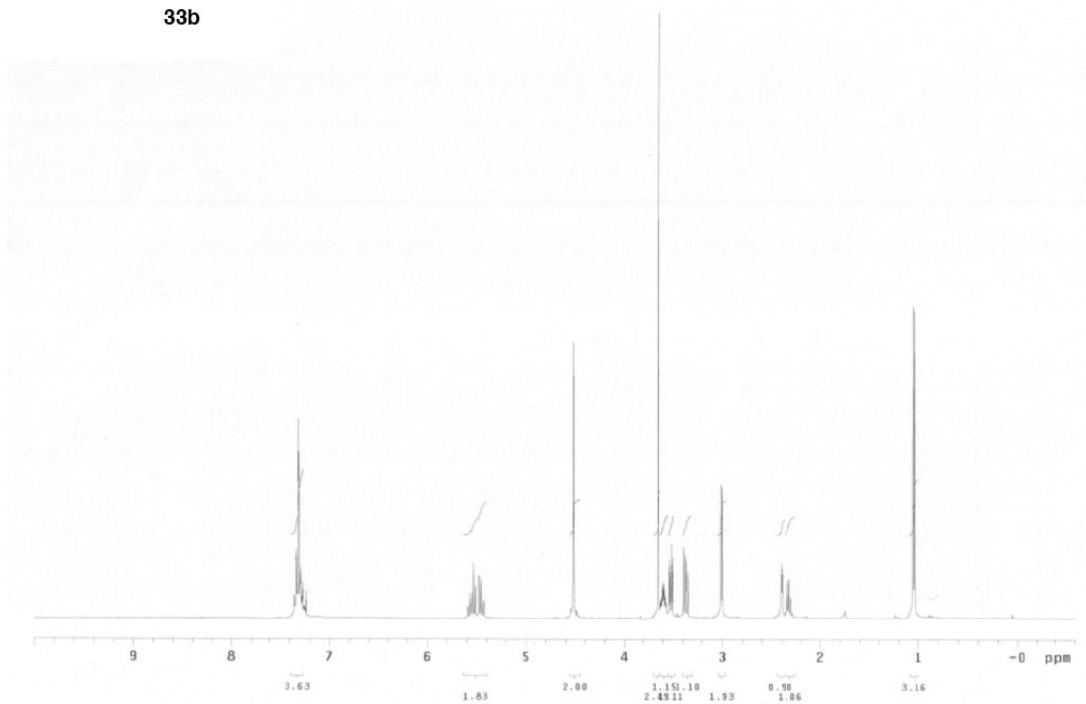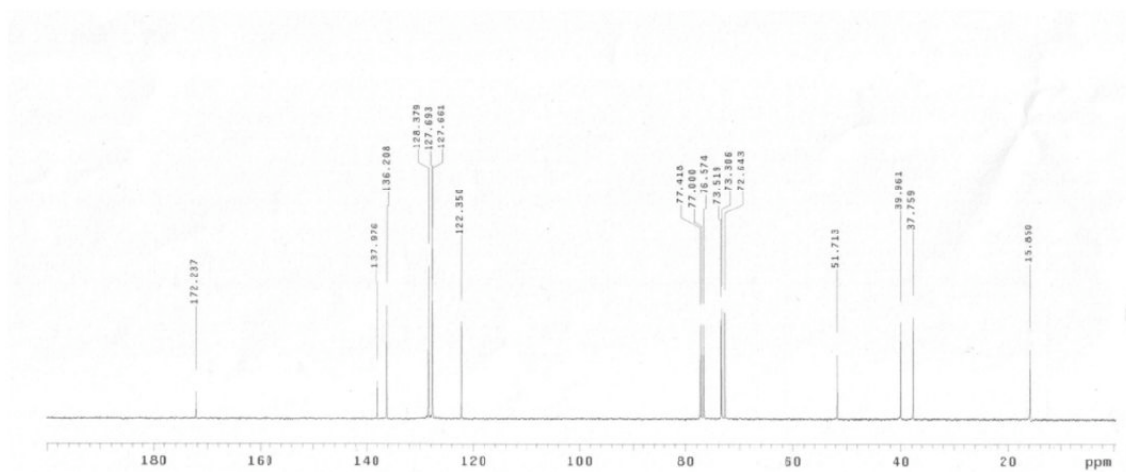





Synthesis of a 35-Member Stereoisomer Library of Bistramide A: Evaluation of Effects on Actin State, Cell Cycle and Tumor Cell Growth

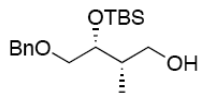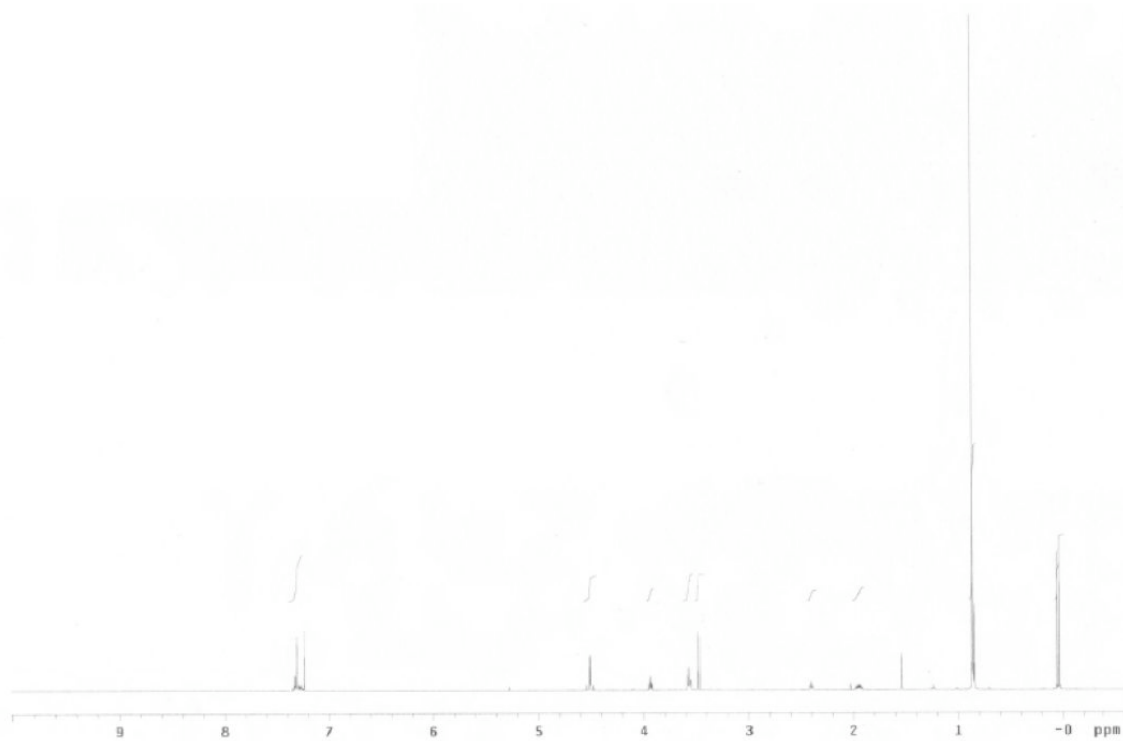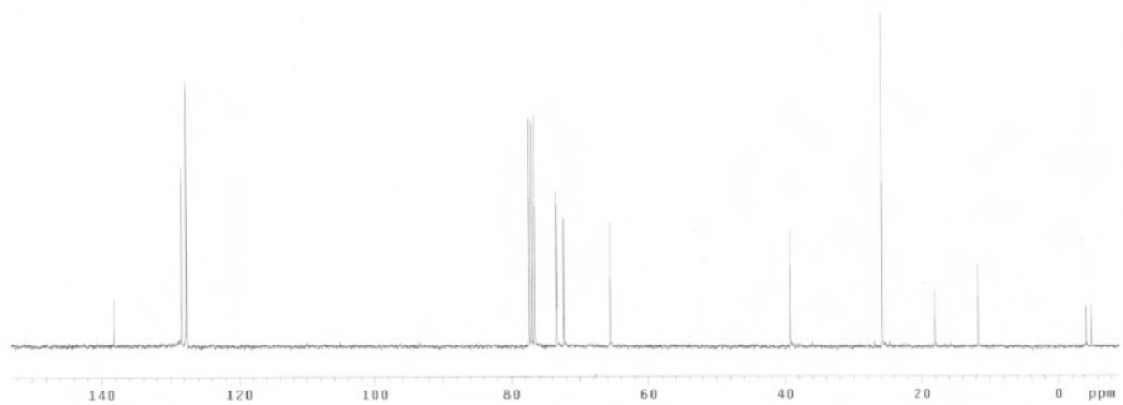

Synthesis of a 35-Member Stereoisomer Library of Bistramide A: Evaluation of Effects on Actin State, Cell Cycle and Tumor Cell Growth

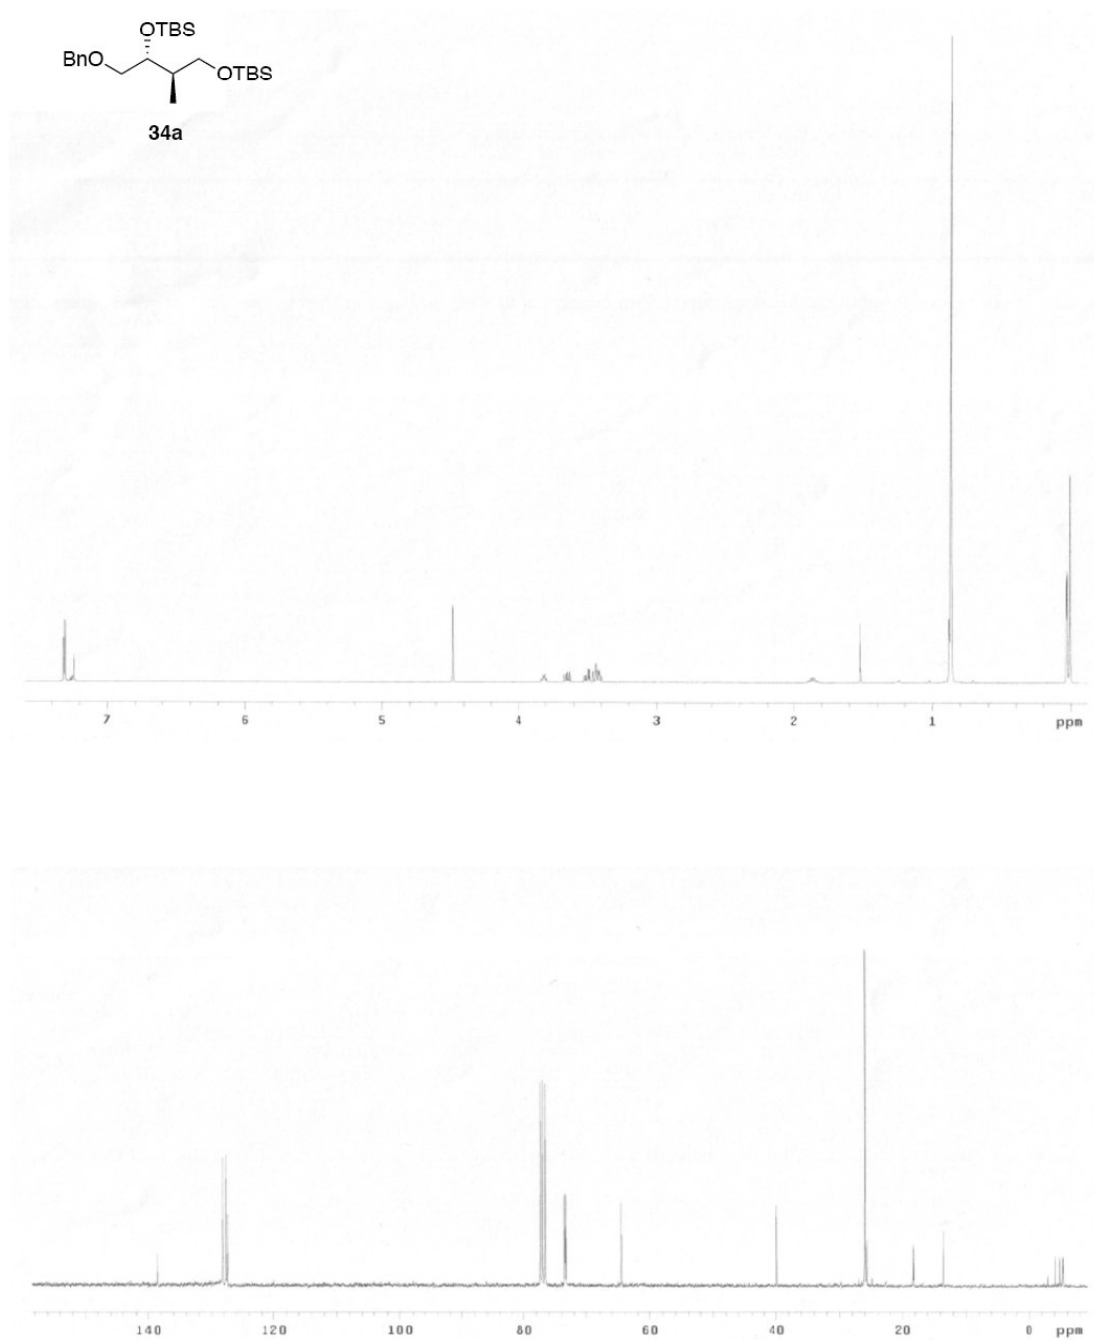

Synthesis of a 35-Member Stereoisomer Library of Bistramide A: Evaluation of Effects on Actin State, Cell Cycle and Tumor Cell Growth

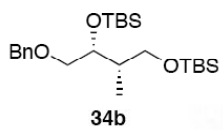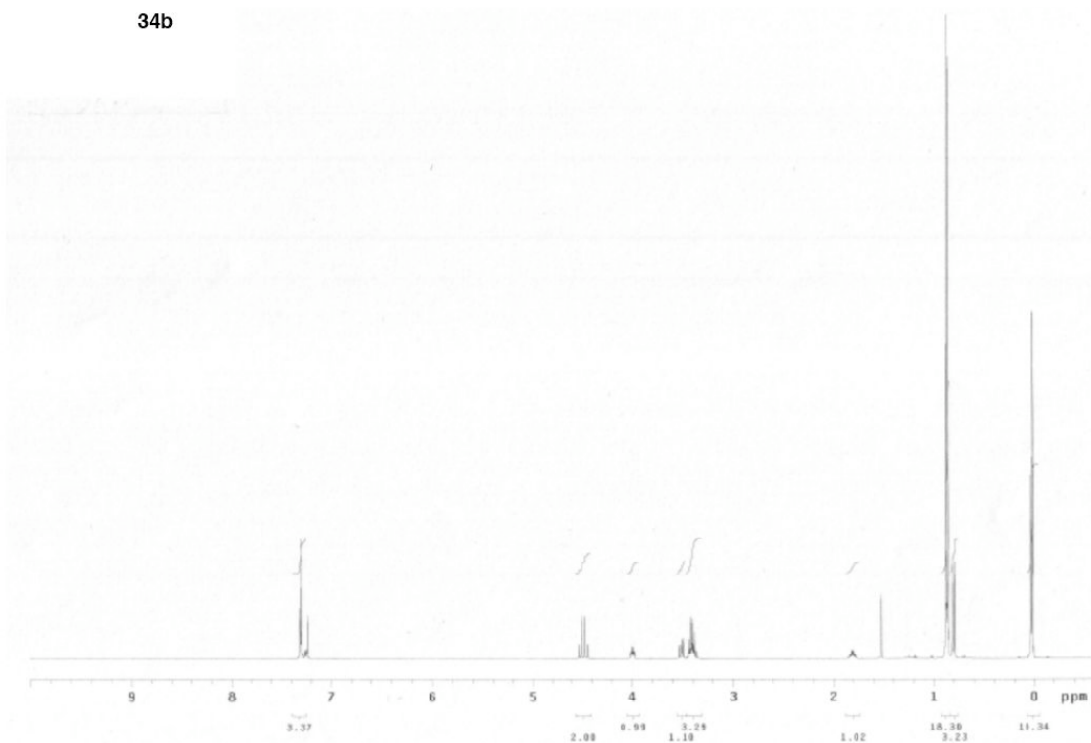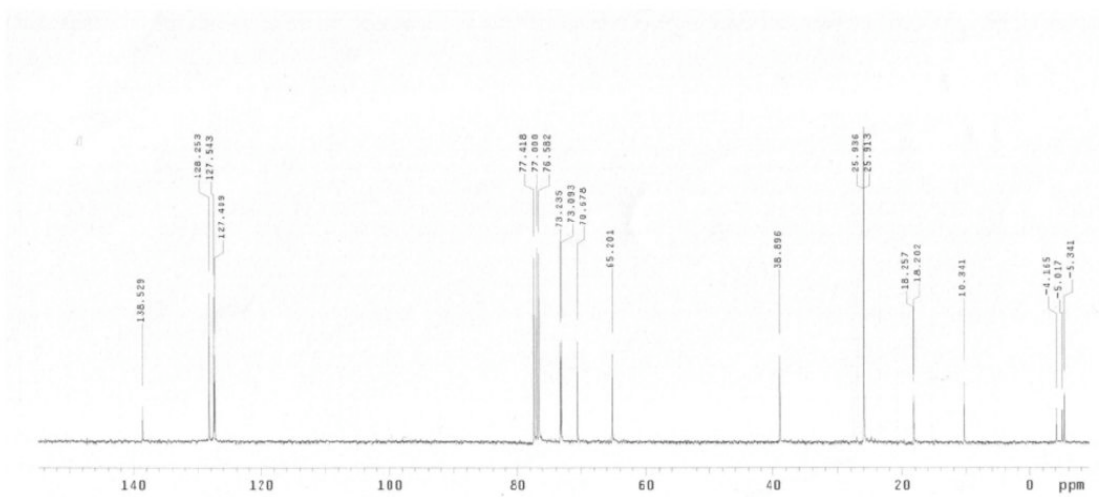

Synthesis of a 35-Member Stereoisomer Library of Bistramide A: Evaluation of Effects on Actin State, Cell Cycle and Tumor Cell Growth

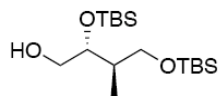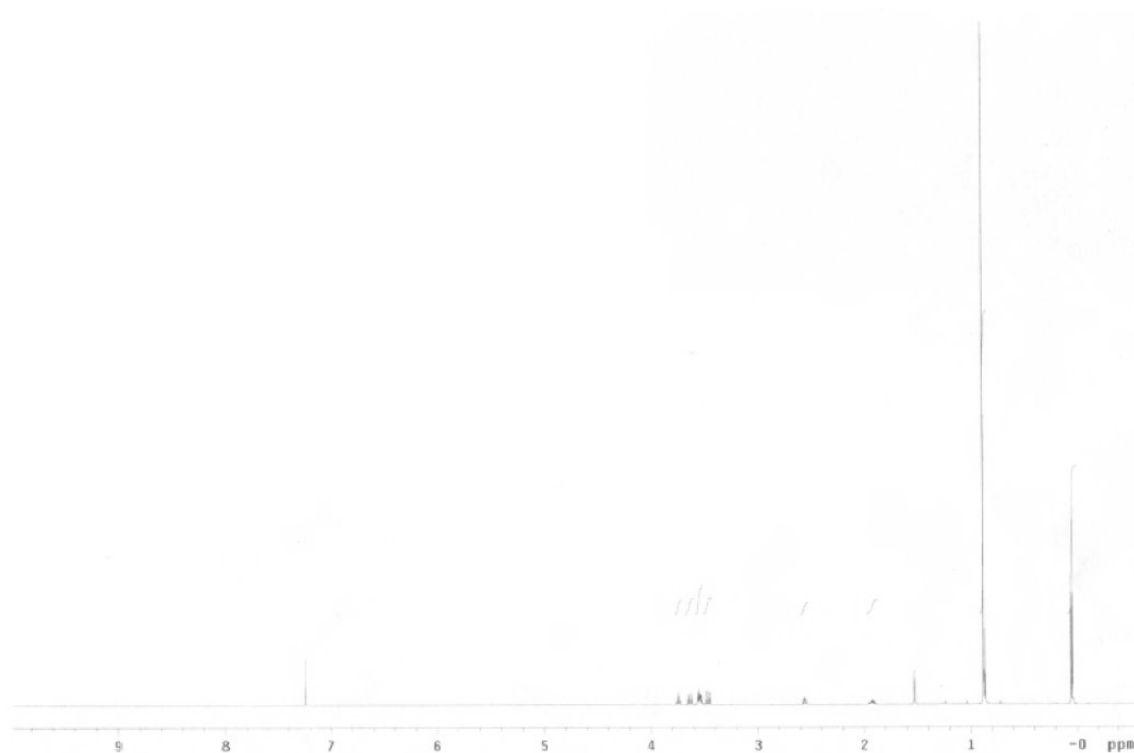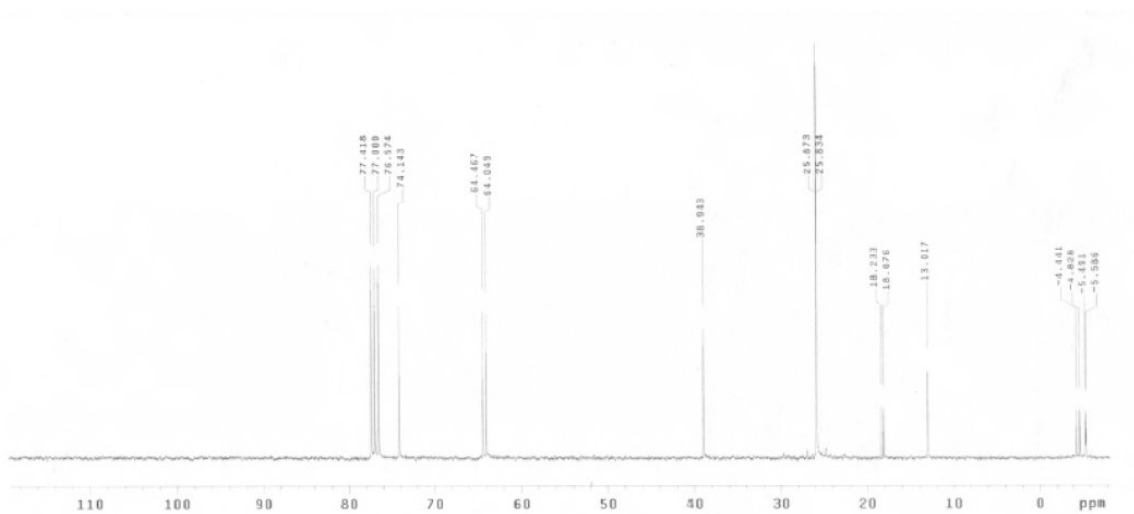

Synthesis of a 35-Member Stereoisomer Library of Bistramide A: Evaluation of Effects on Actin State, Cell Cycle and Tumor Cell Growth

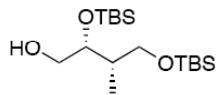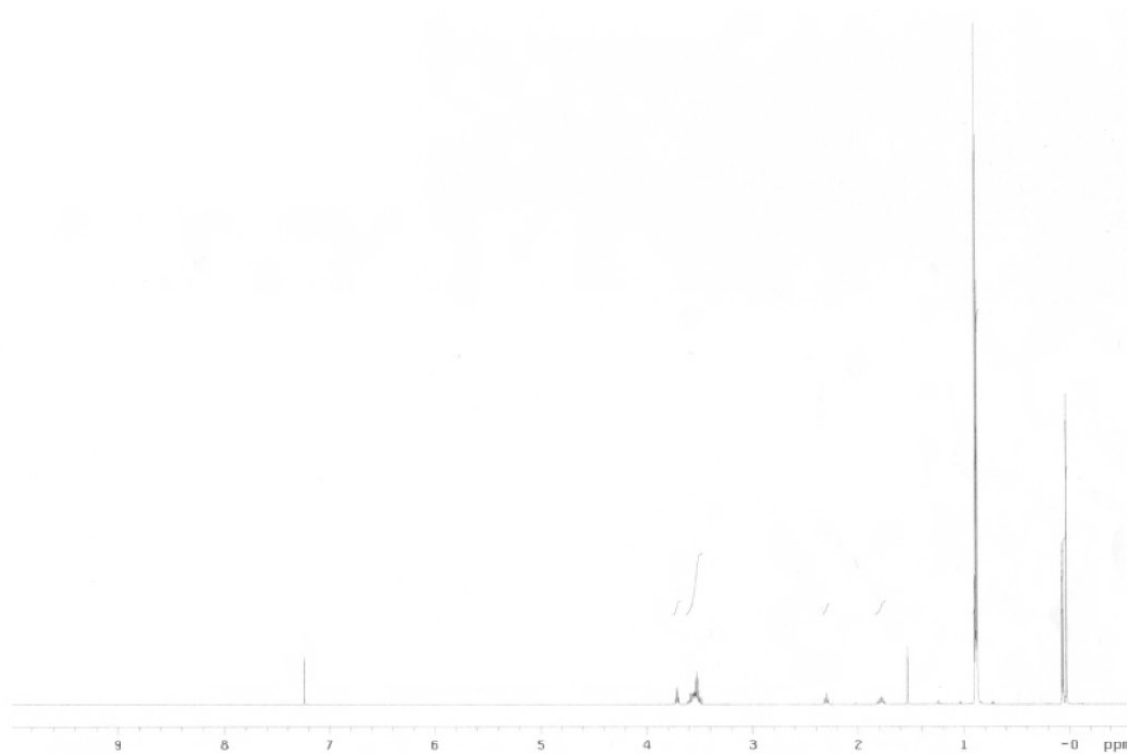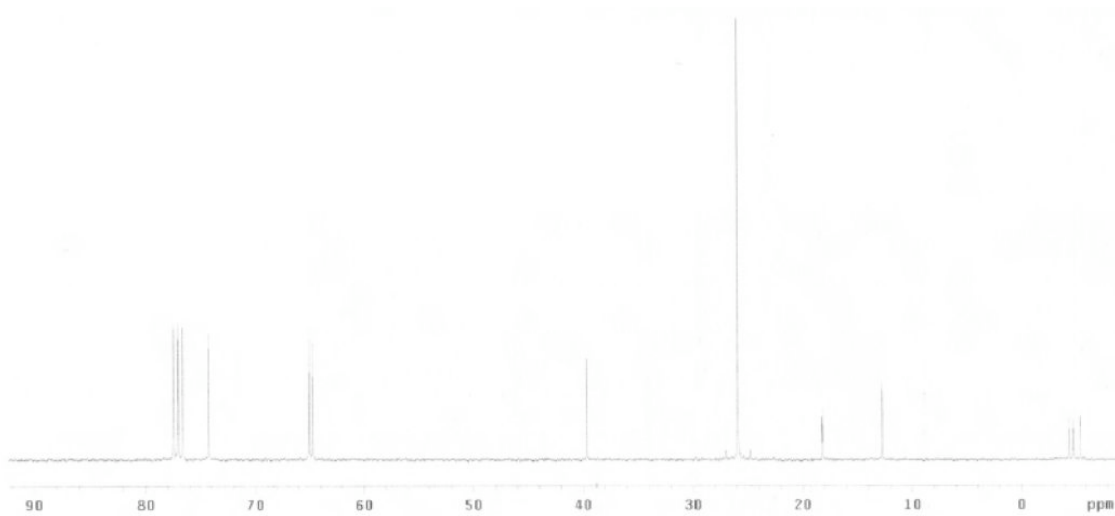



Synthesis of a 35-Member Stereoisomer Library of Bistramide A: Evaluation of Effects on Actin State, Cell Cycle and Tumor Cell Growth

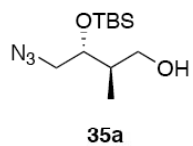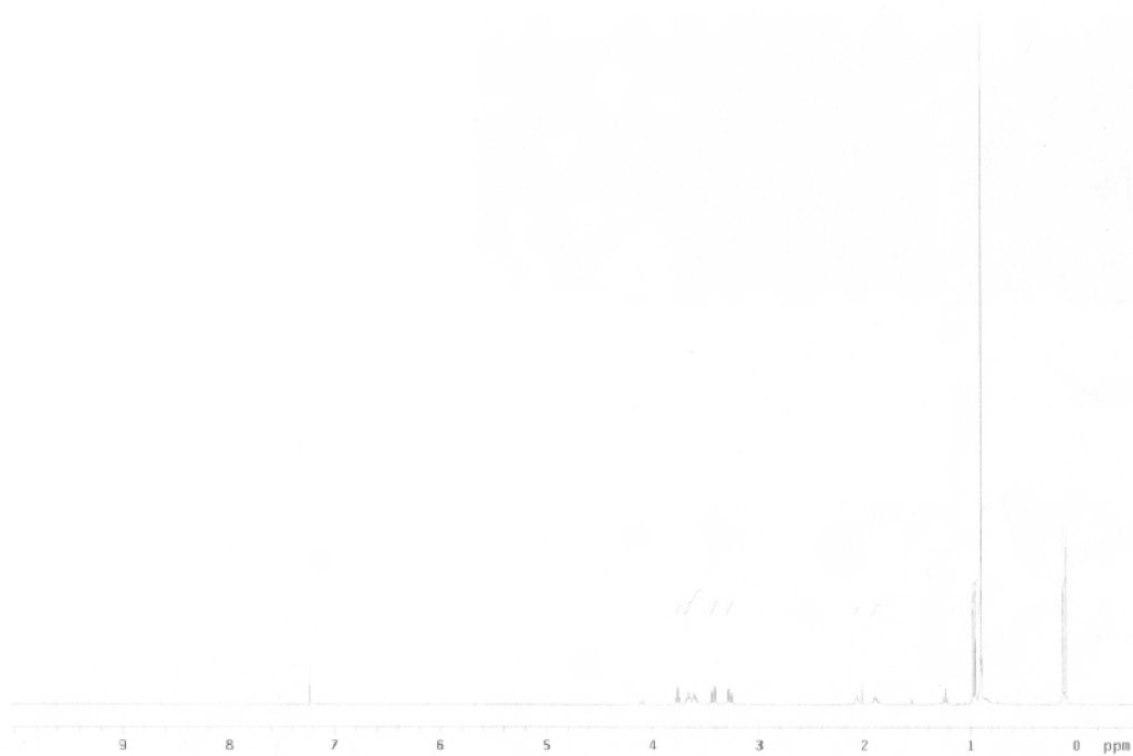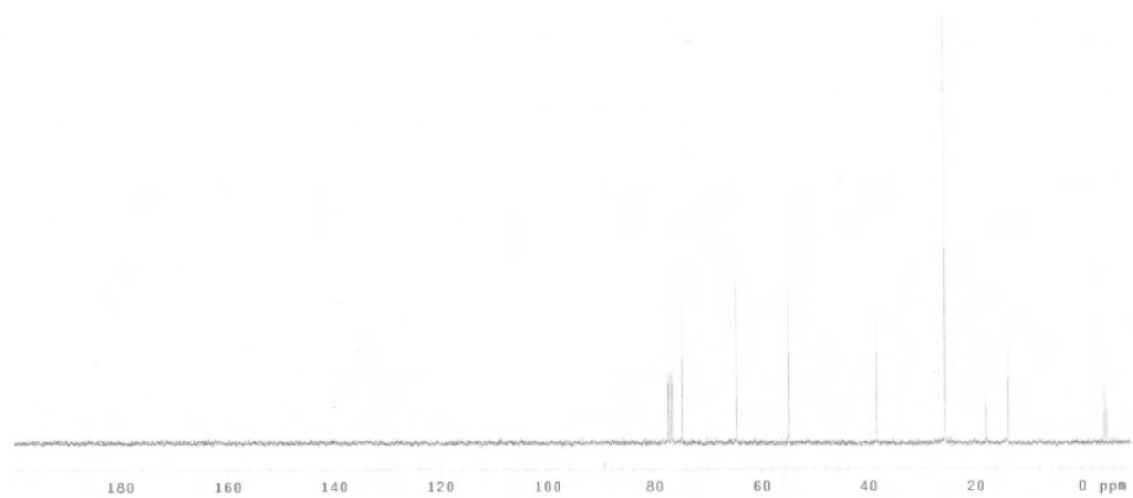

Synthesis of a 35-Member Stereoisomer Library of Bistramide A: Evaluation of Effects on Actin State, Cell Cycle and Tumor Cell Growth

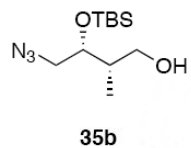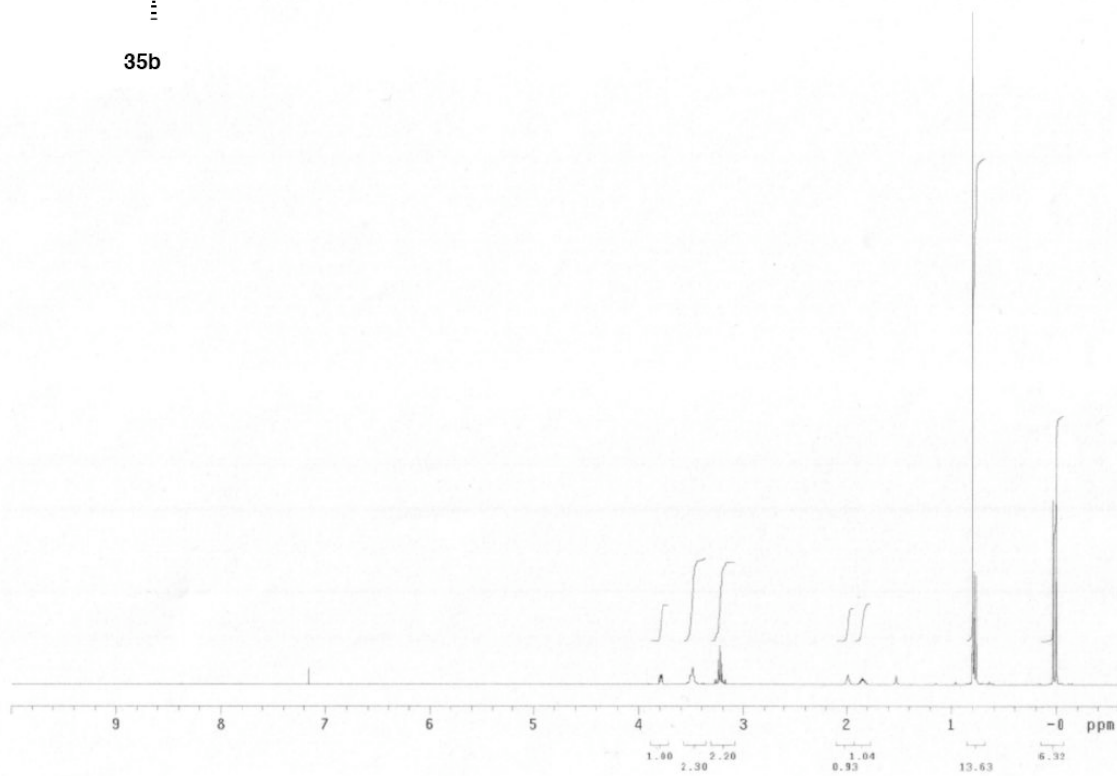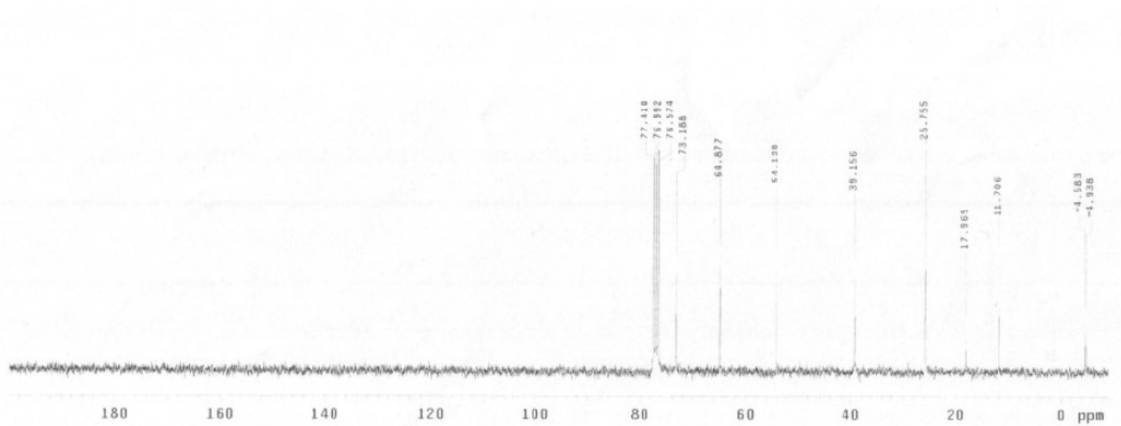

Synthesis of a 35-Member Stereoisomer Library of Bistramide A: Evaluation of Effects on Actin State, Cell Cycle and Tumor Cell Growth

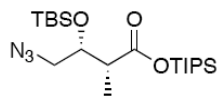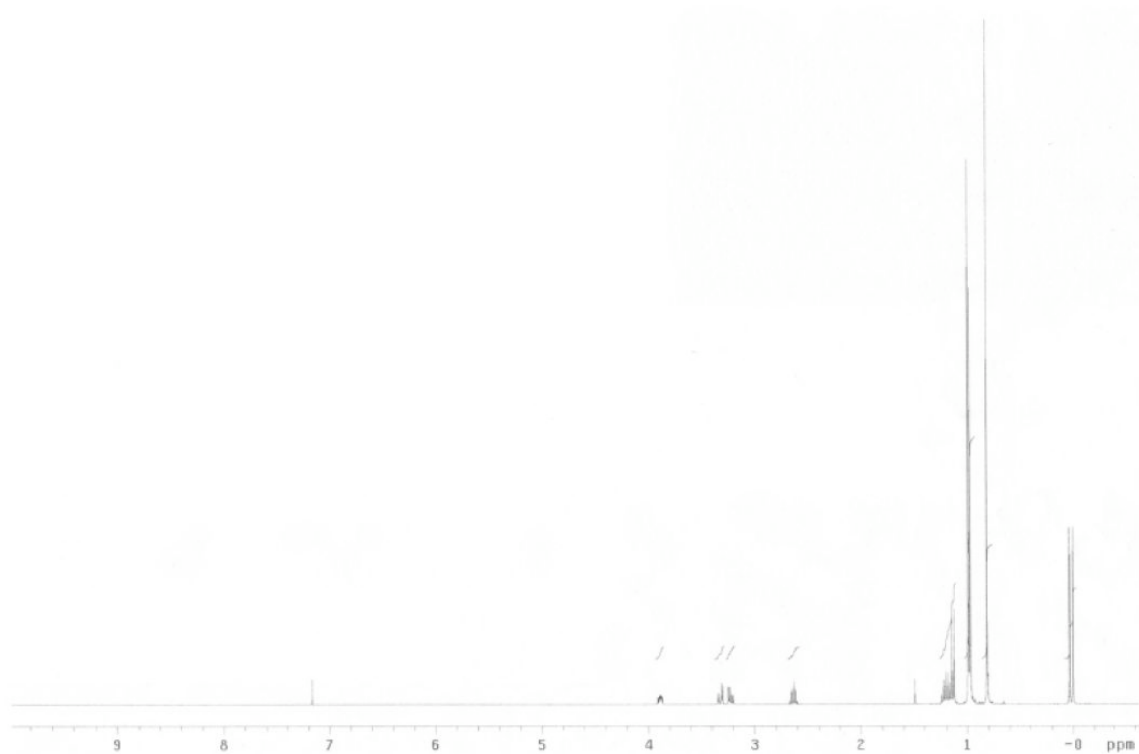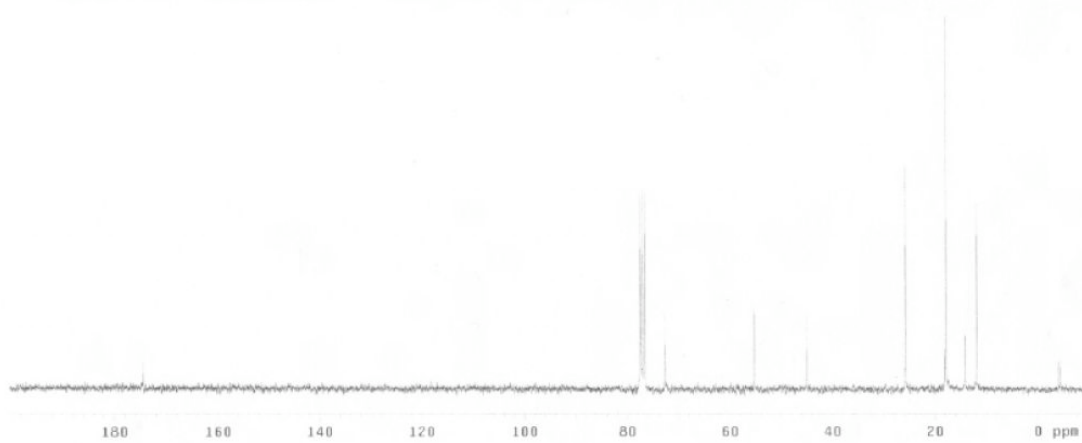

Synthesis of a 35-Member Stereoisomer Library of Bistramide A: Evaluation of Effects on Actin State, Cell Cycle and Tumor Cell Growth

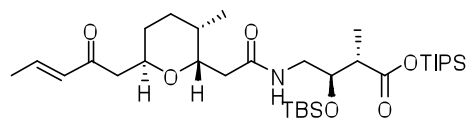

36a (400 MHz, CDCl<sub>3</sub>)

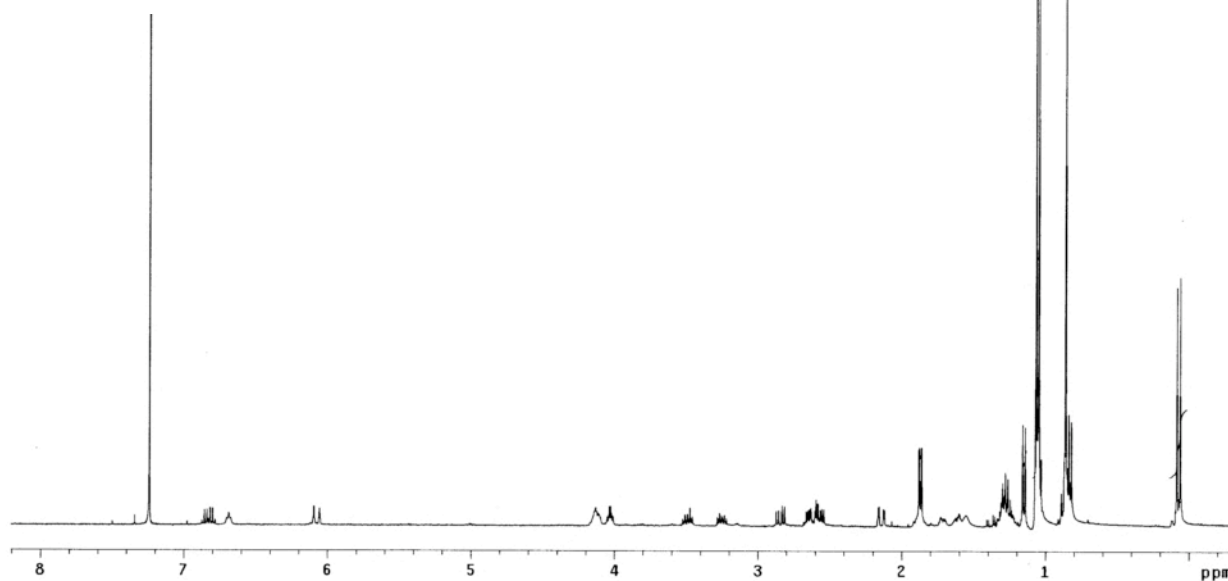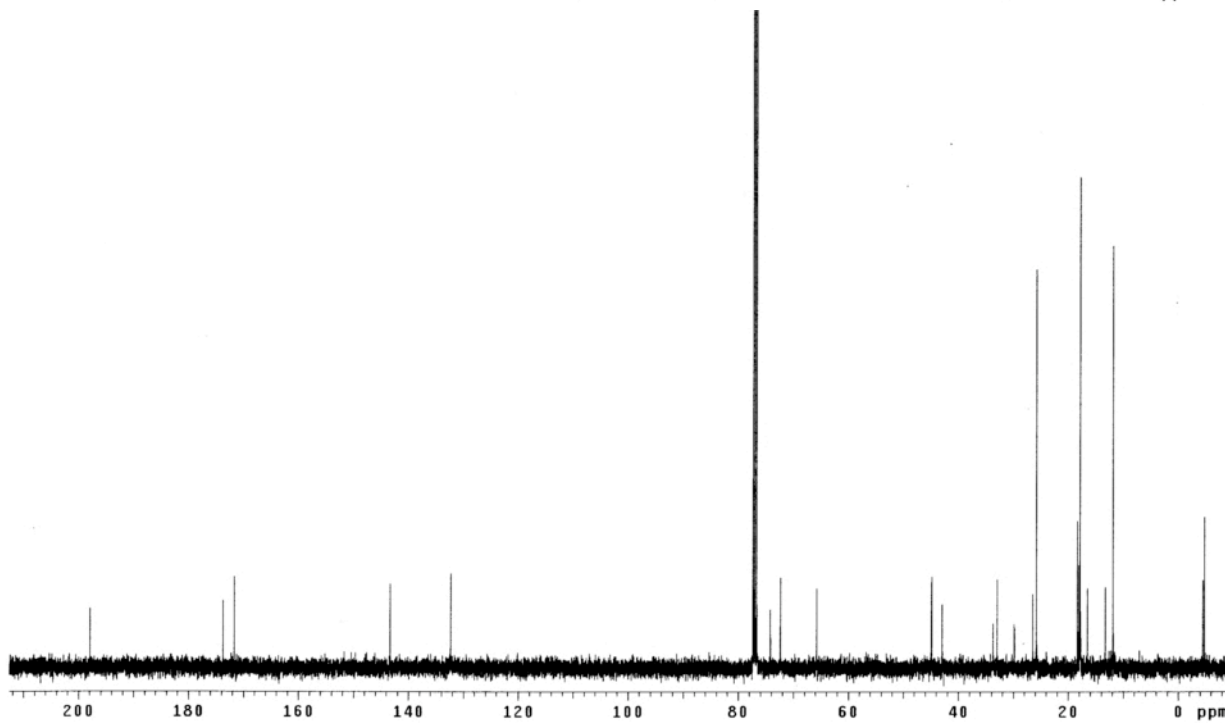

Synthesis of a 35-Member Stereoisomer Library of Bistramide A: Evaluation of Effects on Actin State, Cell Cycle and Tumor Cell Growth

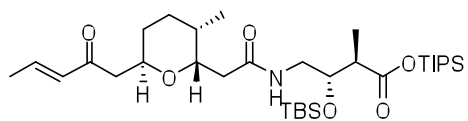

**36b** (400 MHz, CDCl<sub>3</sub>)

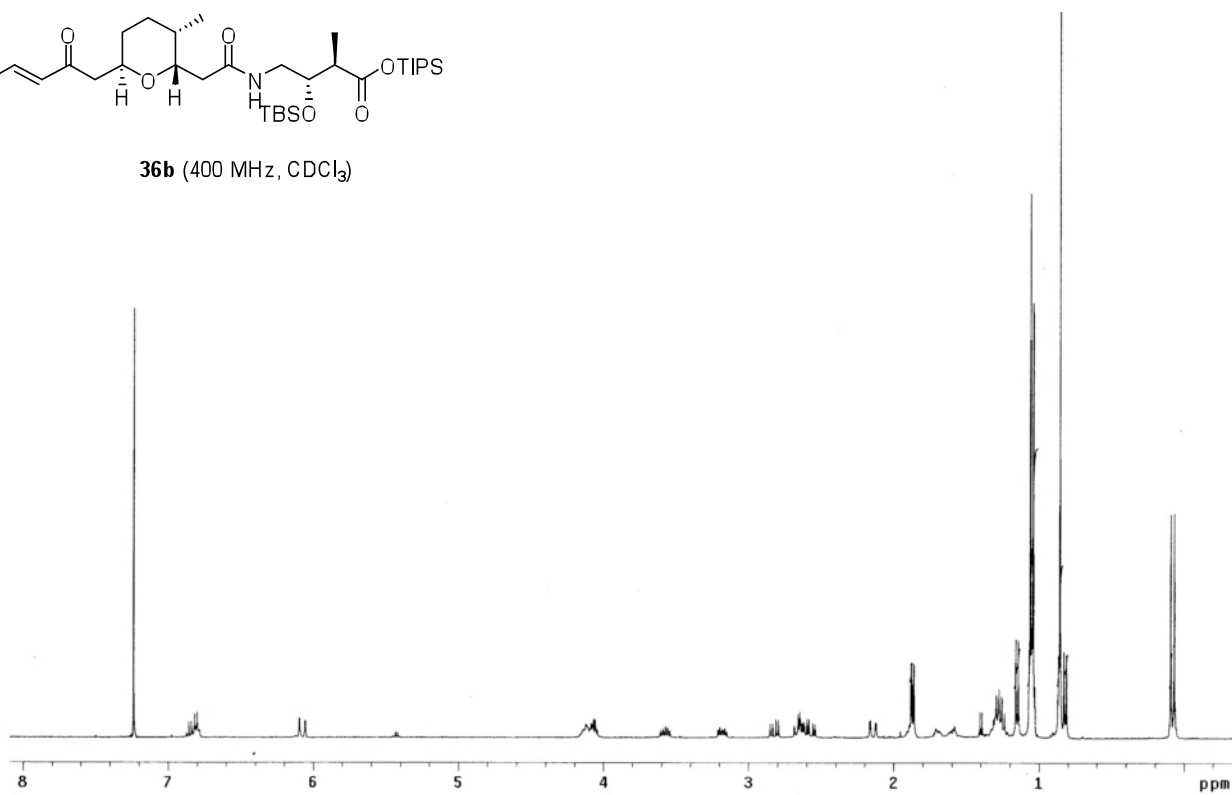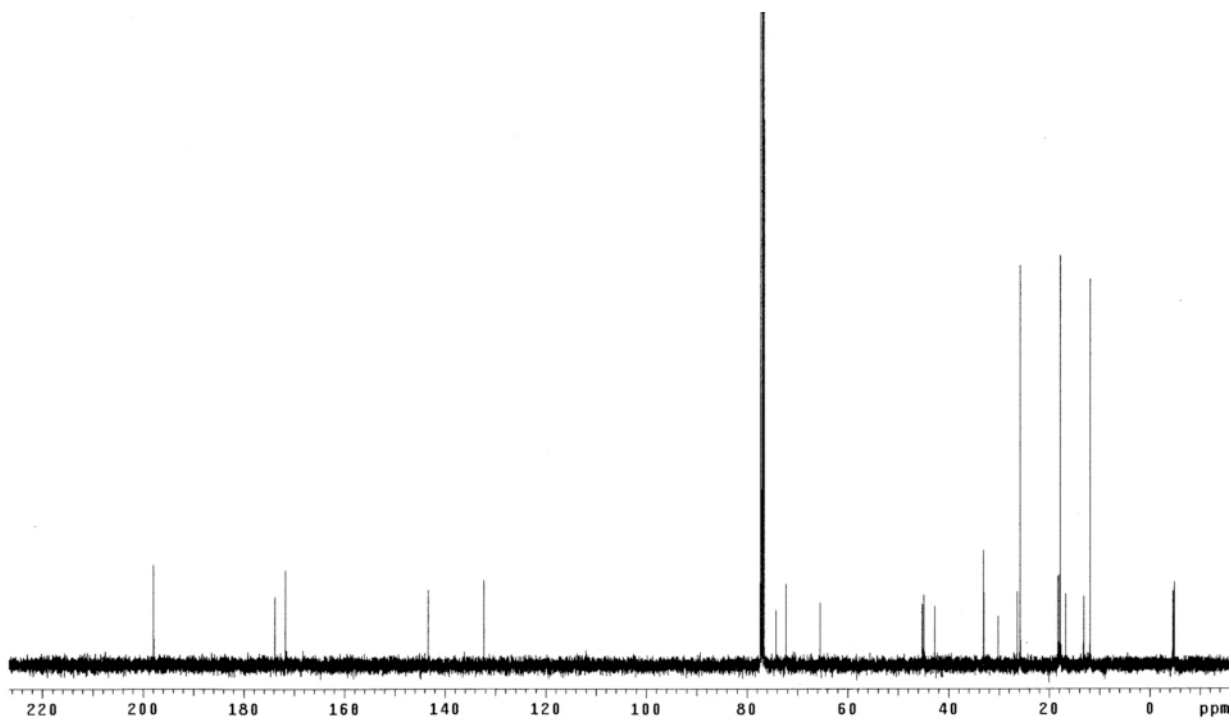

Synthesis of a 35-Member Stereoisomer Library of Bistramide A: Evaluation of Effects on Actin State, Cell Cycle and Tumor Cell Growth

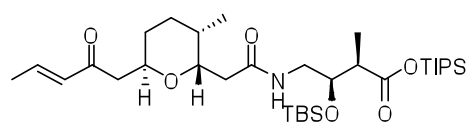

**36c** (400 MHz, CDCl<sub>3</sub>)

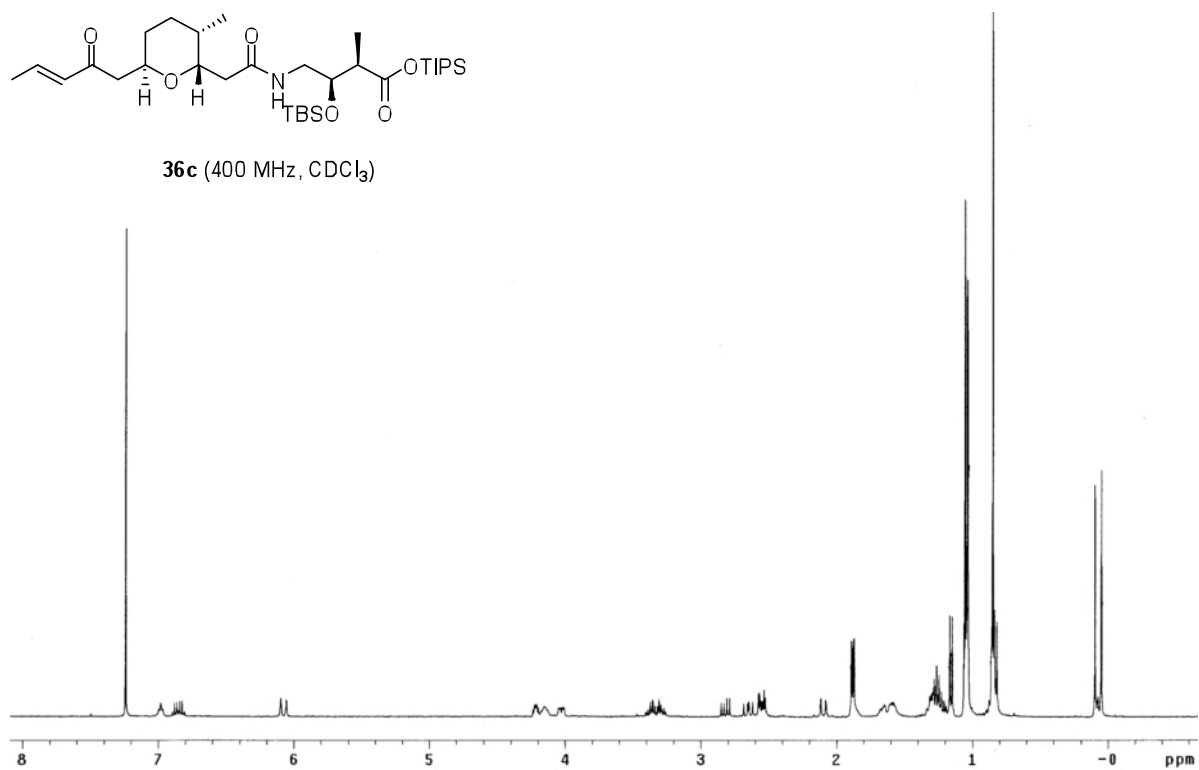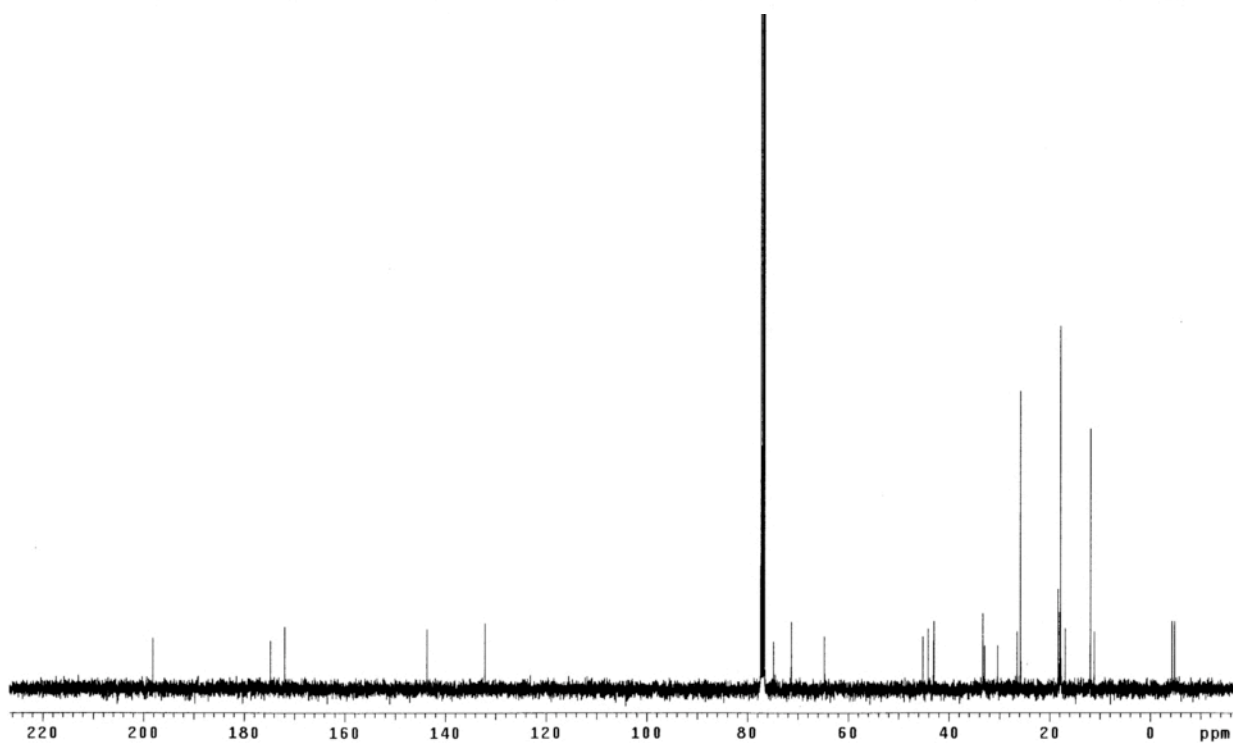

Synthesis of a 35-Member Stereoisomer Library of Bistramide A: Evaluation of Effects on Actin State, Cell Cycle and Tumor Cell Growth

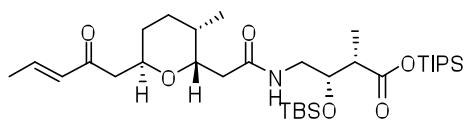

**36d** (400 MHz, CDCl<sub>3</sub>)

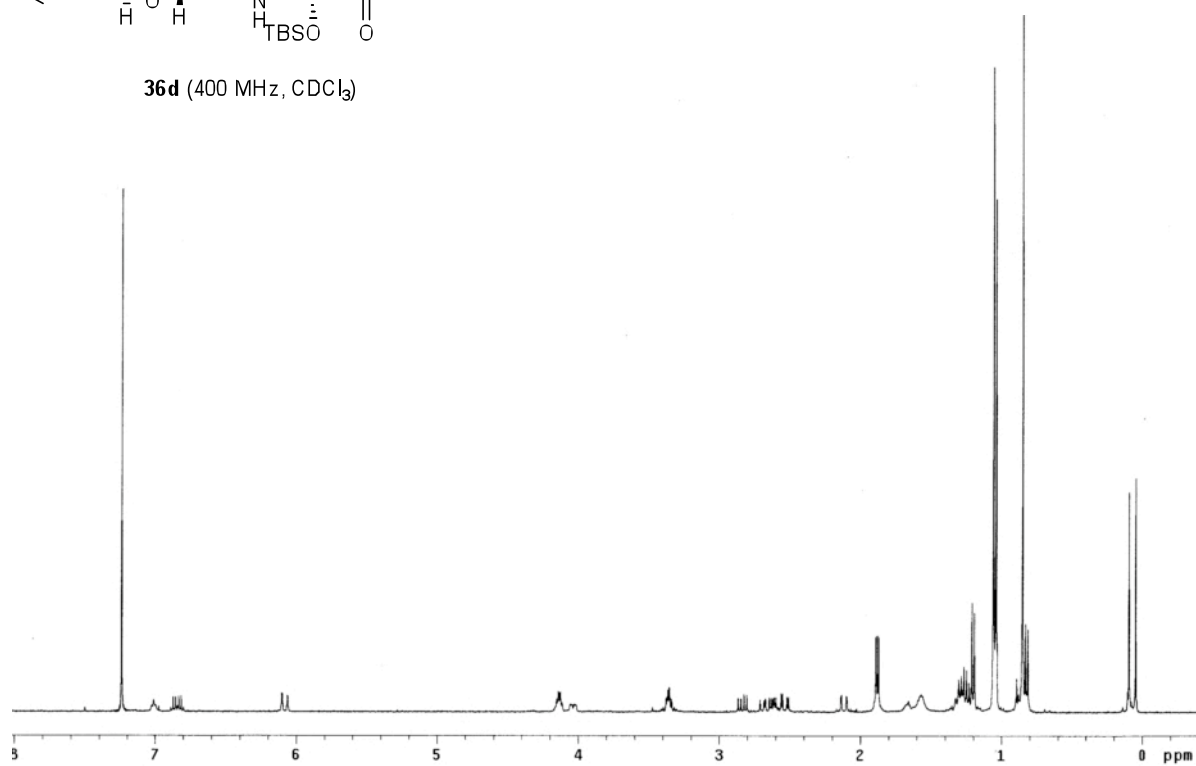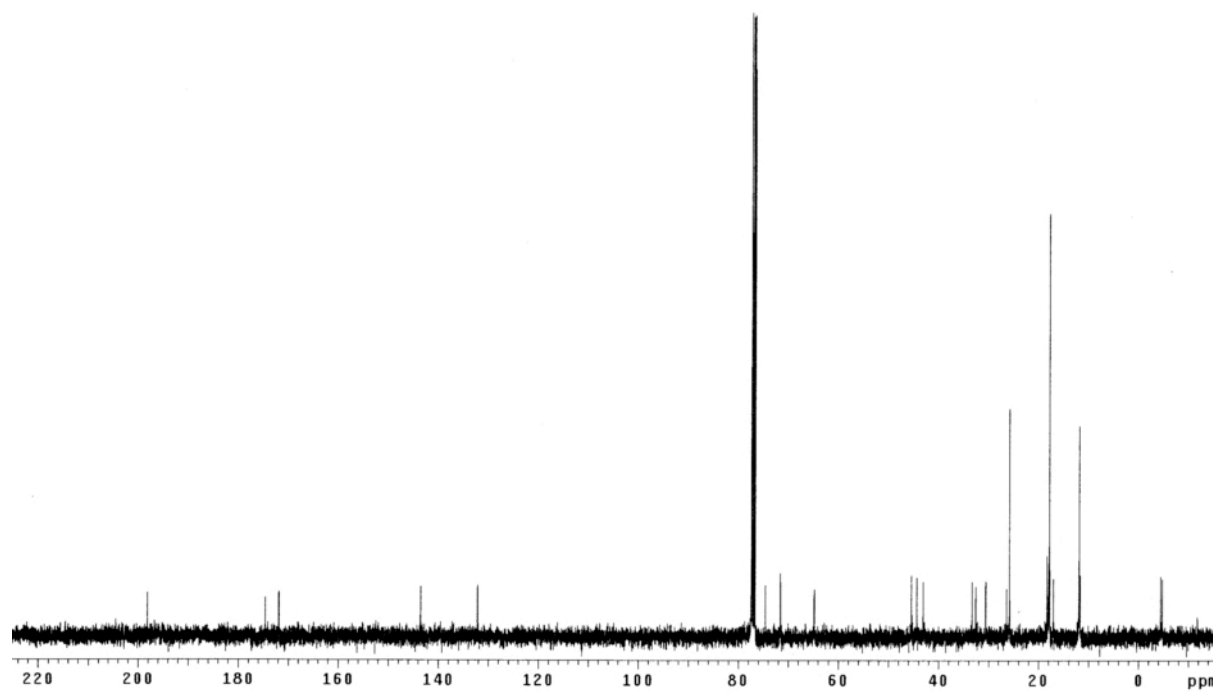

Synthesis of a 35-Member Stereoisomer Library of Bistramide A: Evaluation of Effects on Actin State, Cell Cycle and Tumor Cell Growth

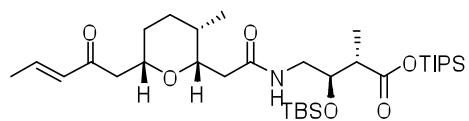

**36e** (400 MHz, CDCl<sub>3</sub>)

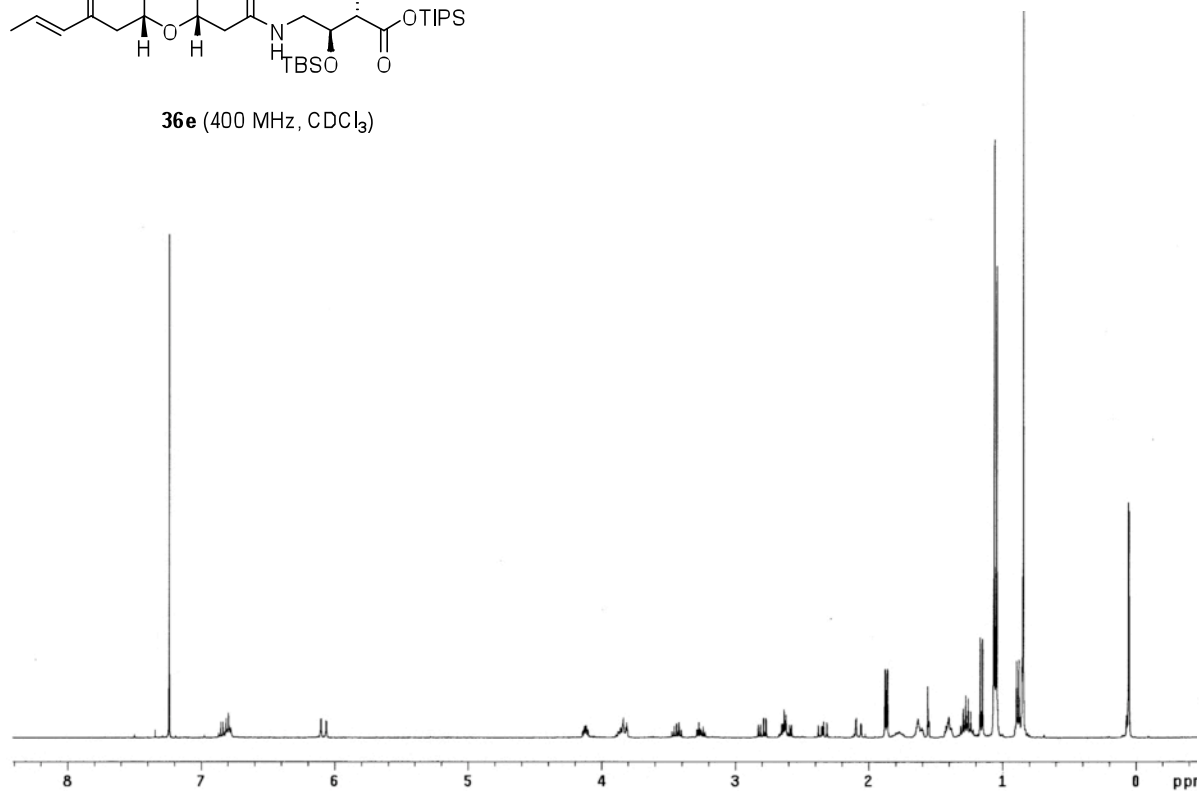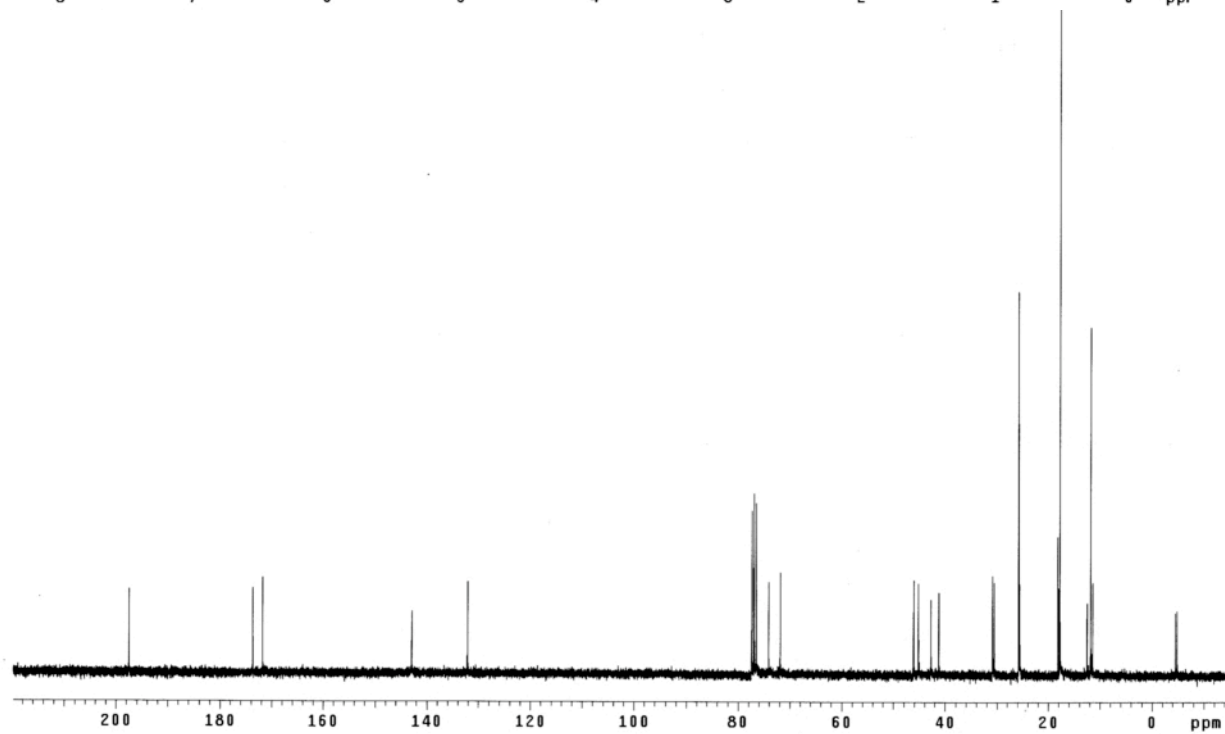



Synthesis of a 35-Member Stereoisomer Library of Bistramide A: Evaluation of Effects on Actin State, Cell Cycle and Tumor Cell Growth

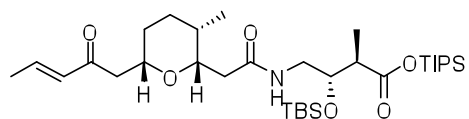

**36f** (400 MHz, CDCl<sub>3</sub>)

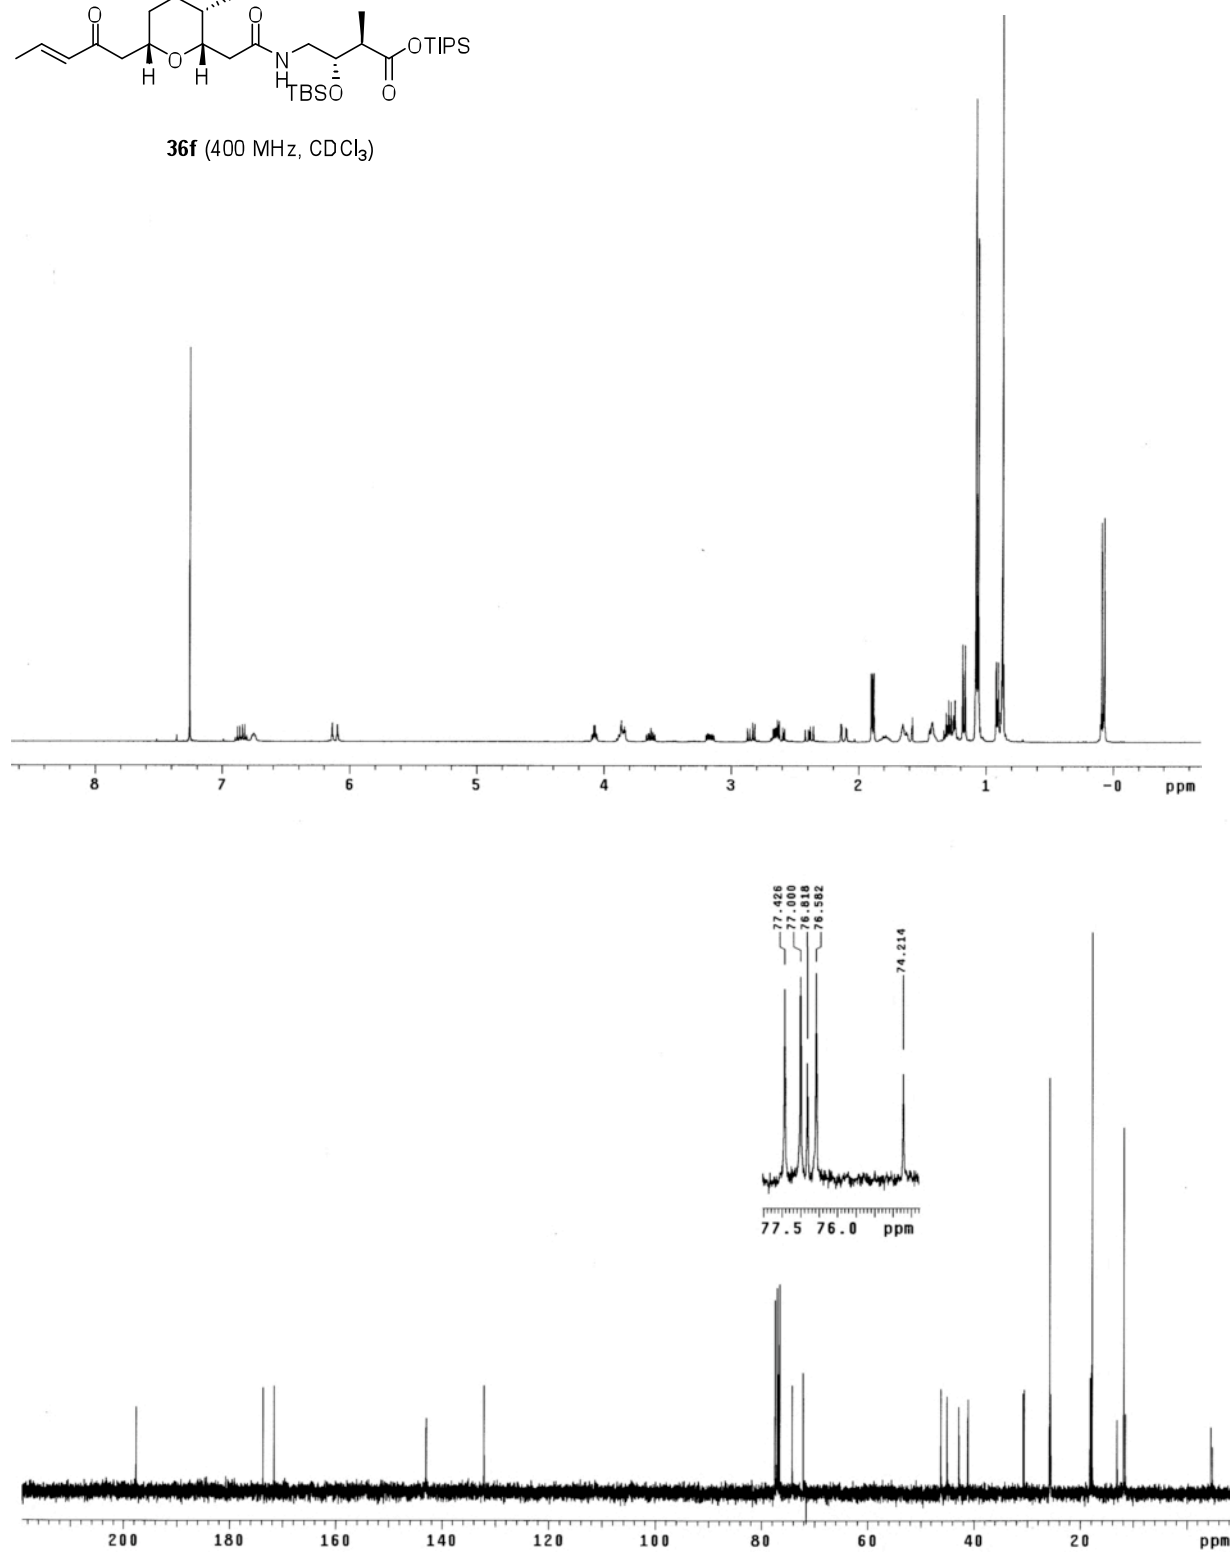

Synthesis of a 35-Member Stereoisomer Library of Bistramide A: Evaluation of Effects on Actin State, Cell Cycle and Tumor Cell Growth

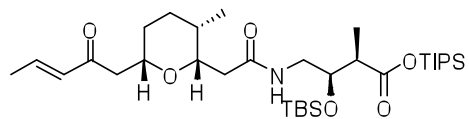

**36g** (400 MHz, CDCl<sub>3</sub>)

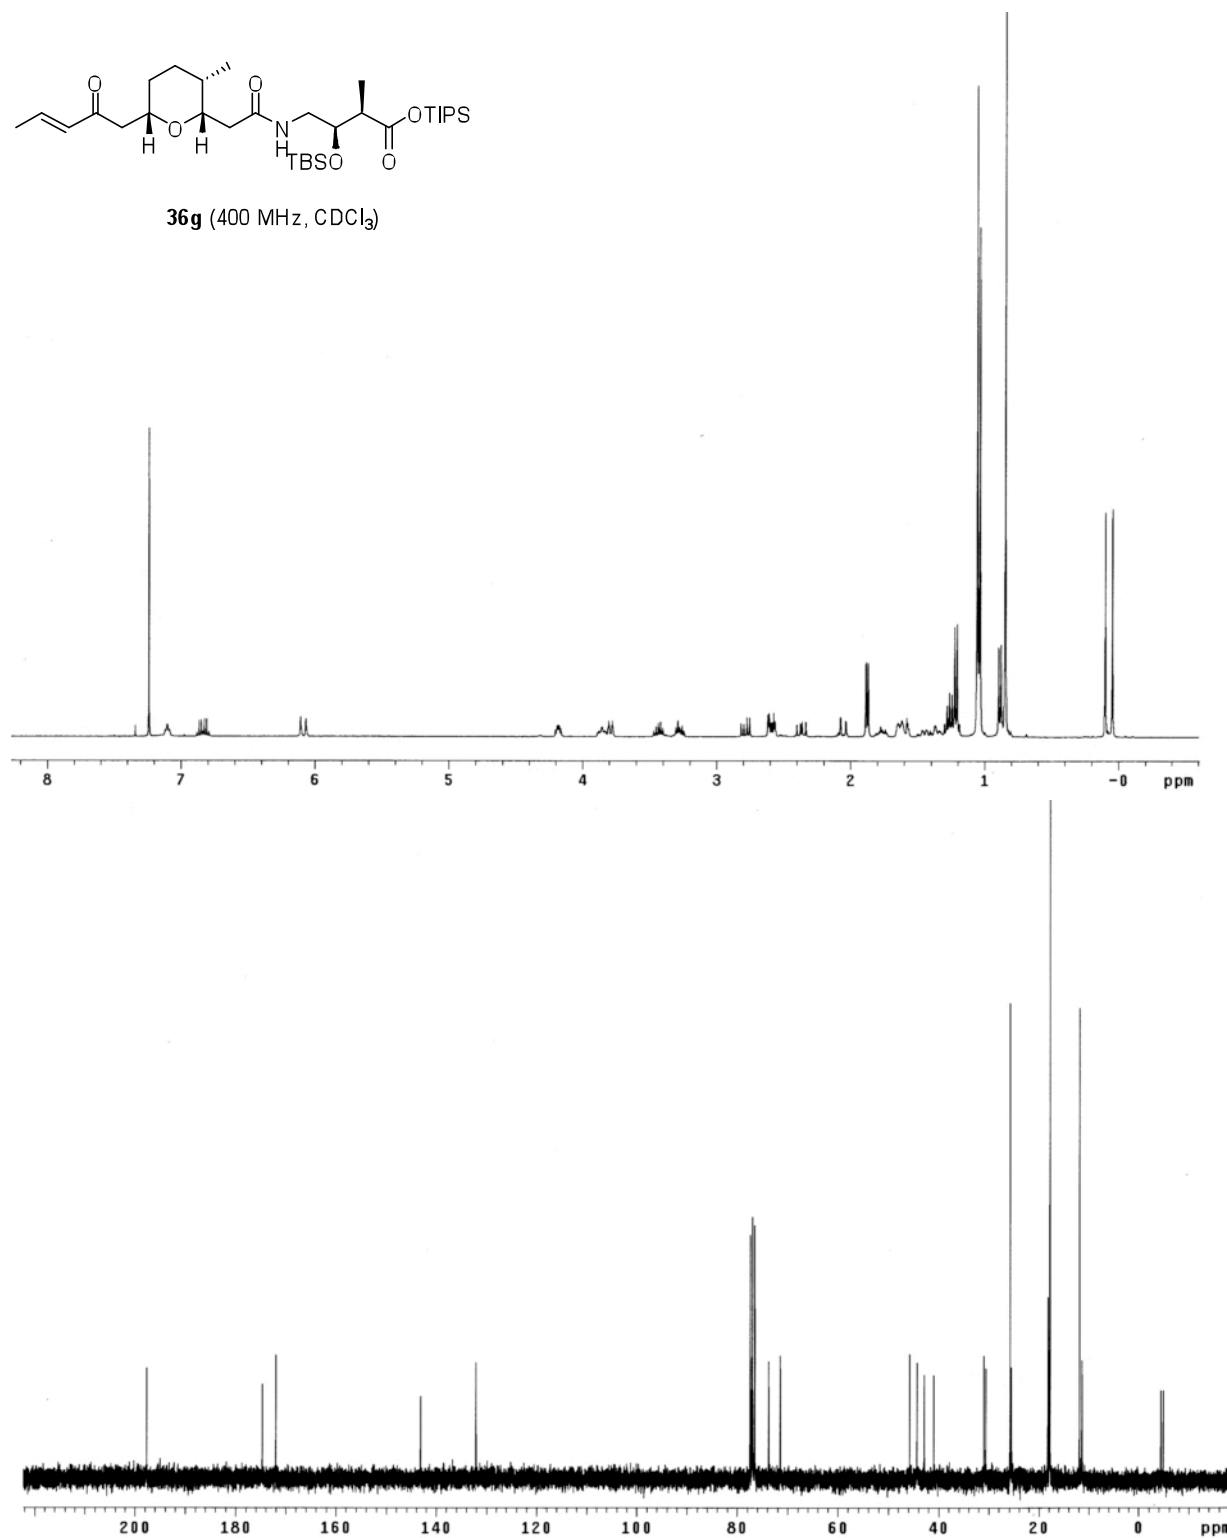

Synthesis of a 35-Member Stereoisomer Library of Bistramide A: Evaluation of Effects on Actin State, Cell Cycle and Tumor Cell Growth

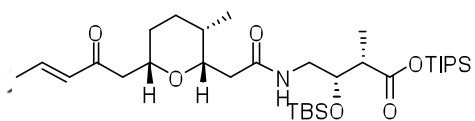

**36h** (400 MHz, CDCl<sub>3</sub>)

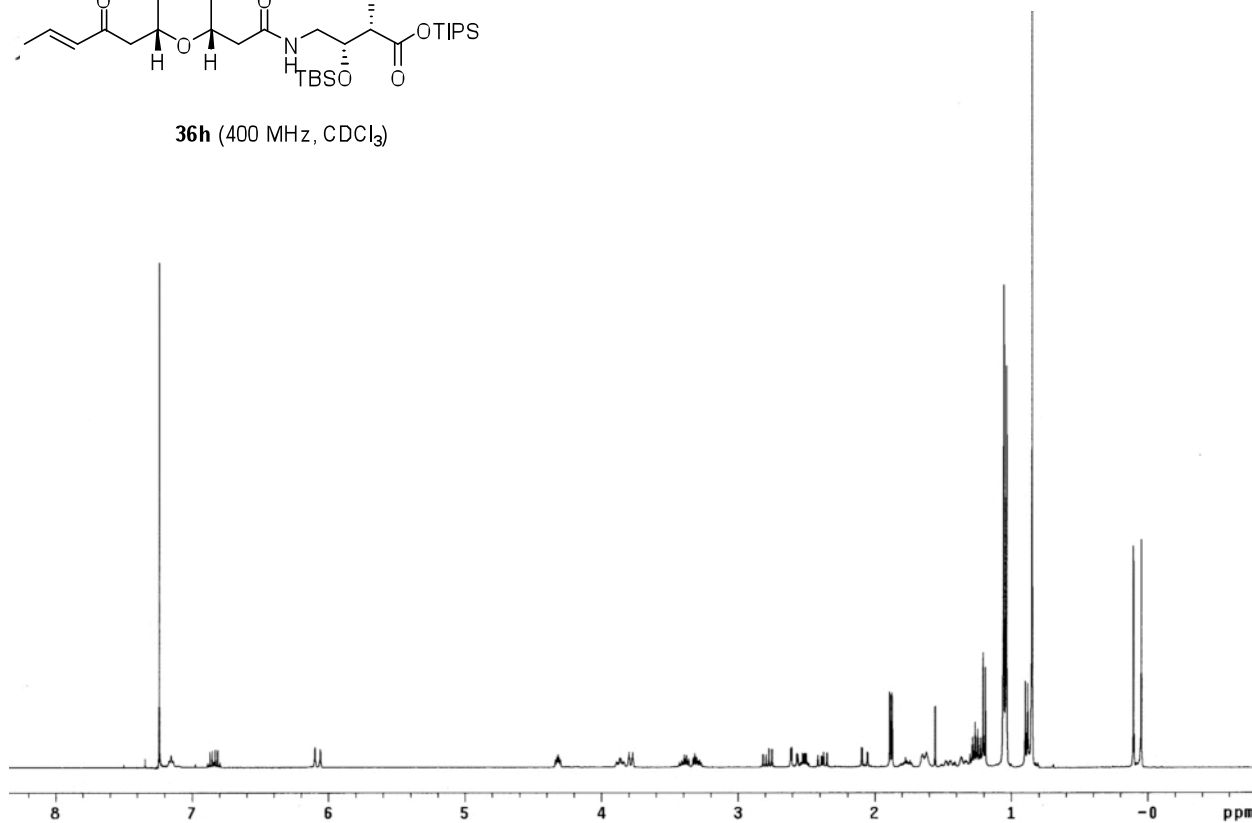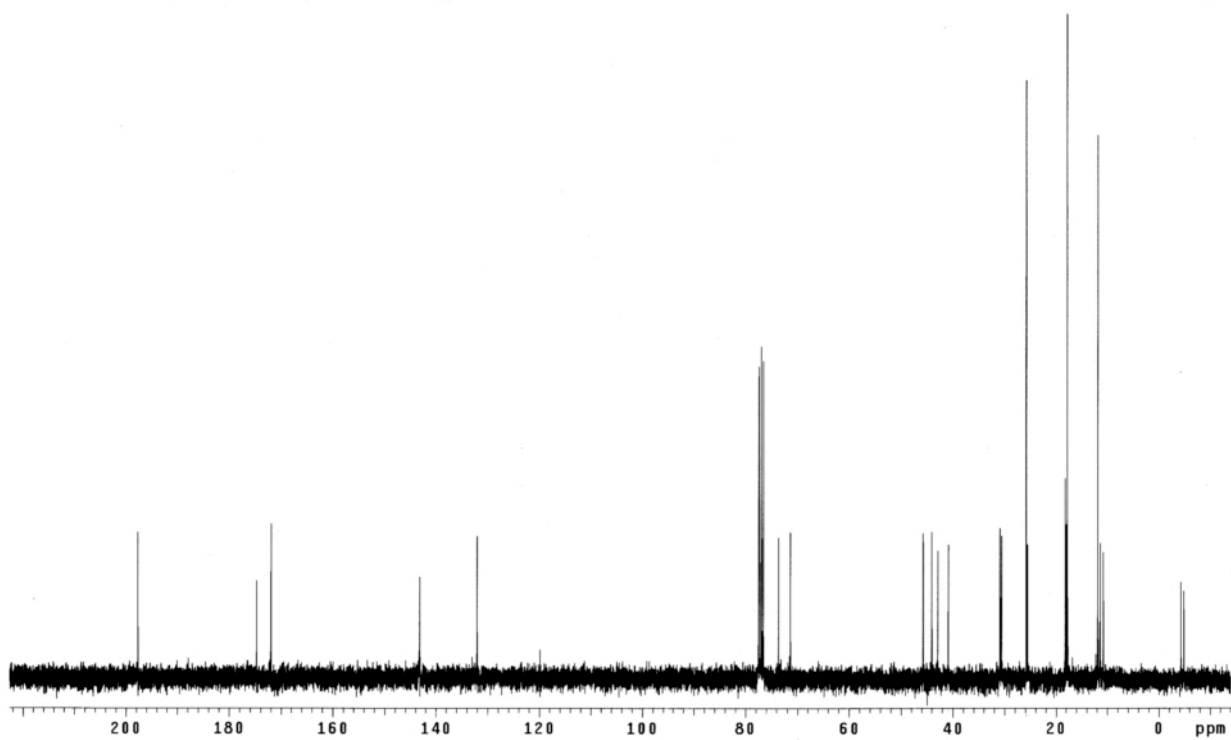

Synthesis of a 35-Member Stereoisomer Library of Bistramide A: Evaluation of Effects on Actin State, Cell Cycle and Tumor Cell Growth

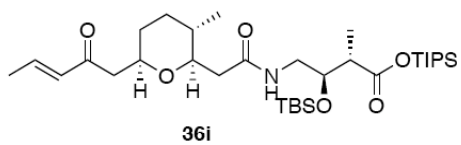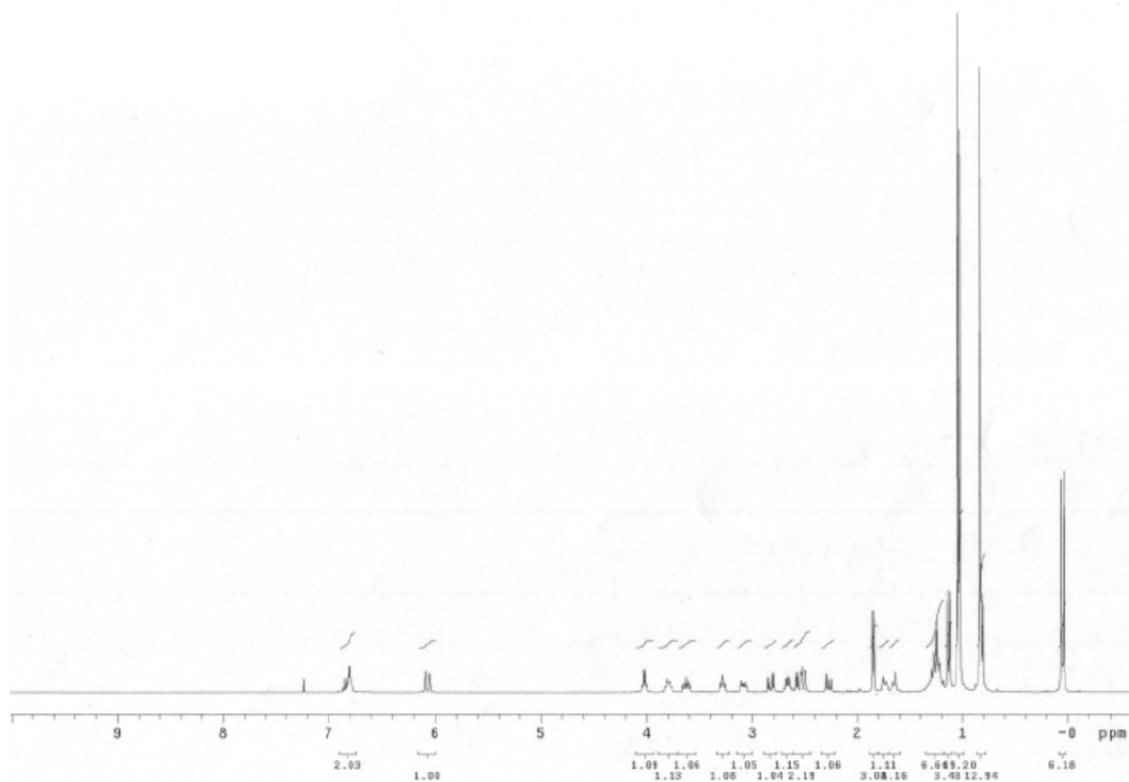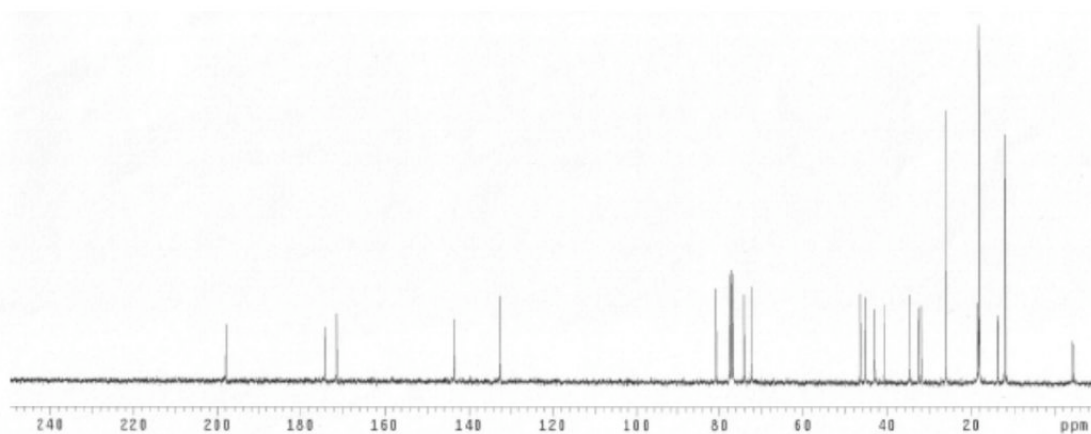

Synthesis of a 35-Member Stereoisomer Library of Bistramide A: Evaluation of Effects on Actin State, Cell Cycle and Tumor Cell Growth

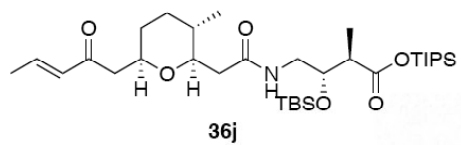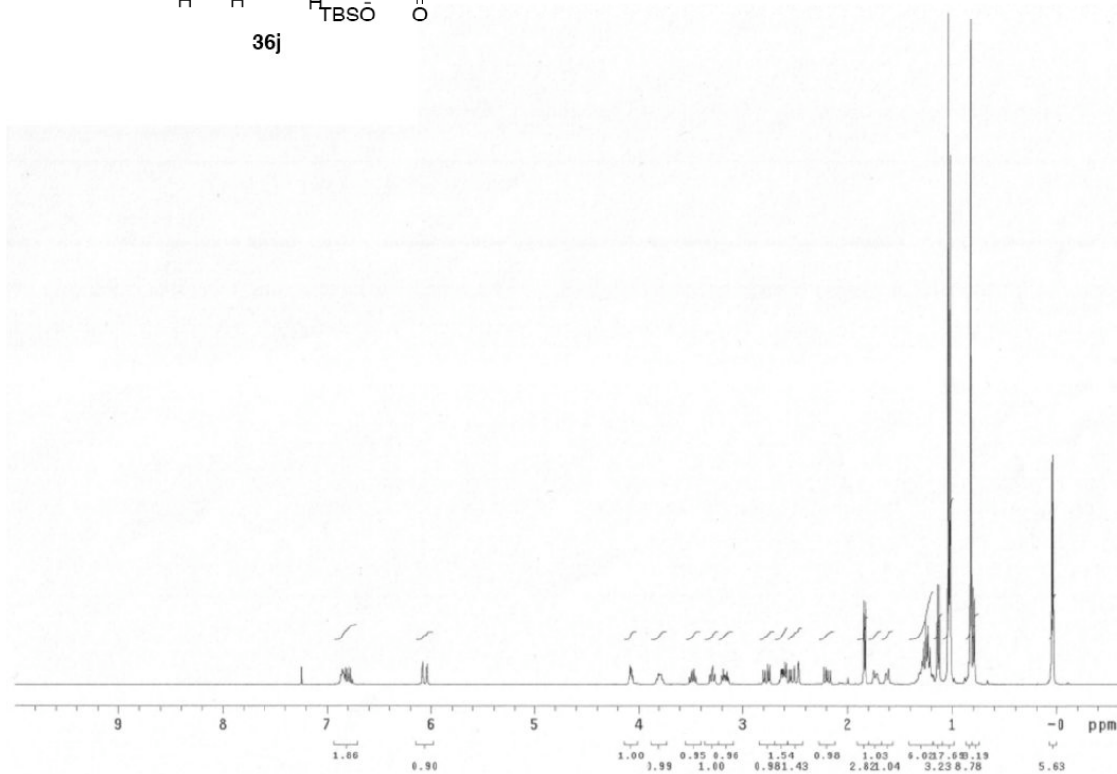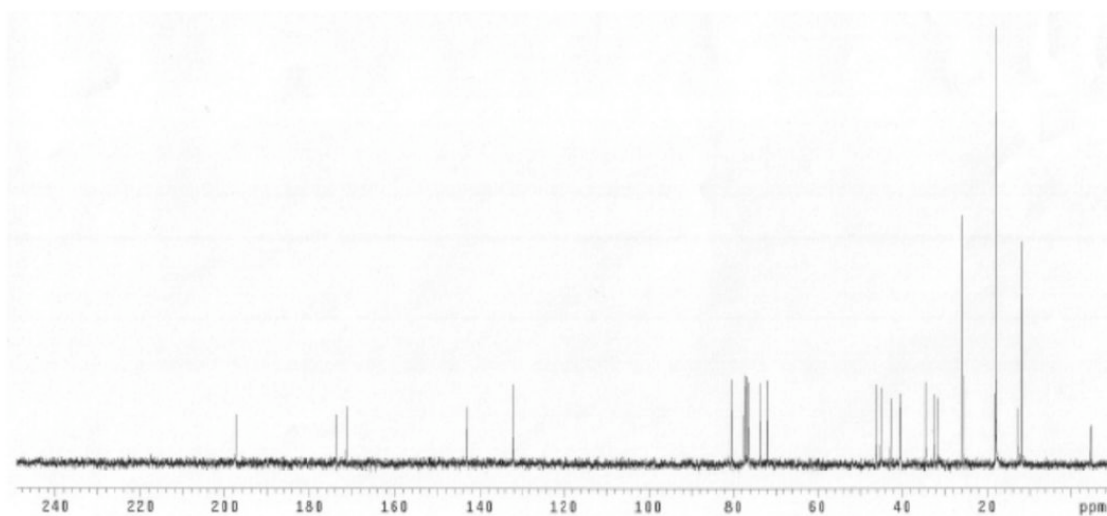

Synthesis of a 35-Member Stereoisomer Library of Bistramide A: Evaluation of Effects on Actin State, Cell Cycle and Tumor Cell Growth

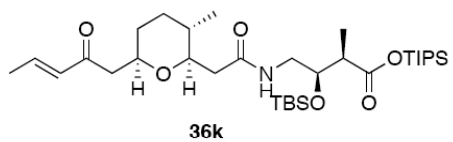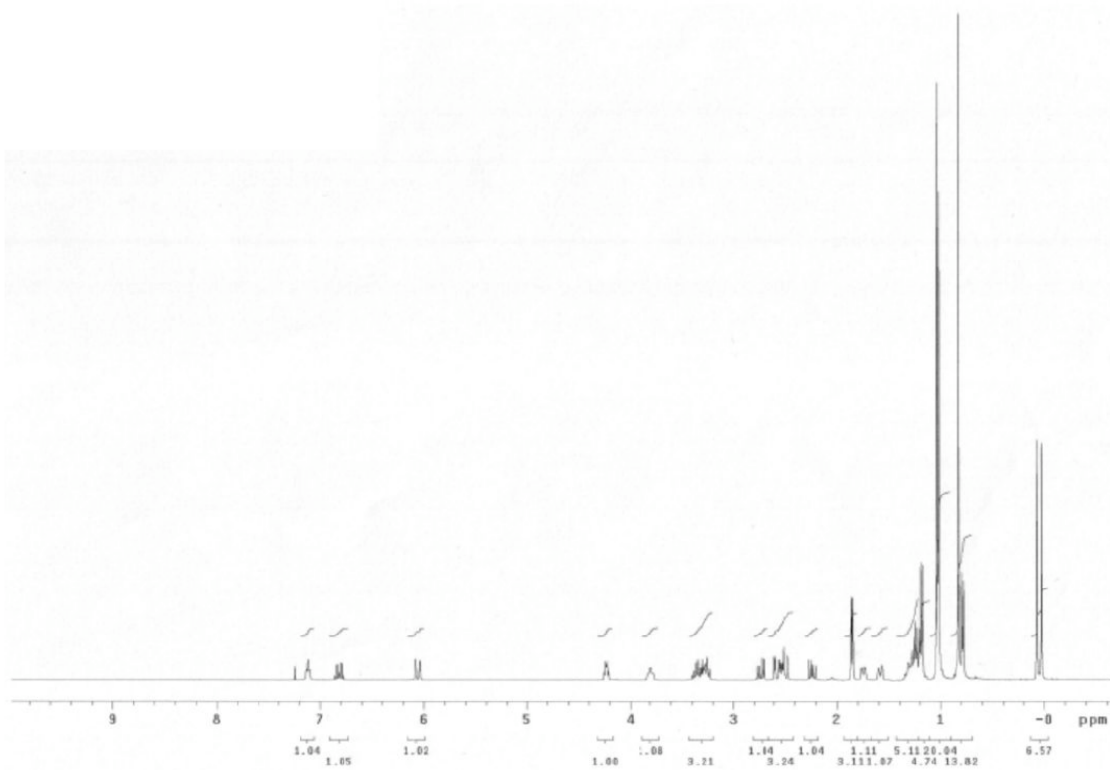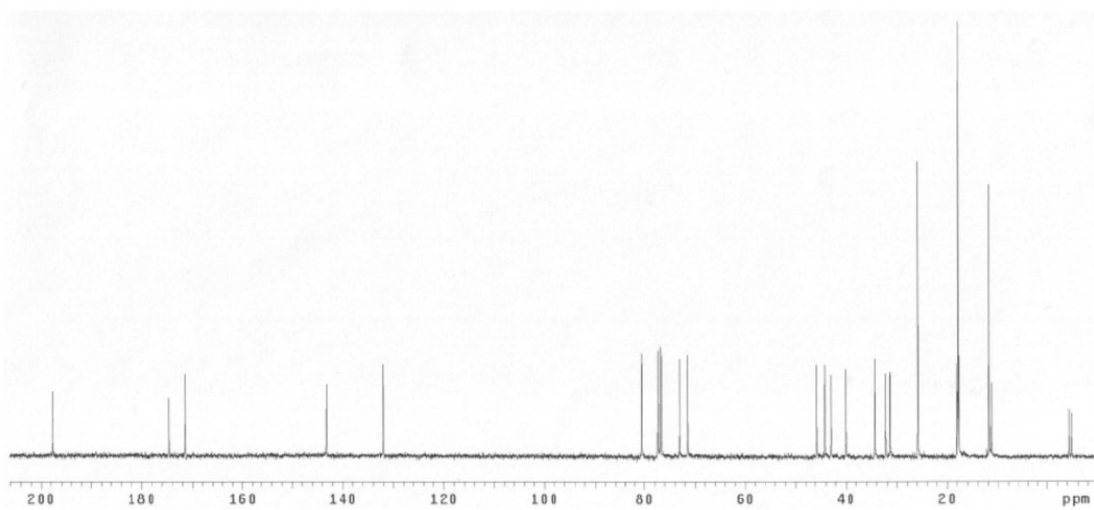

Synthesis of a 35-Member Stereoisomer Library of Bistramide A: Evaluation of Effects on Actin State, Cell Cycle and Tumor Cell Growth

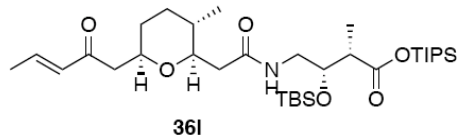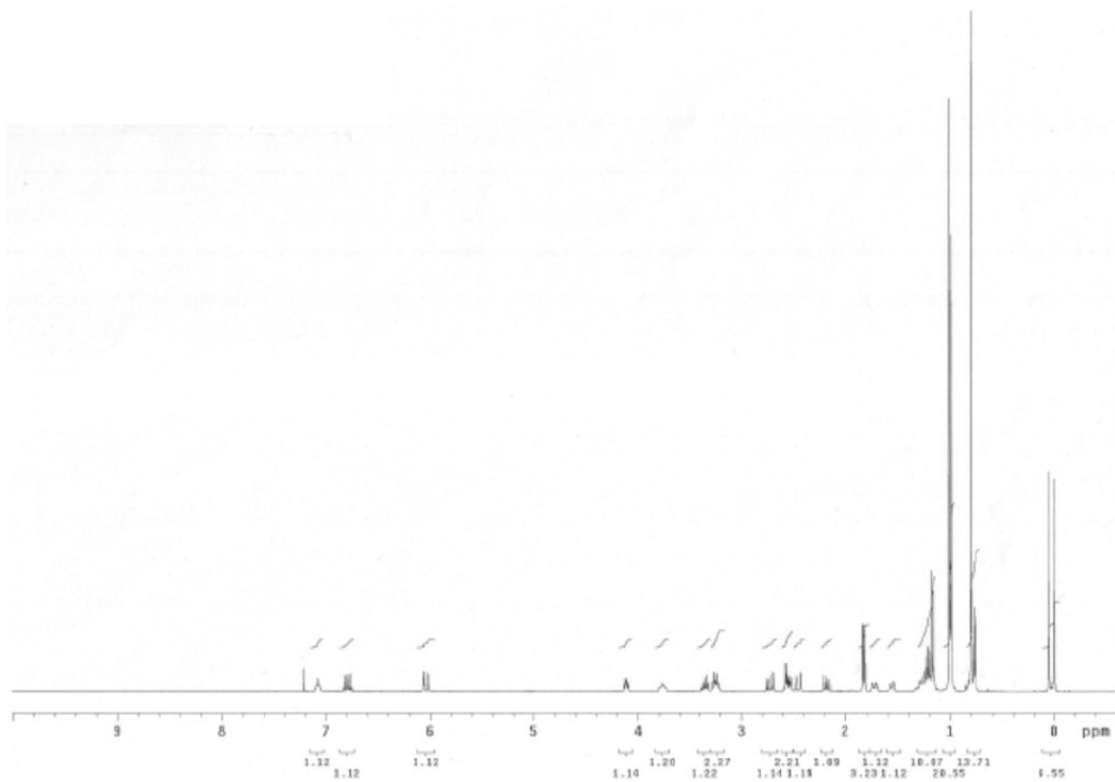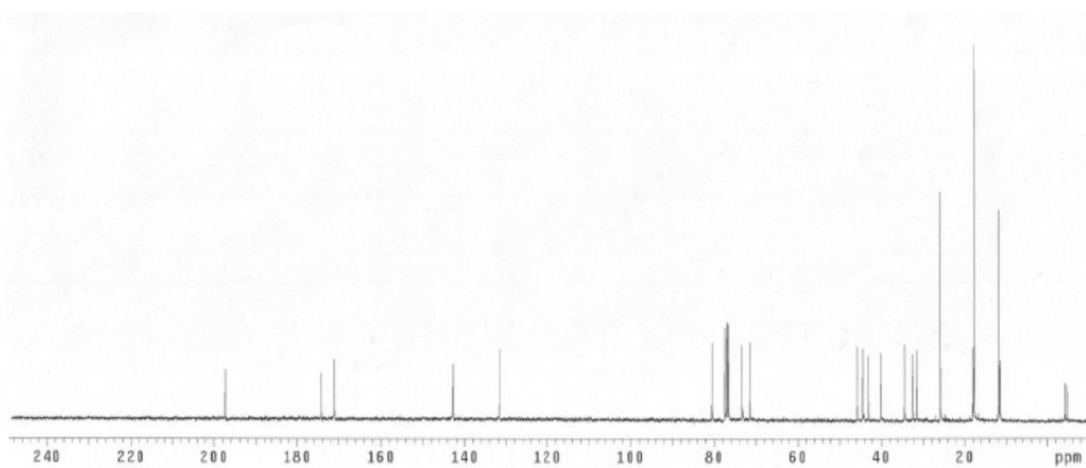

Synthesis of a 35-Member Stereoisomer Library of Bistramide A: Evaluation of Effects on Actin State, Cell Cycle and Tumor Cell Growth

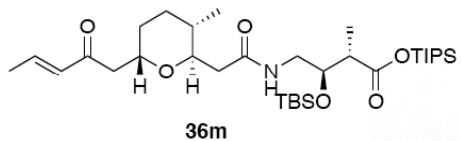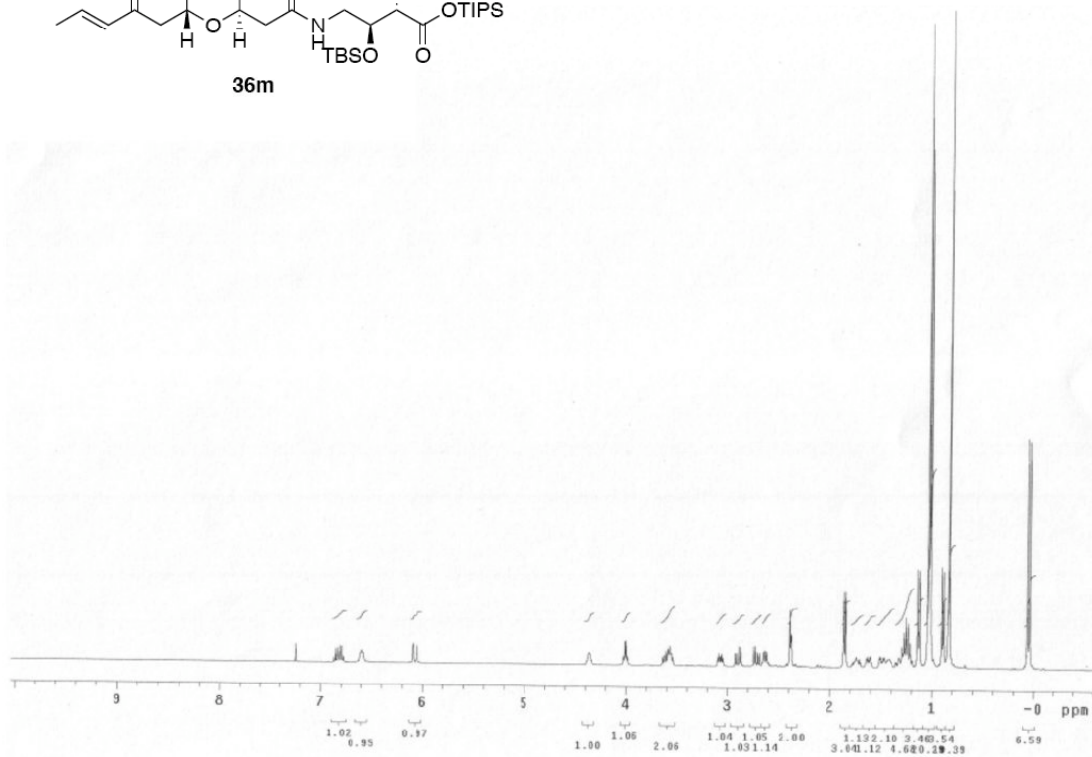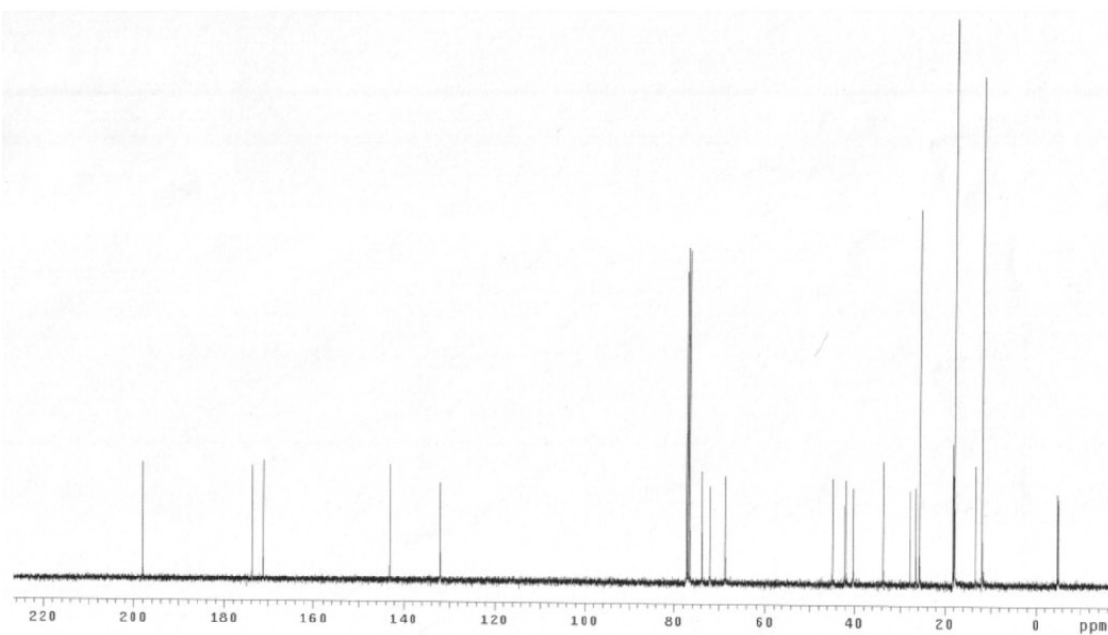



Synthesis of a 35-Member Stereoisomer Library of Bistramide A: Evaluation of Effects on Actin State, Cell Cycle and Tumor Cell Growth

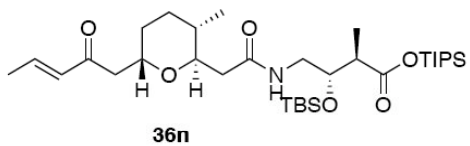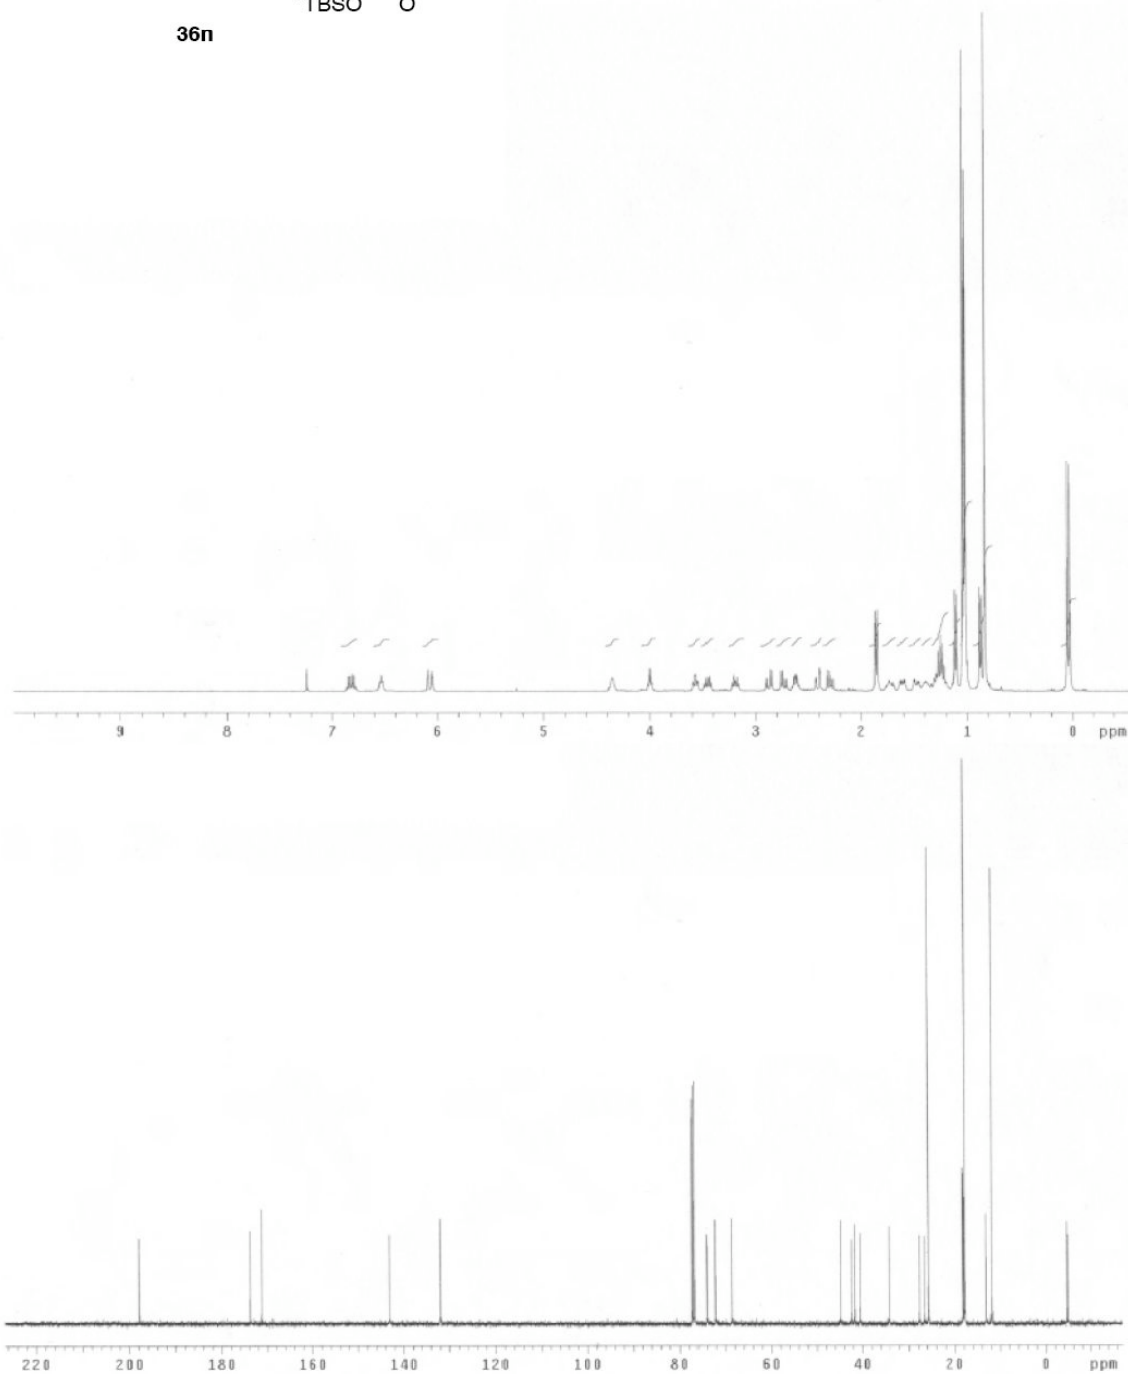

Synthesis of a 35-Member Stereoisomer Library of Bistramide A: Evaluation of Effects on Actin State, Cell Cycle and Tumor Cell Growth

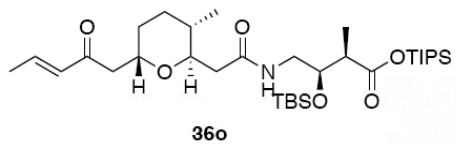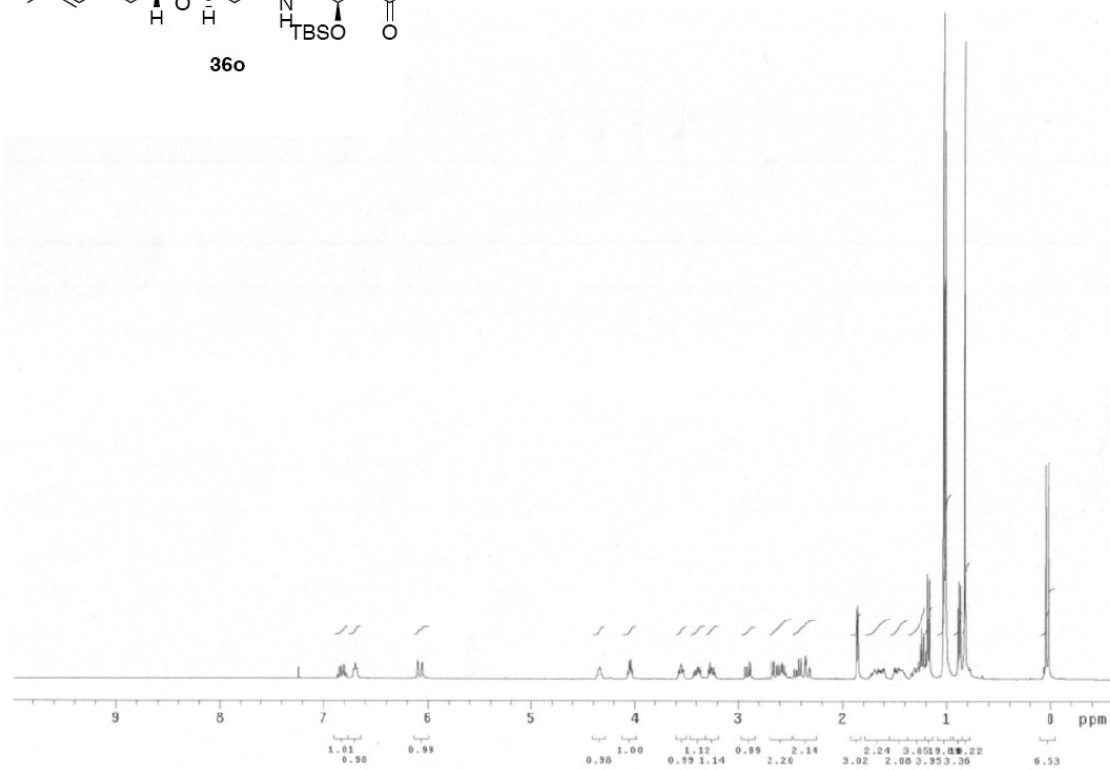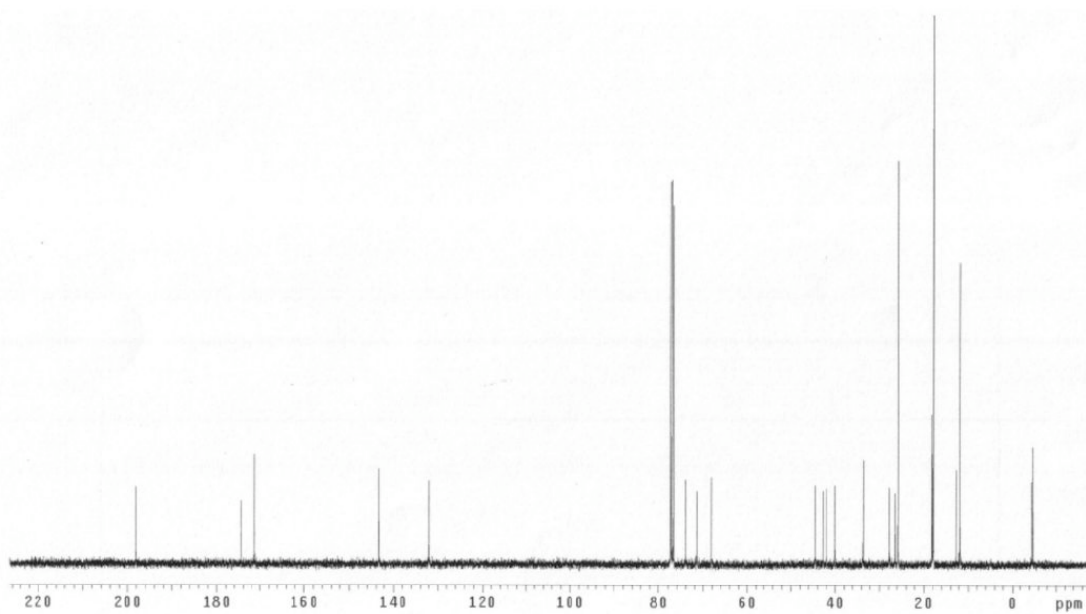

Synthesis of a 35-Member Stereoisomer Library of Bistramide A: Evaluation of Effects on Actin State, Cell Cycle and Tumor Cell Growth

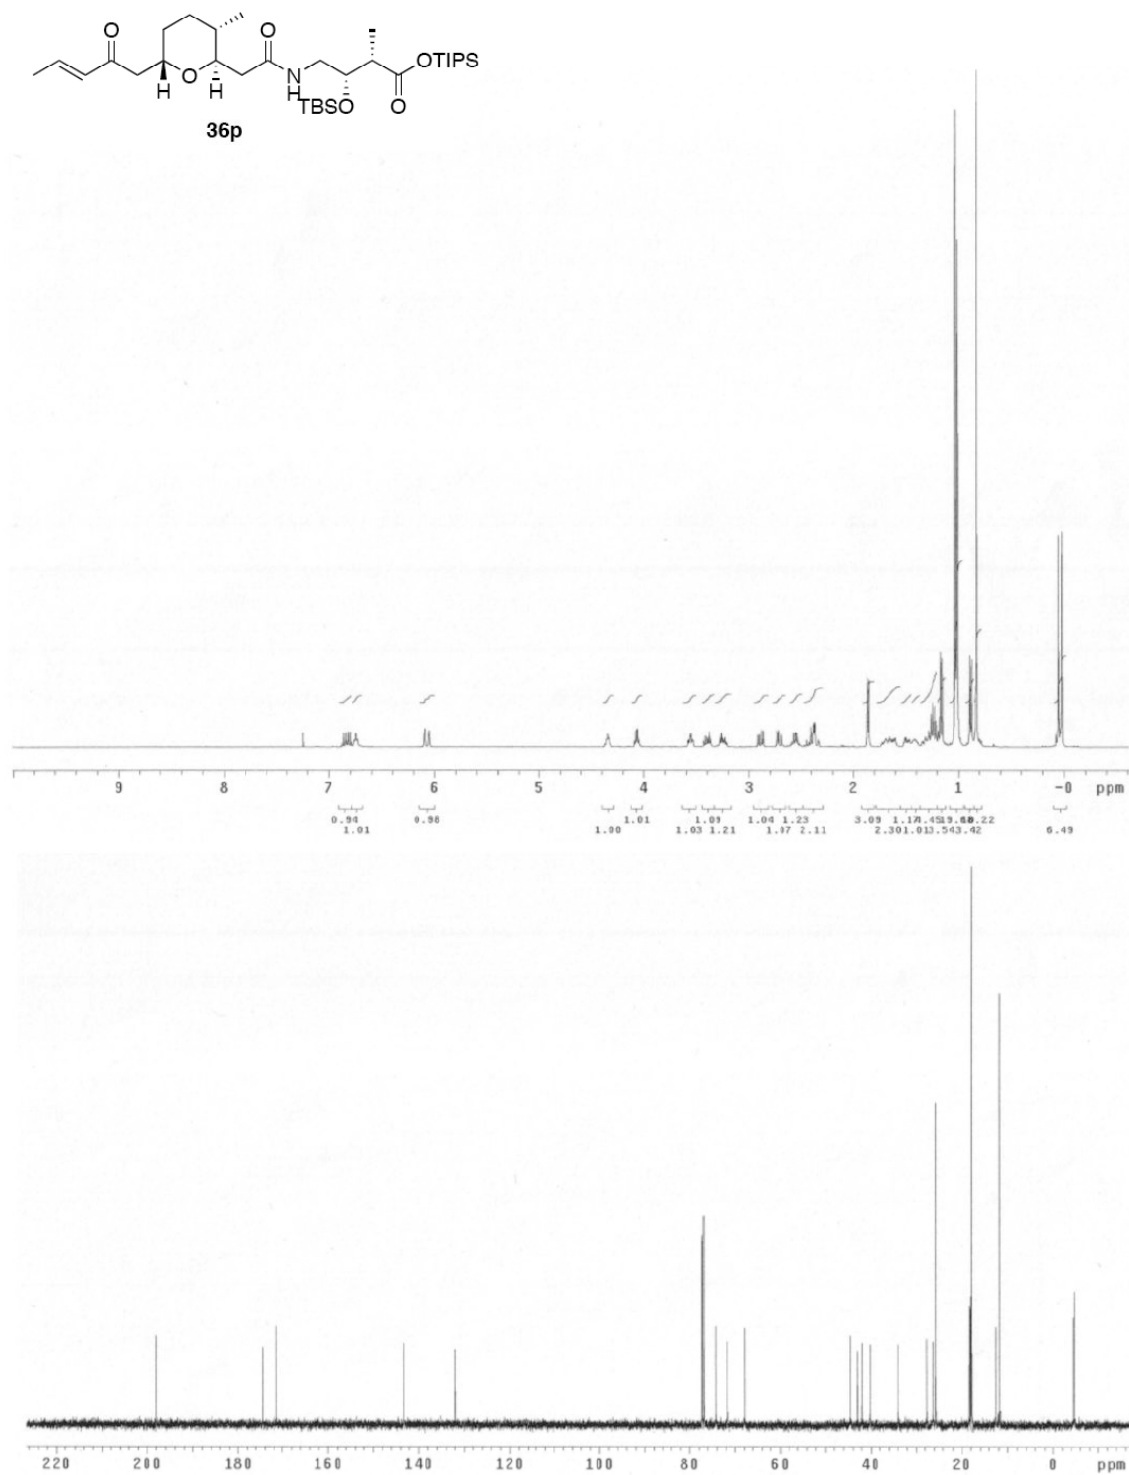

Synthesis of a 35-Member Stereoisomer Library of Bistramide A: Evaluation of Effects on Actin State, Cell Cycle and Tumor Cell Growth

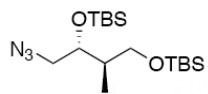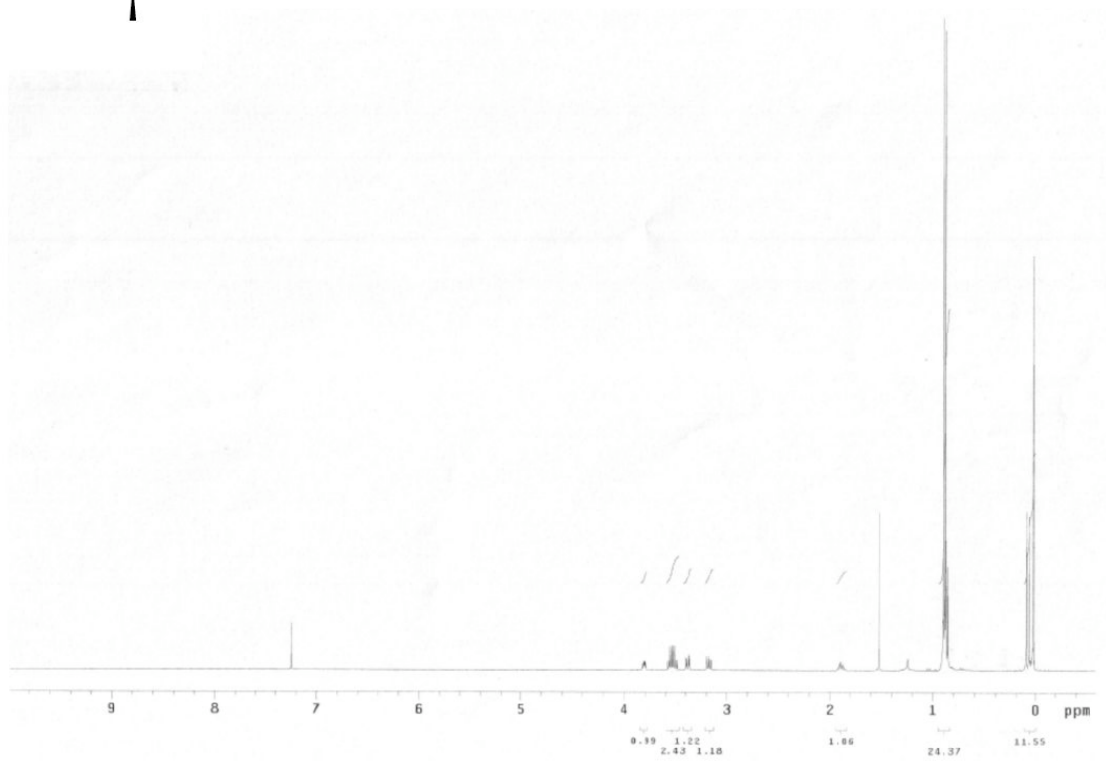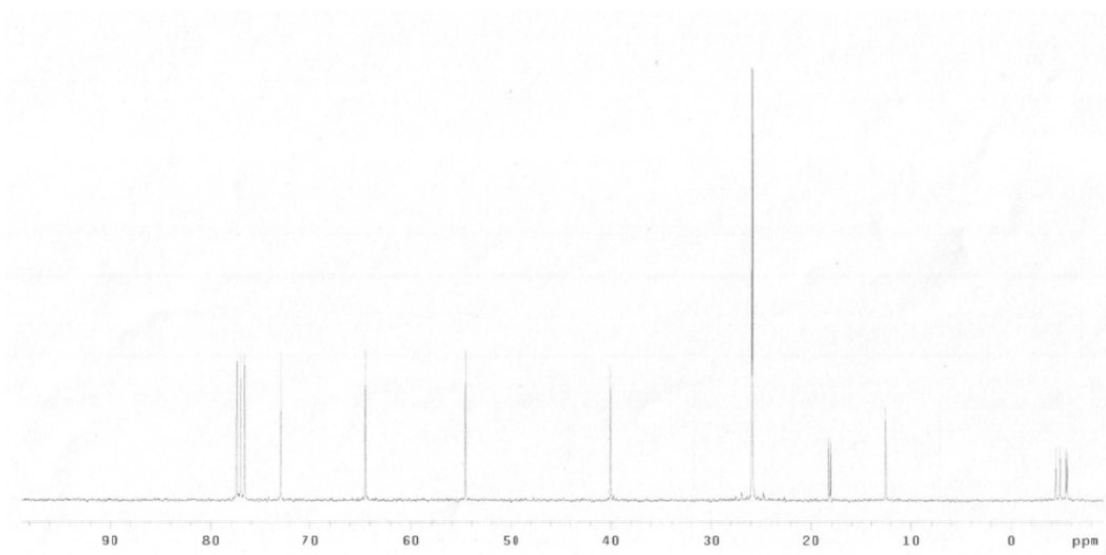

Synthesis of a 35-Member Stereoisomer Library of Bistramide A: Evaluation of Effects on Actin State, Cell Cycle and Tumor Cell Growth

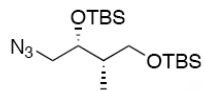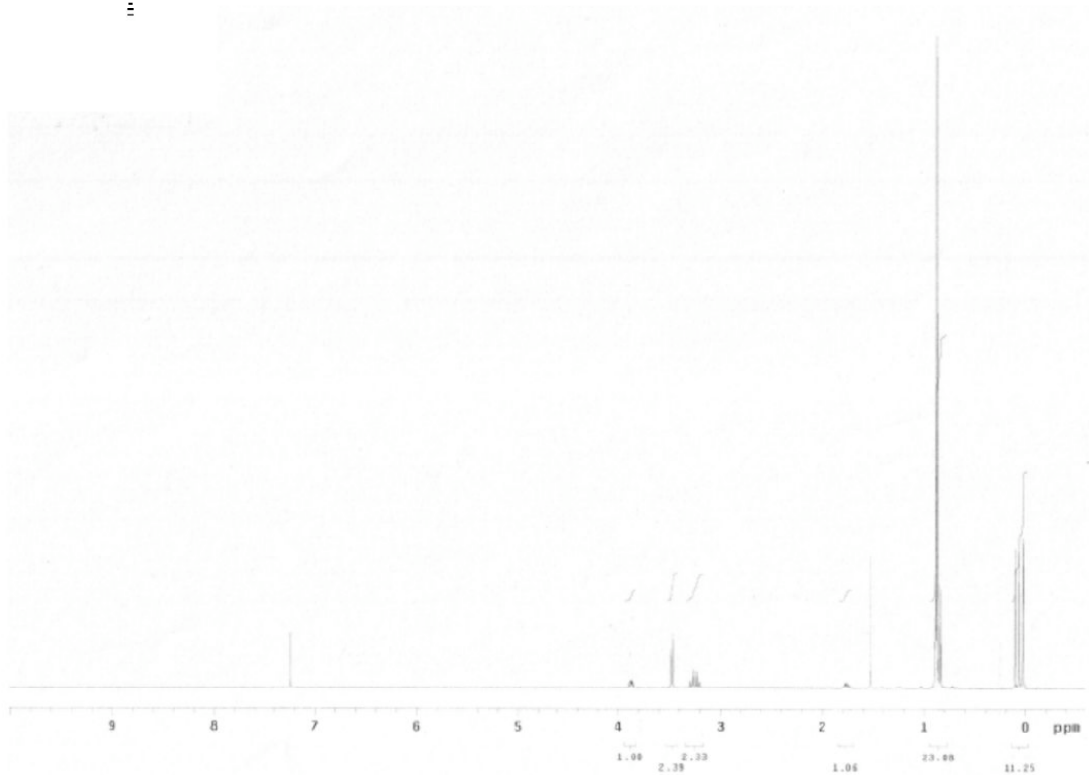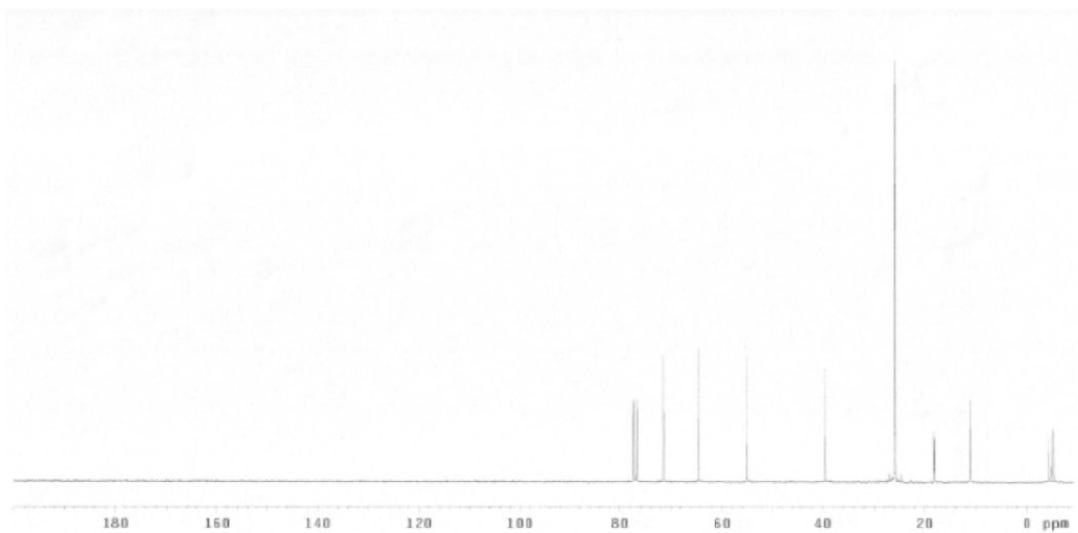

Synthesis of a 35-Member Stereoisomer Library of Bistramide A: Evaluation of Effects on Actin State, Cell Cycle and Tumor Cell Growth

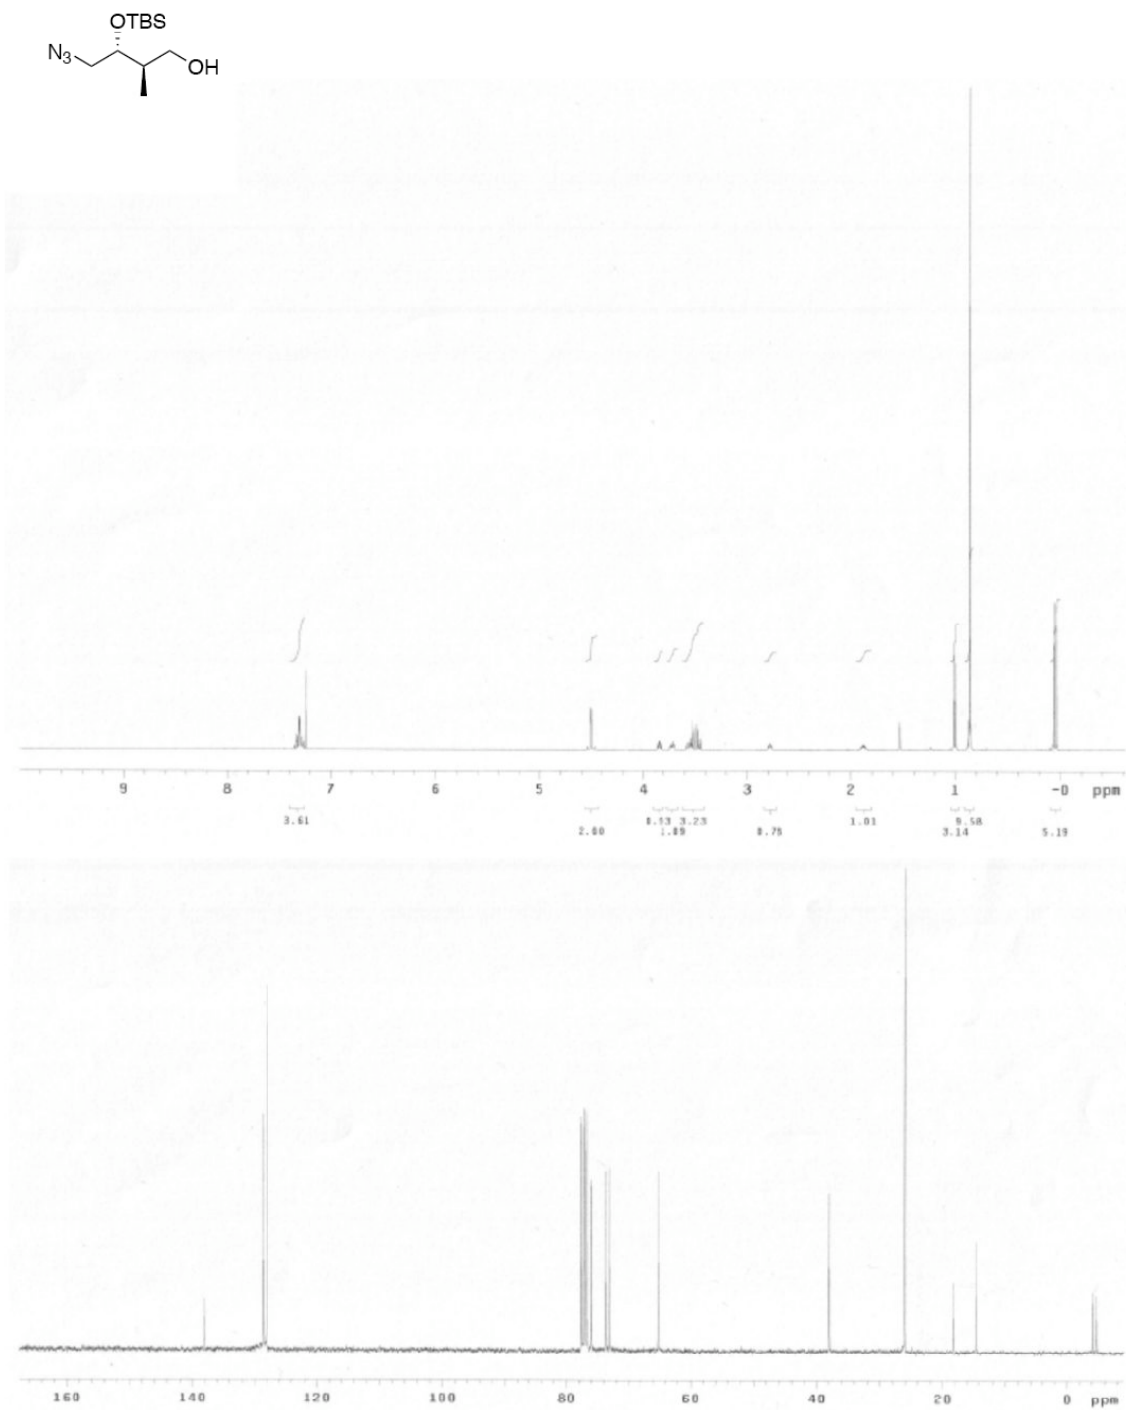



Synthesis of a 35-Member Stereoisomer Library of Bistramide A: Evaluation of Effects on Actin State, Cell Cycle and Tumor Cell Growth

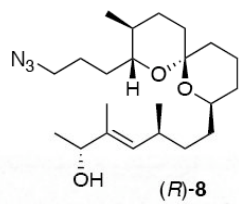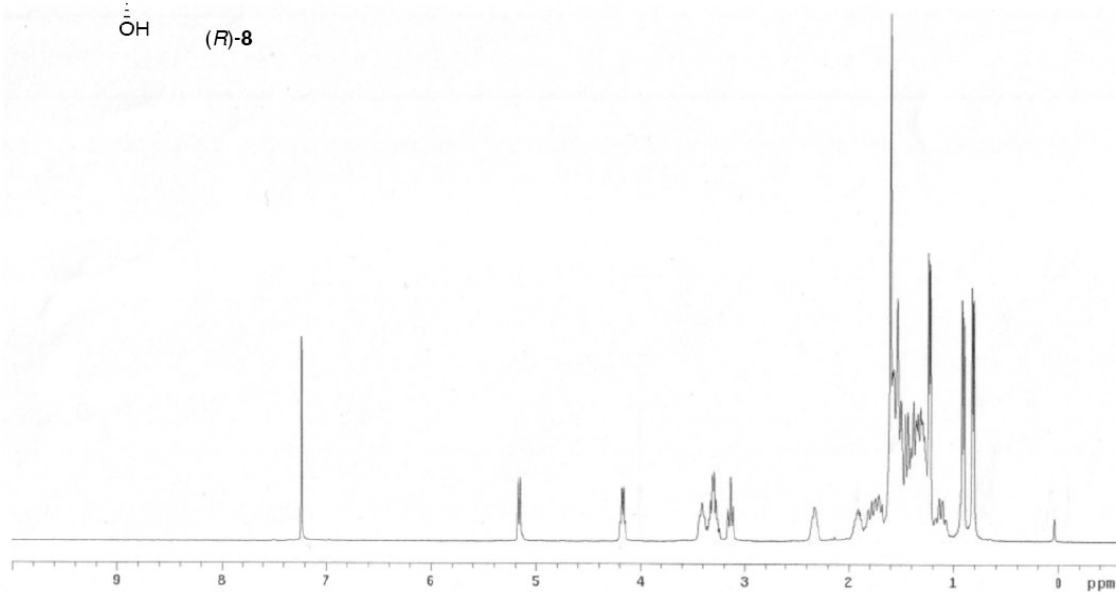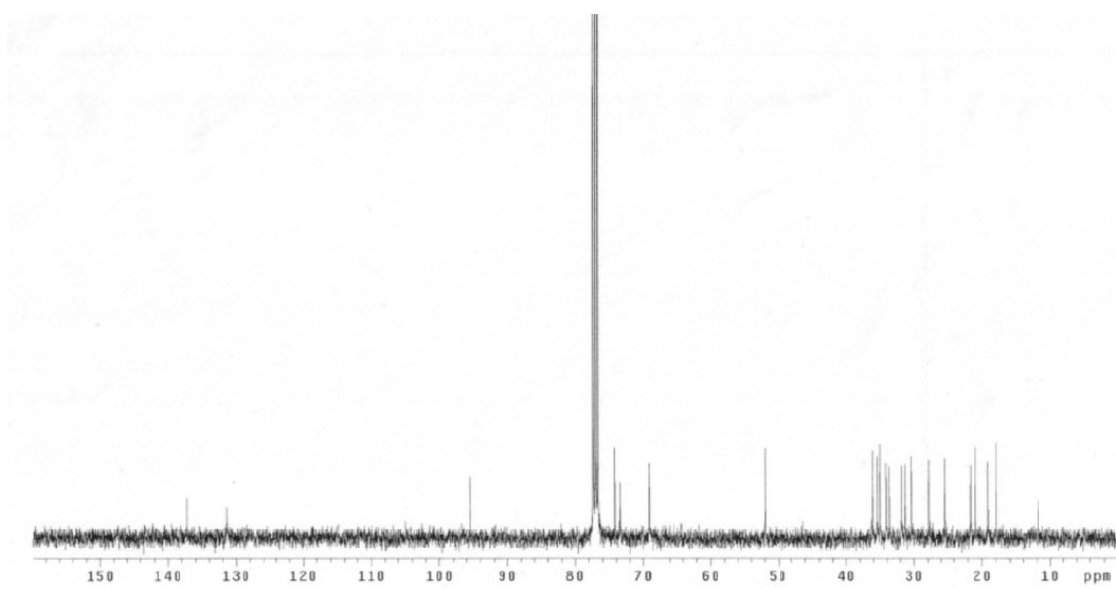



Synthesis of a 35-Member Stereoisomer Library of Bistramide A: Evaluation of Effects on Actin State, Cell Cycle and Tumor Cell Growth

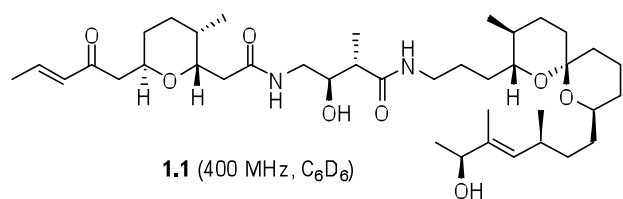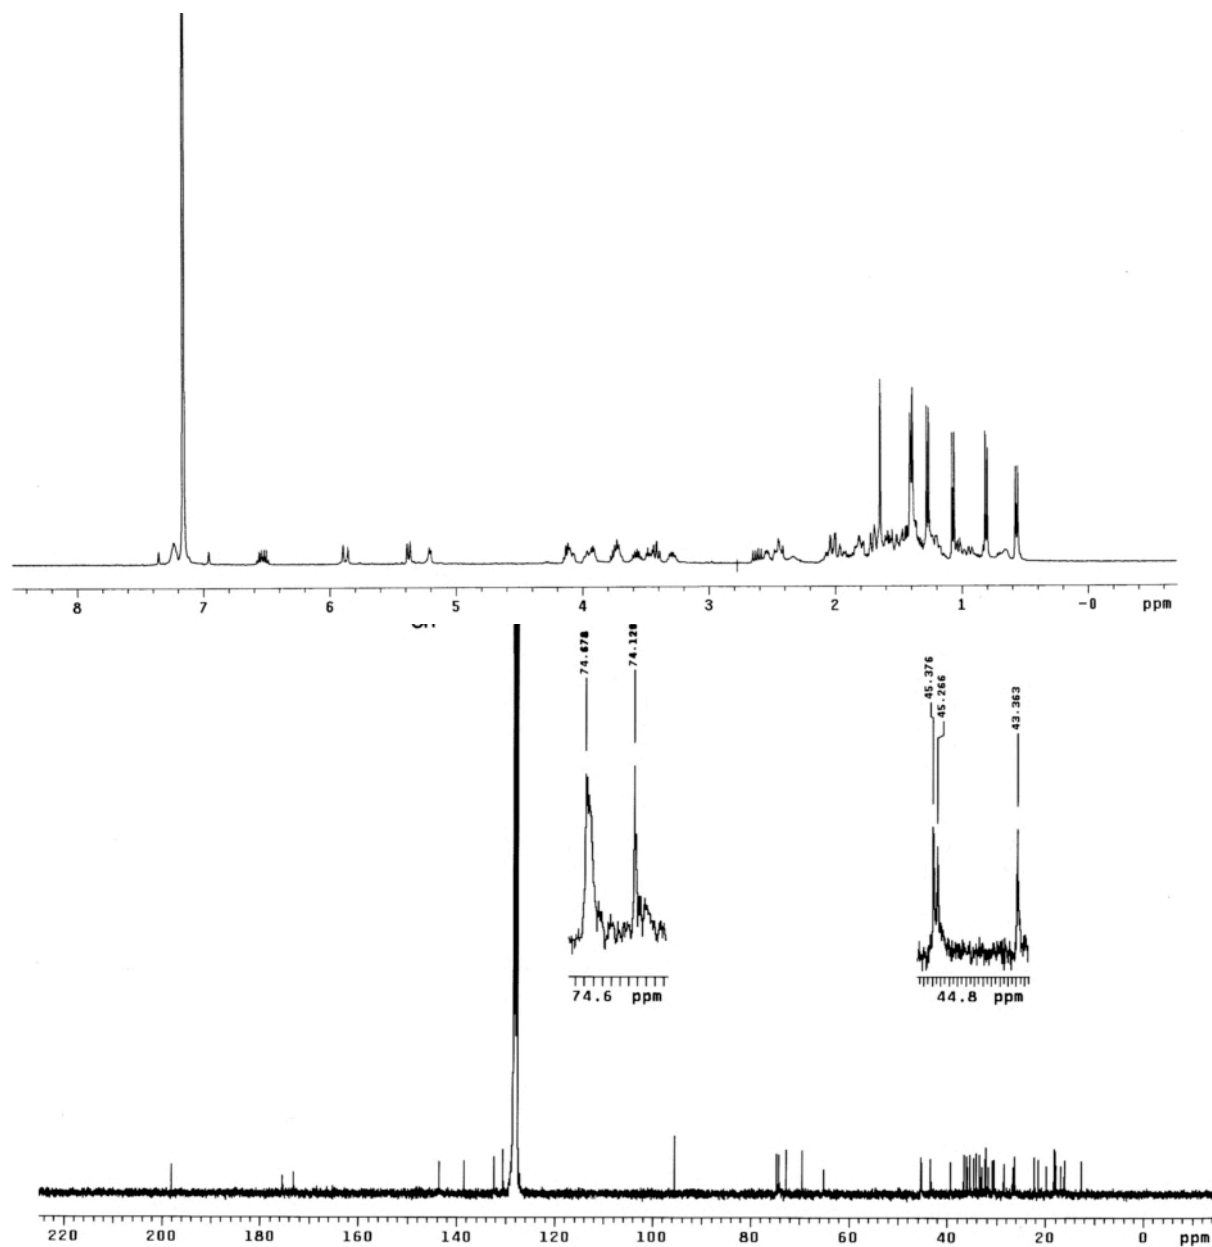

Synthesis of a 35-Member Stereoisomer Library of Bistramide A: Evaluation of Effects on Actin State, Cell Cycle and Tumor Cell Growth

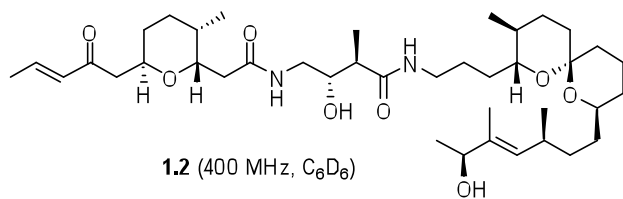

**1.2** (400 MHz, C<sub>6</sub>D<sub>6</sub>)

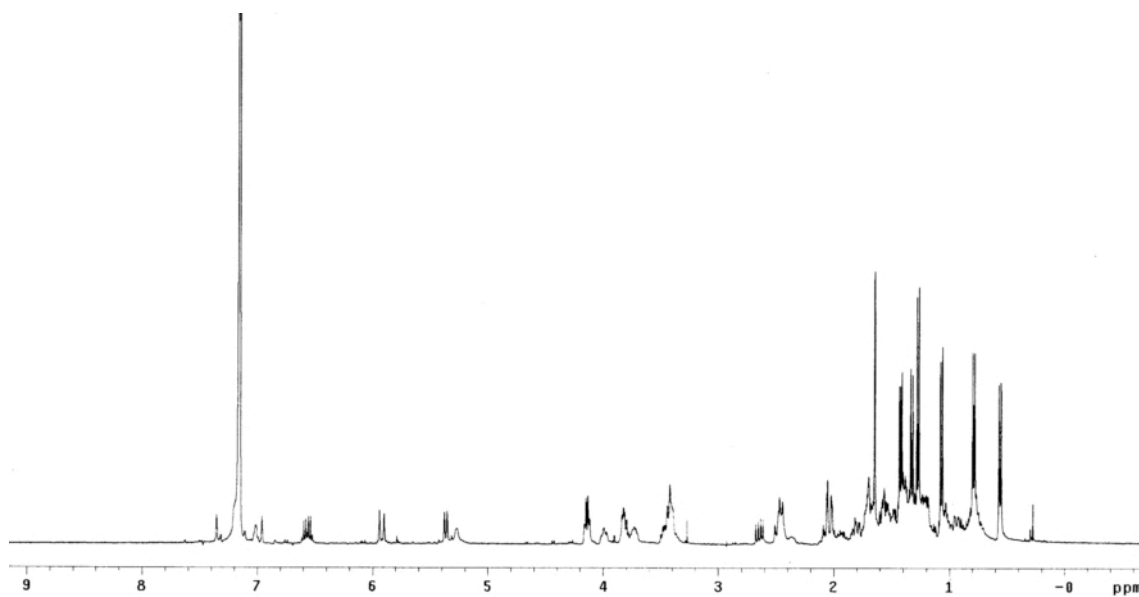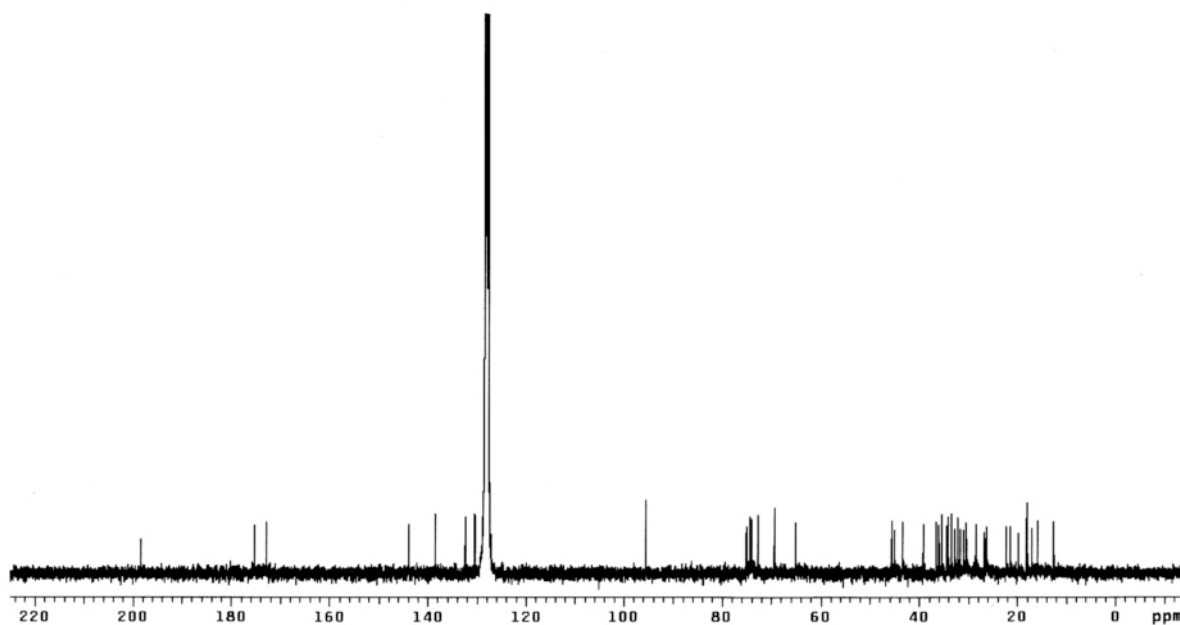

Synthesis of a 35-Member Stereoisomer Library of Bistramide A: Evaluation of Effects on Actin State, Cell Cycle and Tumor Cell Growth

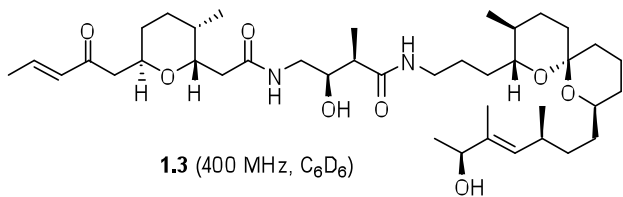

1.3 (400 MHz, C<sub>6</sub>D<sub>6</sub>)

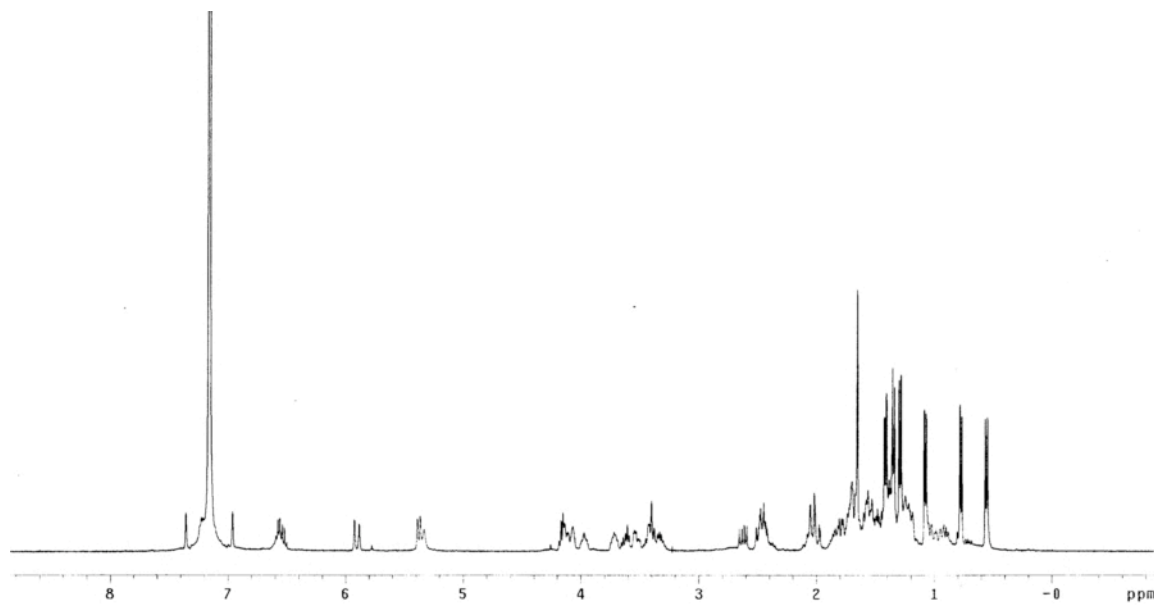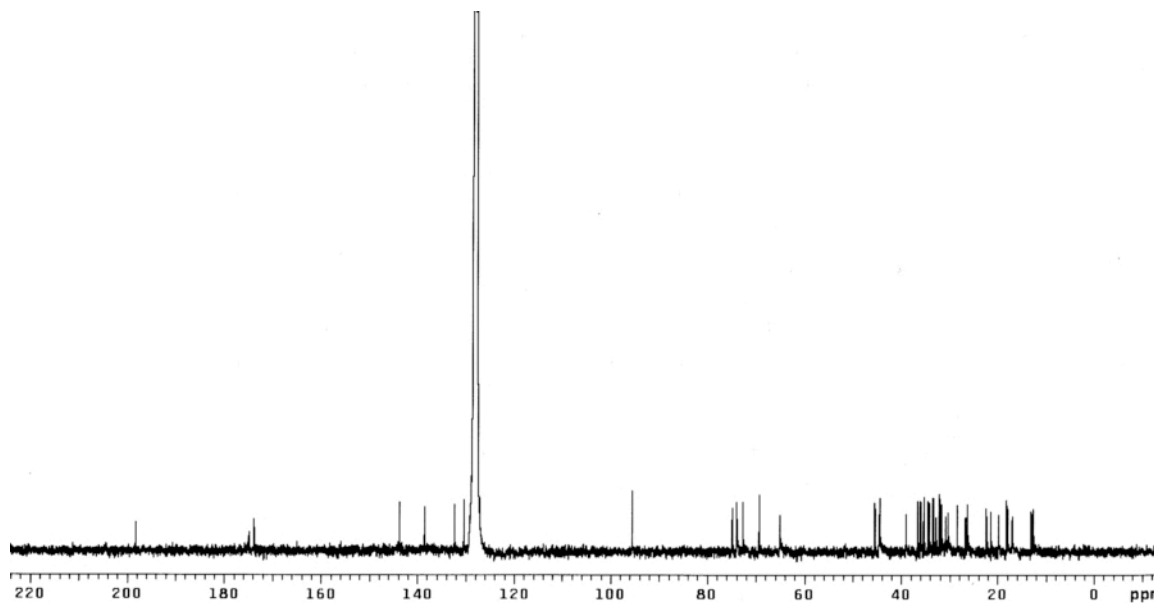

Synthesis of a 35-Member Stereoisomer Library of Bistramide A: Evaluation of Effects on Actin State, Cell Cycle and Tumor Cell Growth

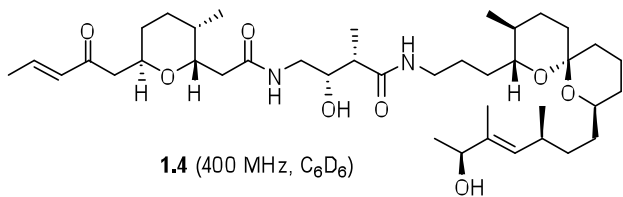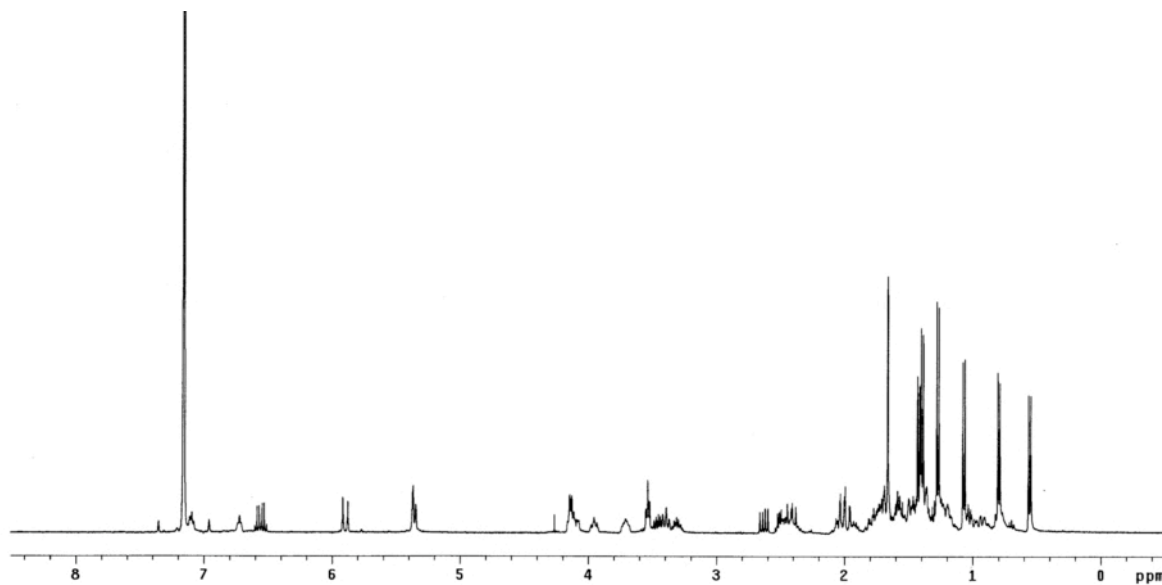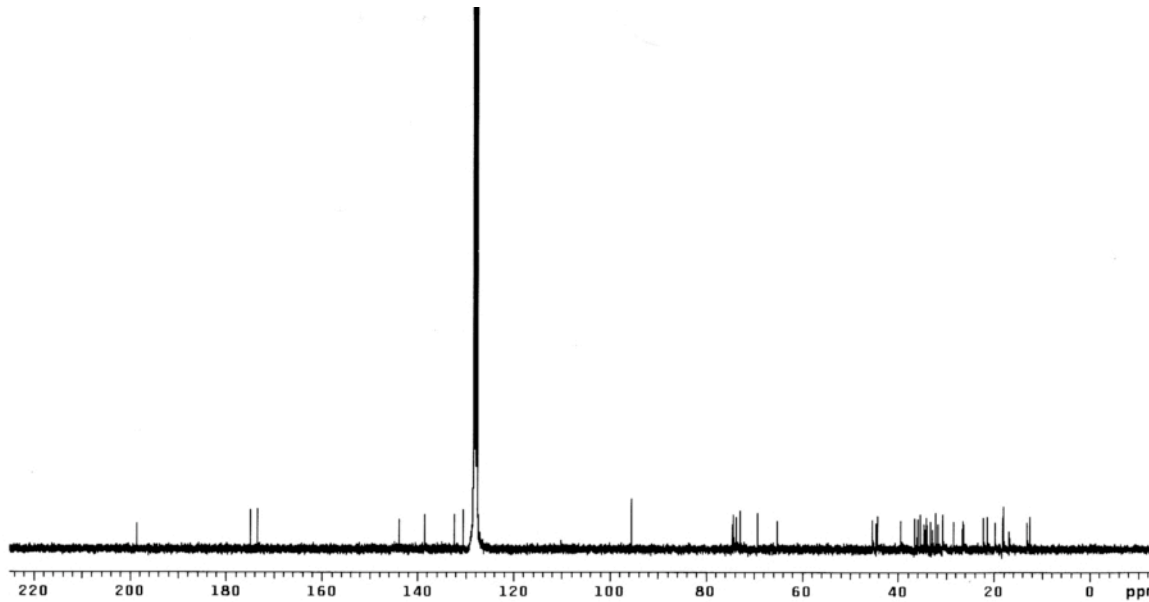

Synthesis of a 35-Member Stereoisomer Library of Bistramide A: Evaluation of Effects on Actin State, Cell Cycle and Tumor Cell Growth

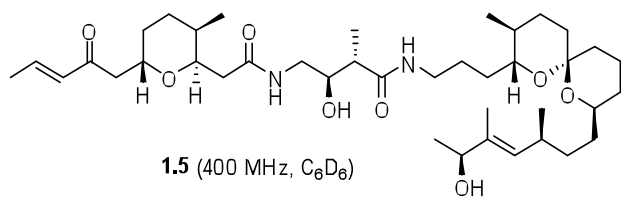

1.5 (400 MHz, C<sub>6</sub>D<sub>6</sub>)

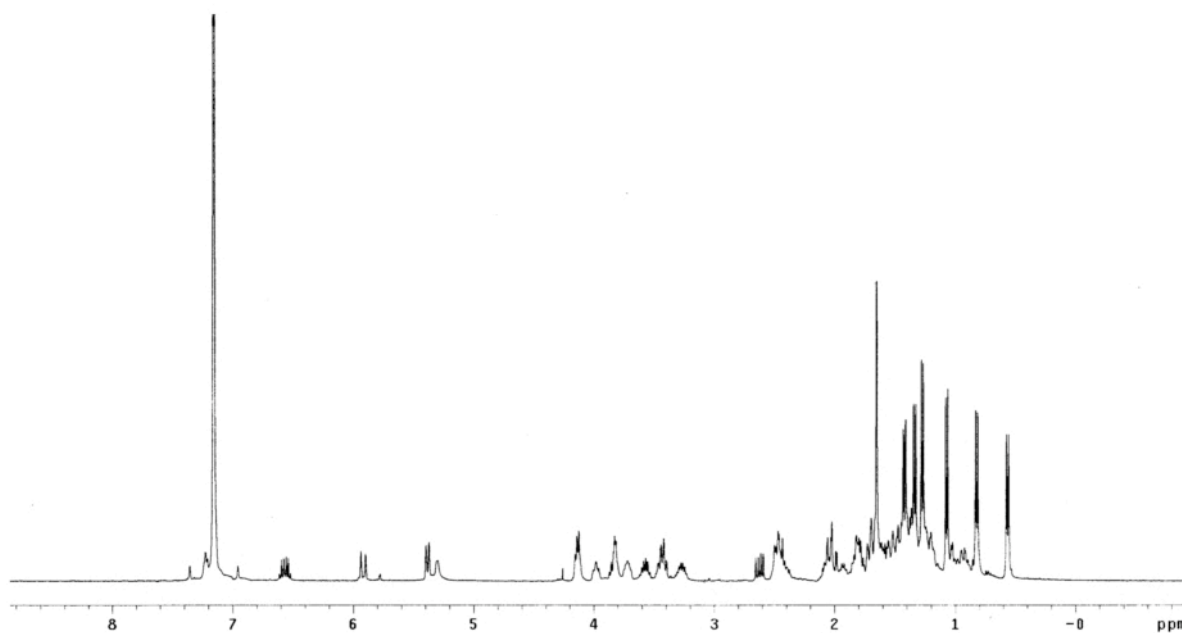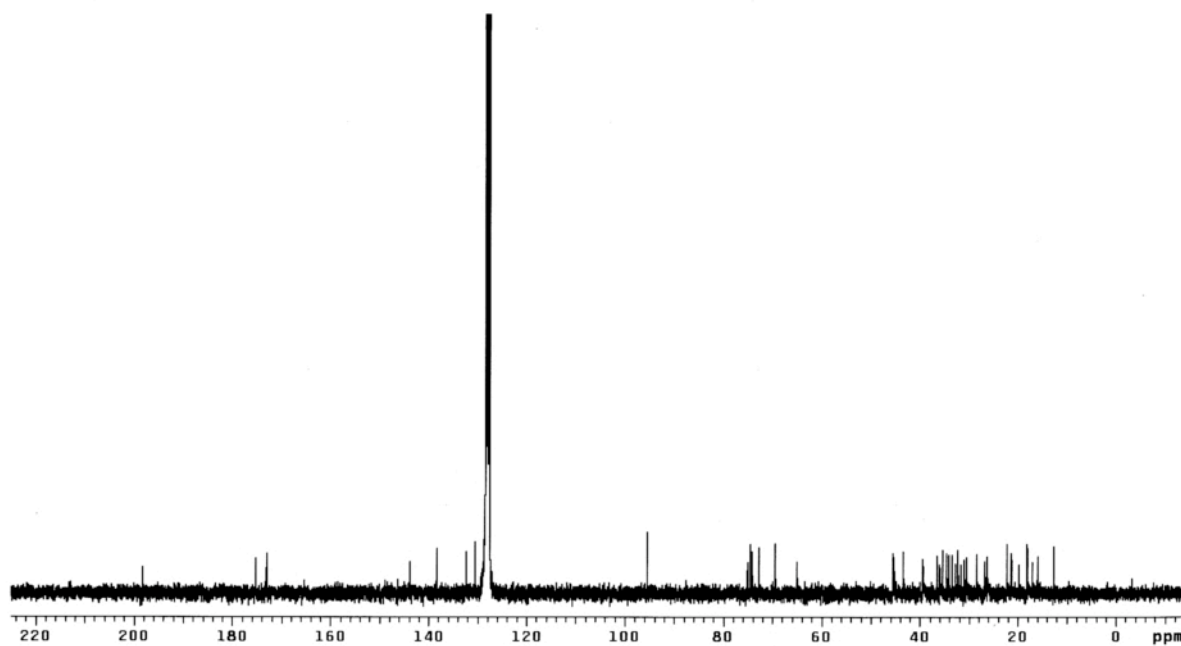

Synthesis of a 35-Member Stereoisomer Library of Bistramide A: Evaluation of Effects on Actin State, Cell Cycle and Tumor Cell Growth

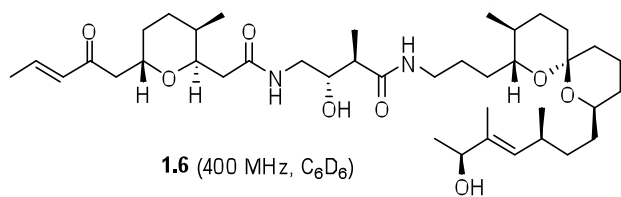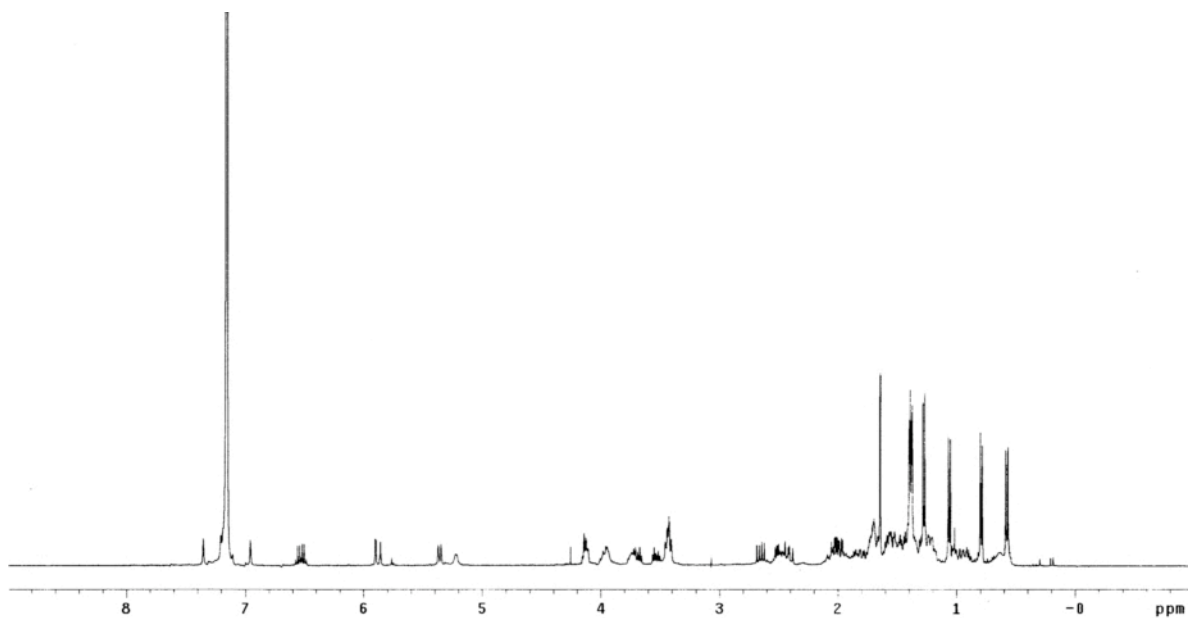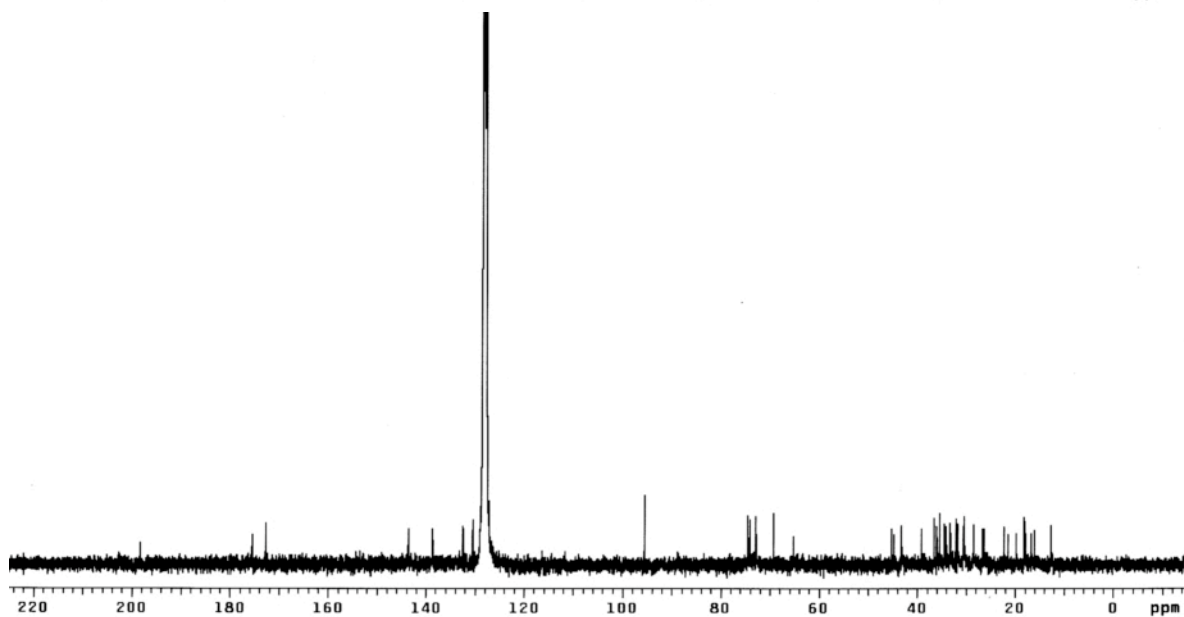

Synthesis of a 35-Member Stereoisomer Library of Bistramide A: Evaluation of Effects on Actin State, Cell Cycle and Tumor Cell Growth

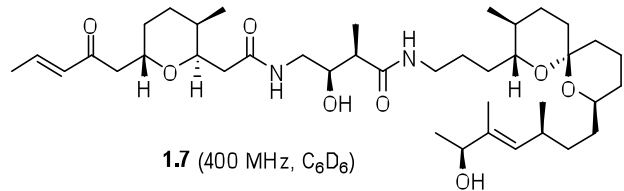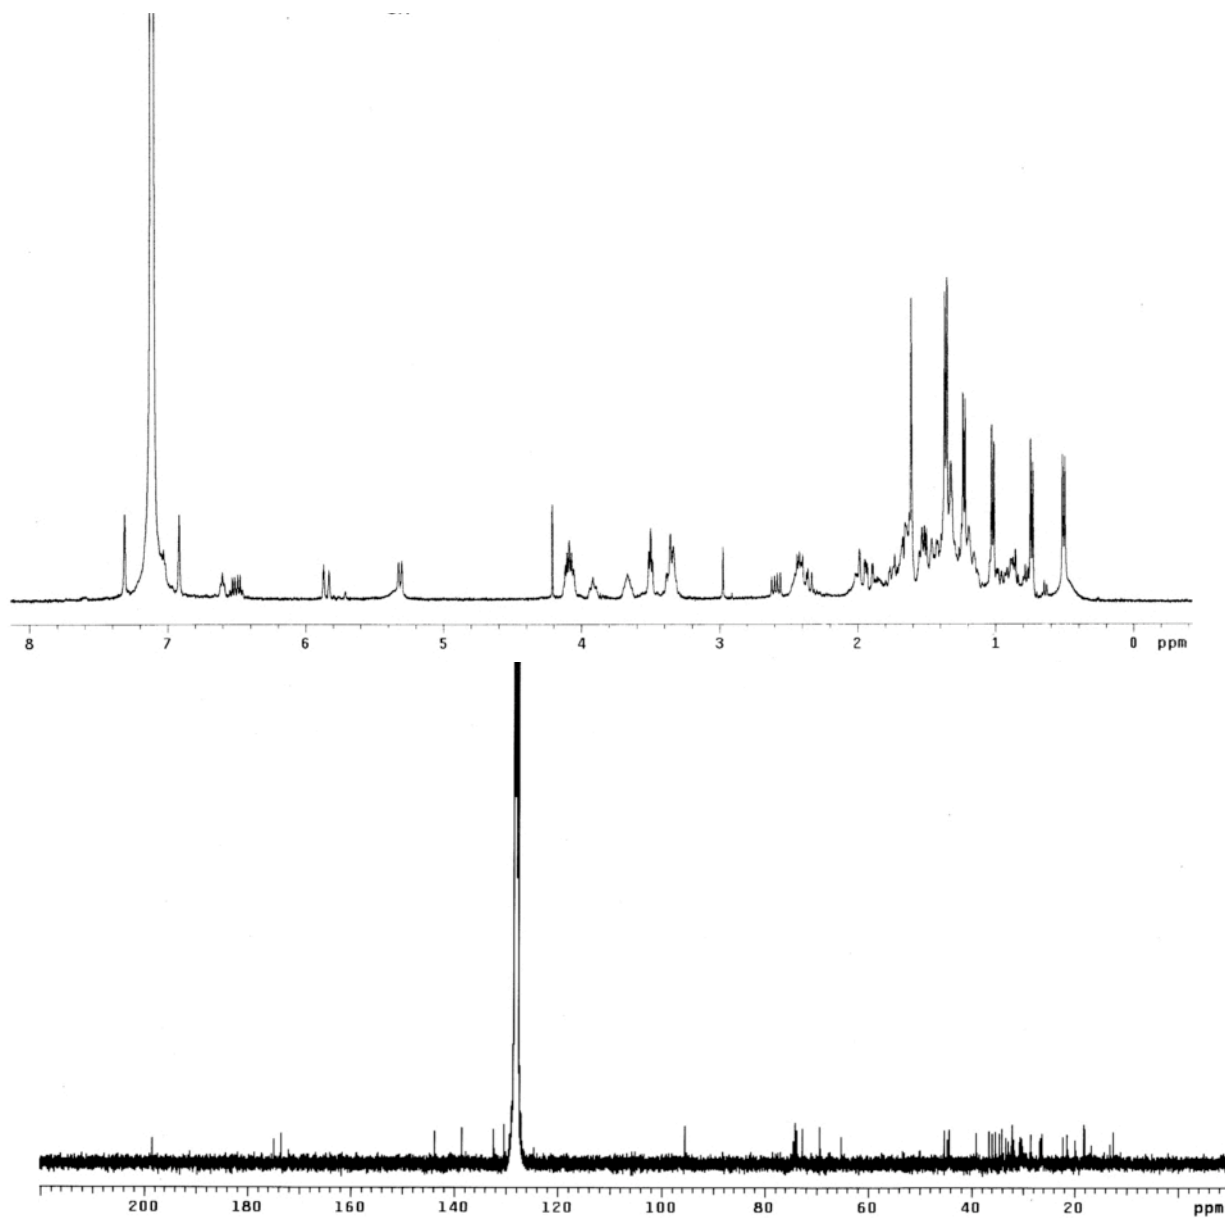

Synthesis of a 35-Member Stereoisomer Library of Bistramide A: Evaluation of Effects on Actin State, Cell Cycle and Tumor Cell Growth

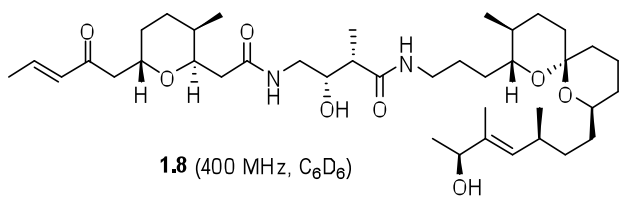

1.8 (400 MHz, C<sub>6</sub>D<sub>6</sub>)

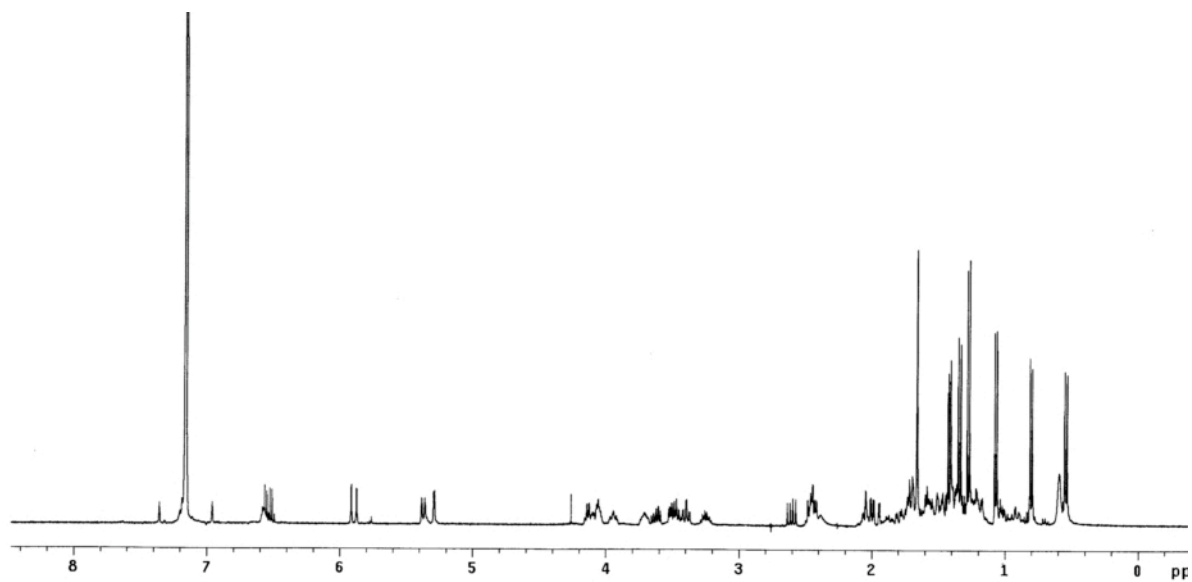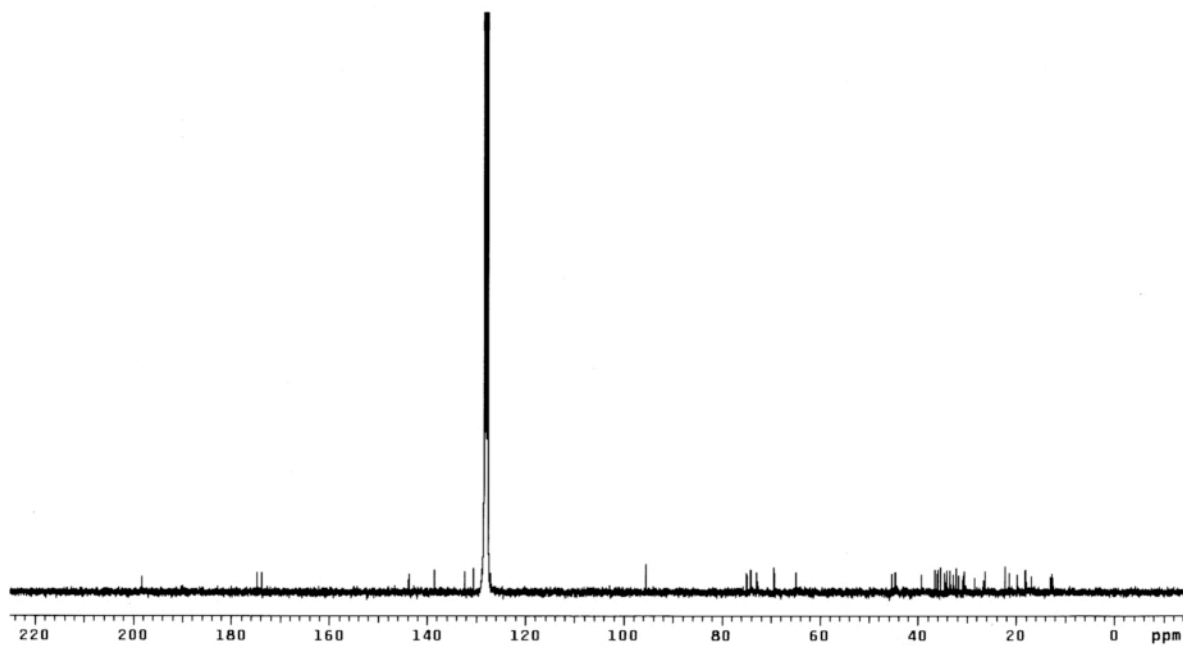



Synthesis of a 35-Member Stereoisomer Library of Bistramide A: Evaluation of Effects on Actin State, Cell Cycle and Tumor Cell Growth

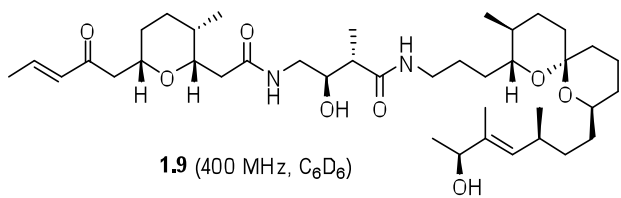

1.9 (400 MHz, C<sub>6</sub>D<sub>6</sub>)

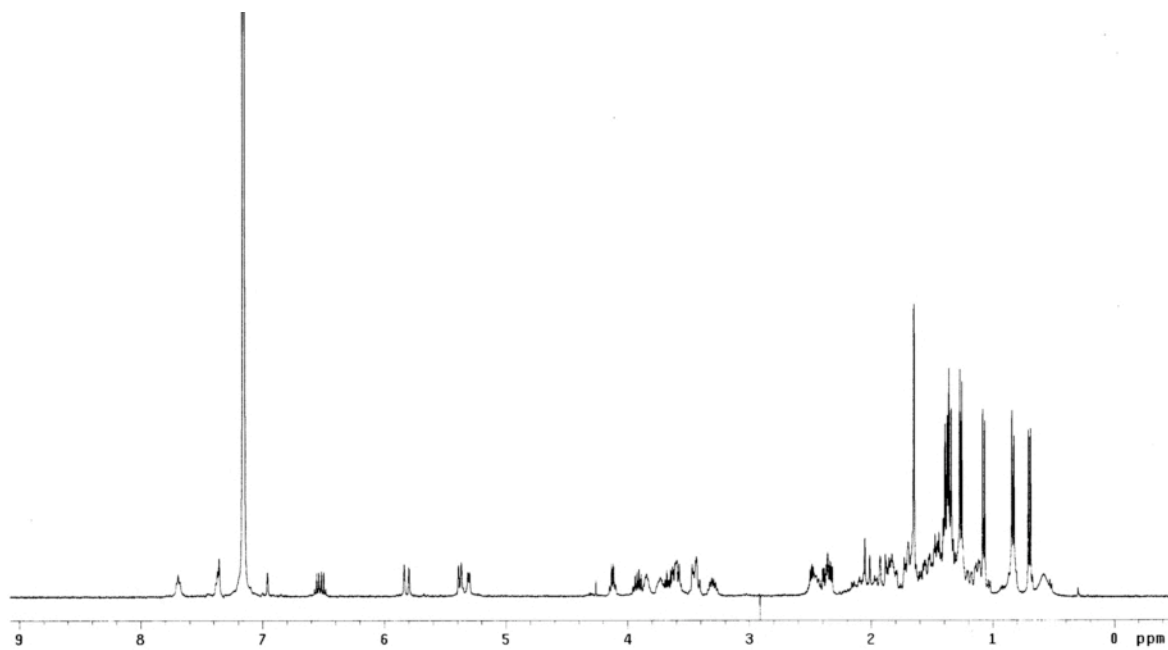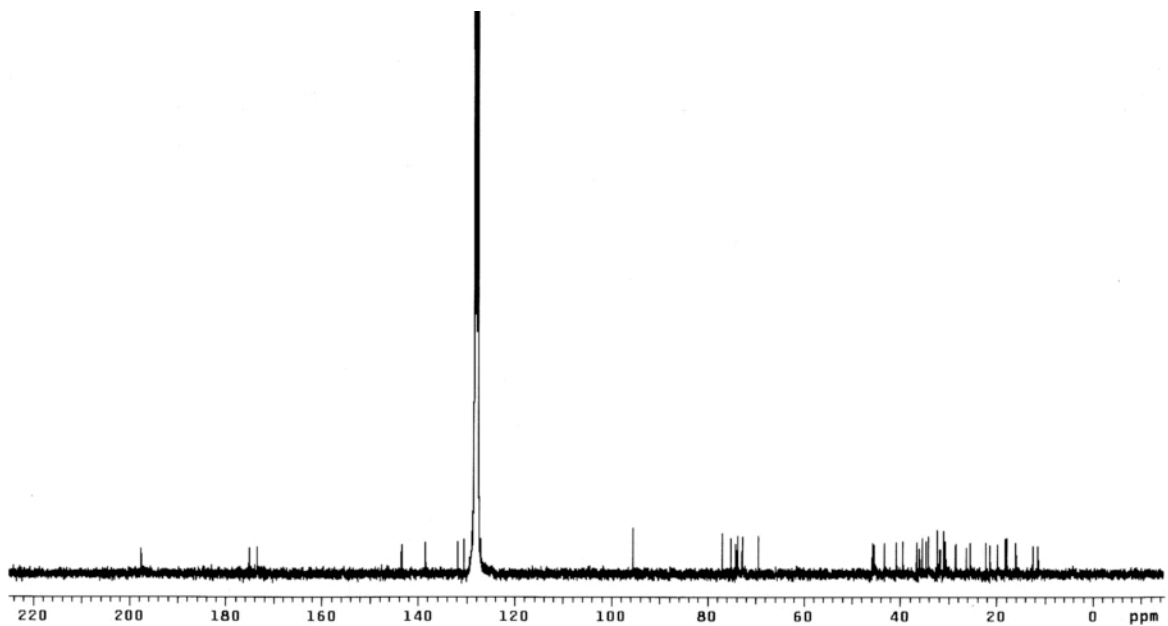

Synthesis of a 35-Member Stereoisomer Library of Bistramide A: Evaluation of Effects on Actin State, Cell Cycle and Tumor Cell Growth

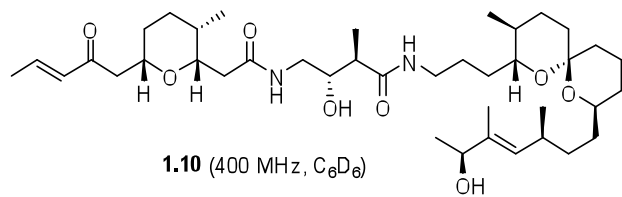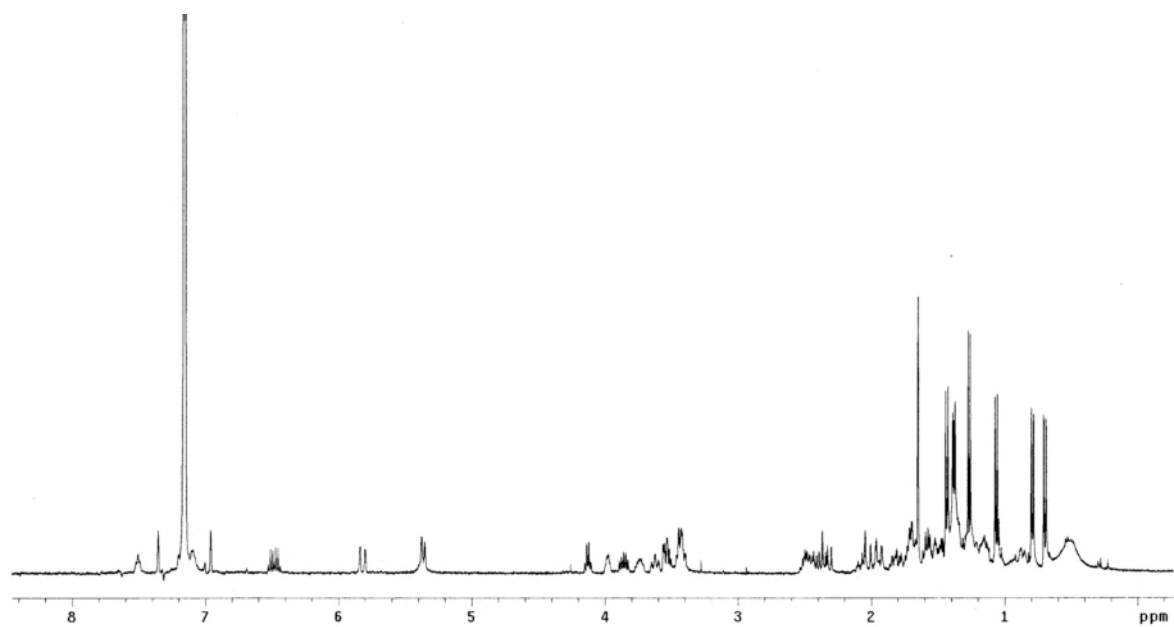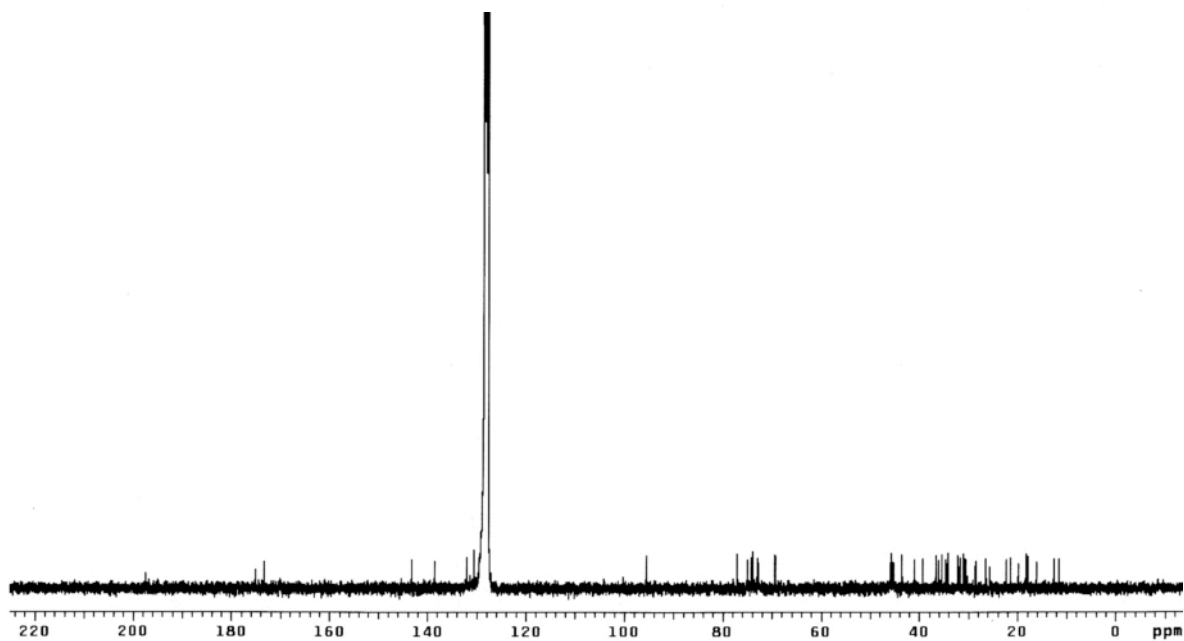

Synthesis of a 35-Member Stereoisomer Library of Bistramide A: Evaluation of Effects on Actin State, Cell Cycle and Tumor Cell Growth

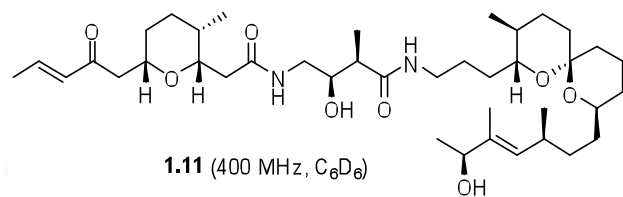

1.11 (400 MHz,  $C_6D_6$ )

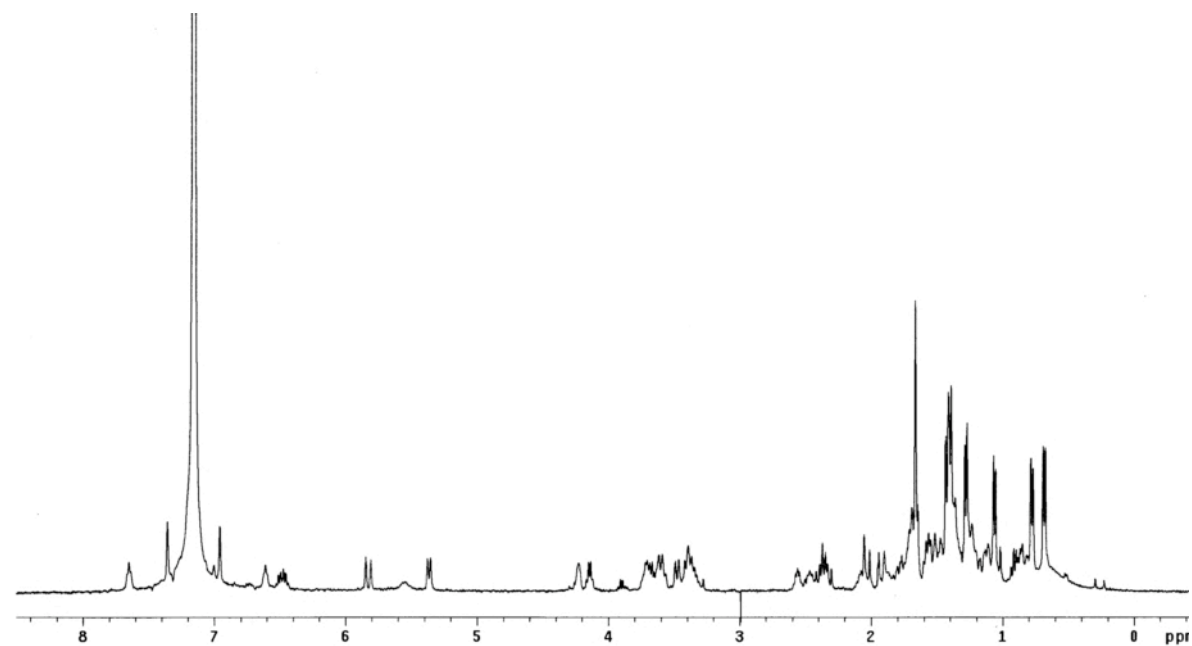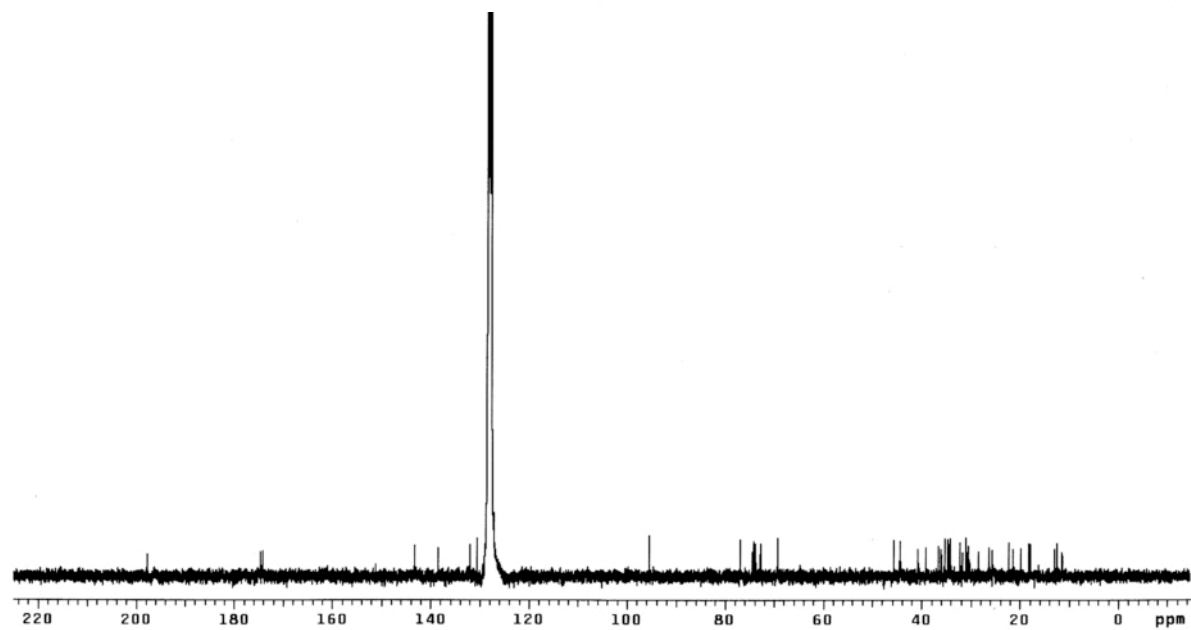

Synthesis of a 35-Member Stereoisomer Library of Bistramide A: Evaluation of Effects on Actin State, Cell Cycle and Tumor Cell Growth

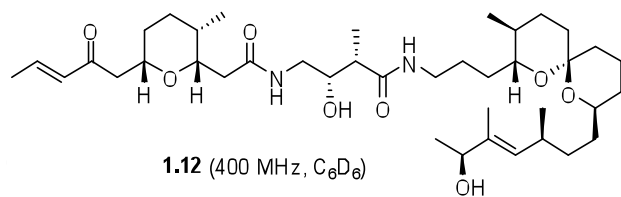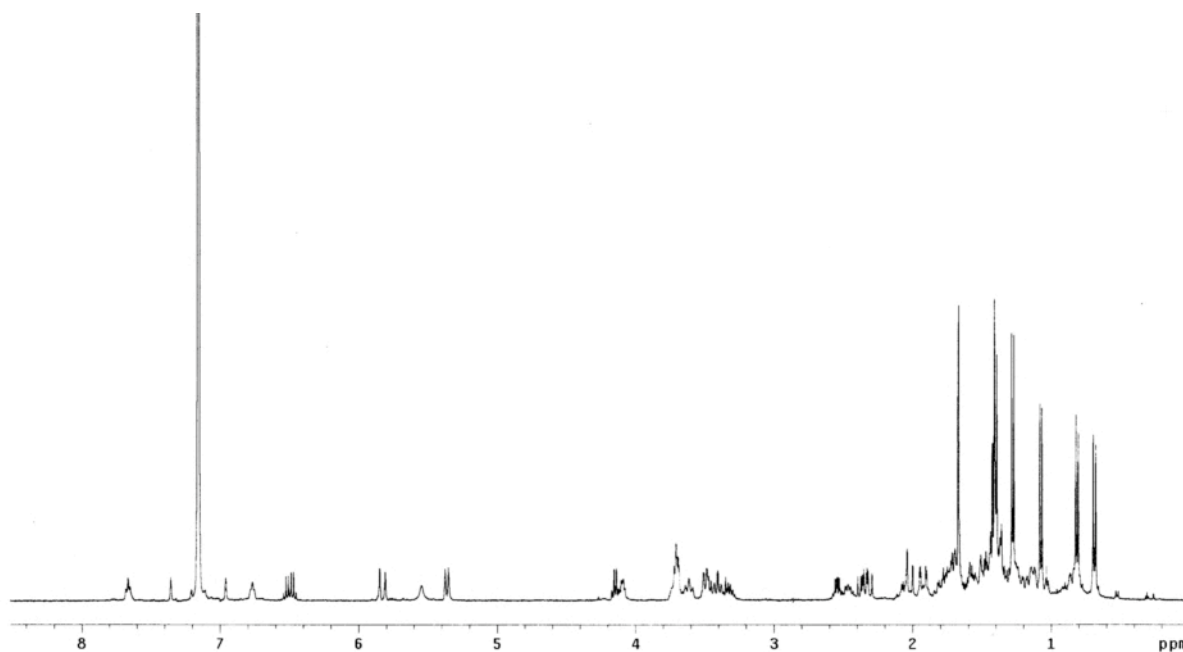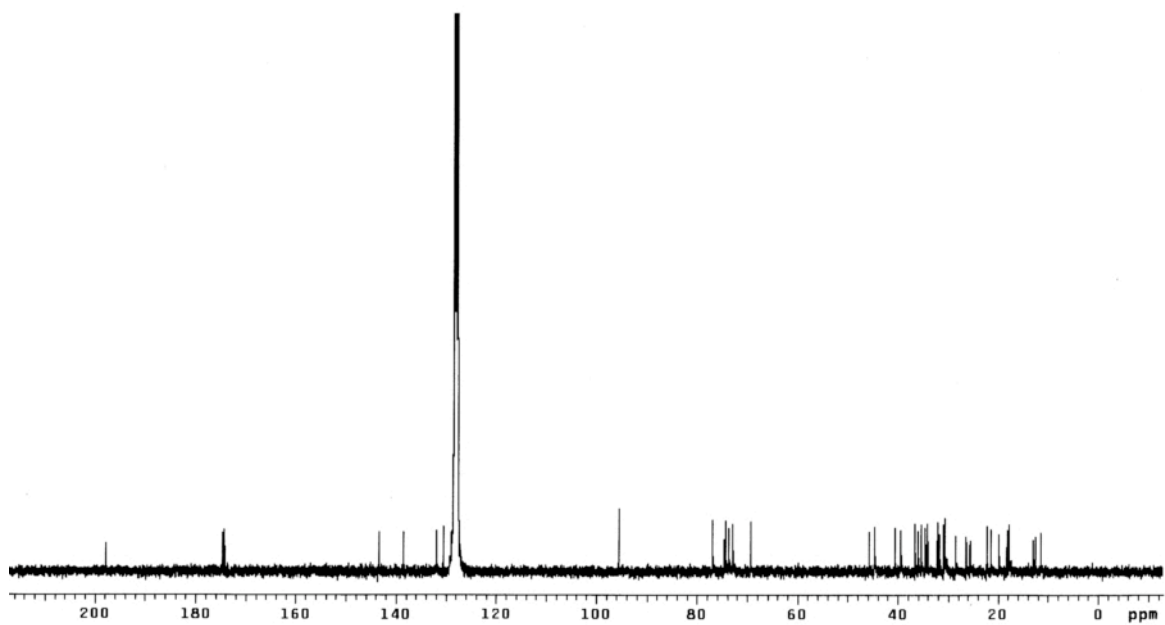

Synthesis of a 35-Member Stereoisomer Library of Bistramide A: Evaluation of Effects on Actin State, Cell Cycle and Tumor Cell Growth

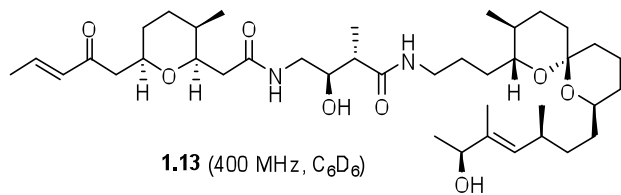

1.13 (400 MHz, C<sub>6</sub>D<sub>6</sub>)

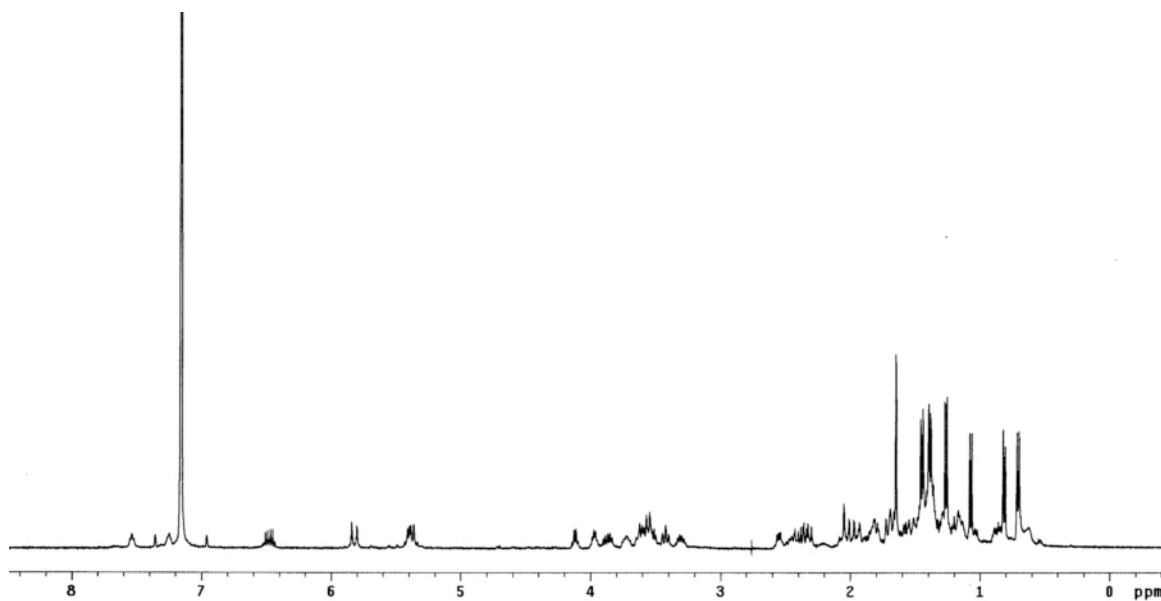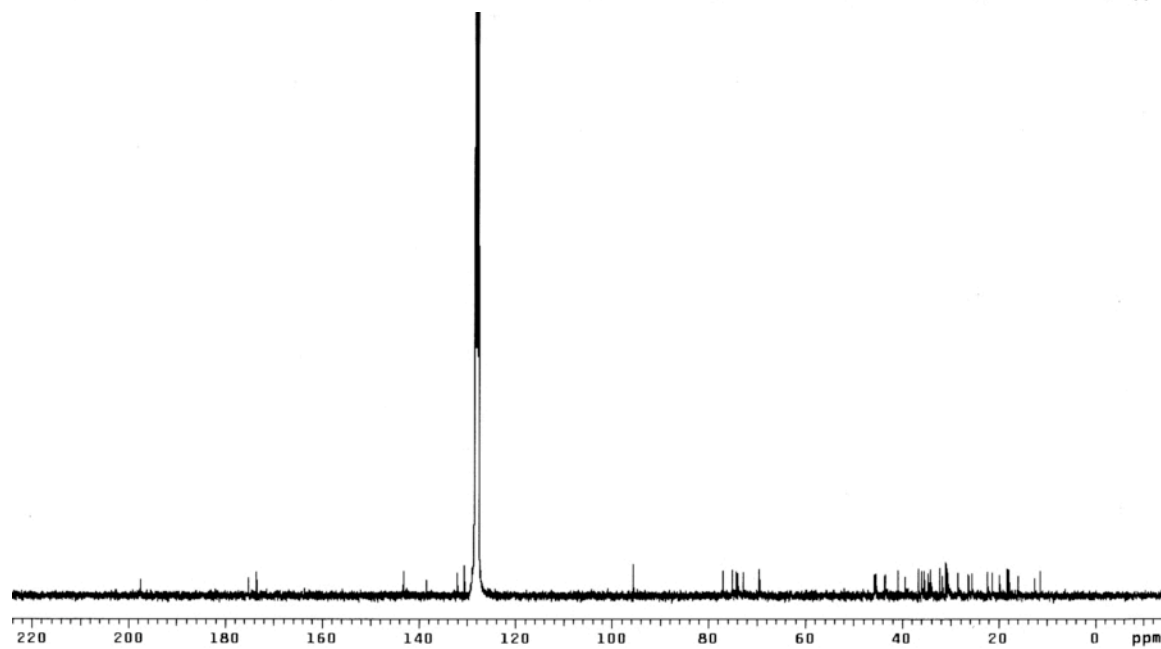

Synthesis of a 35-Member Stereoisomer Library of Bistramide A: Evaluation of Effects on Actin State, Cell Cycle and Tumor Cell Growth

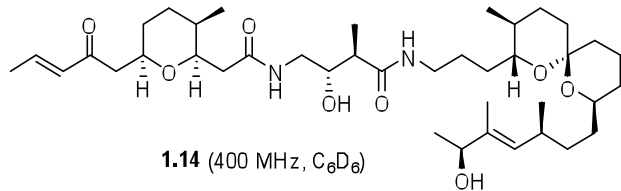

1.14 (400 MHz, C<sub>6</sub>D<sub>6</sub>)

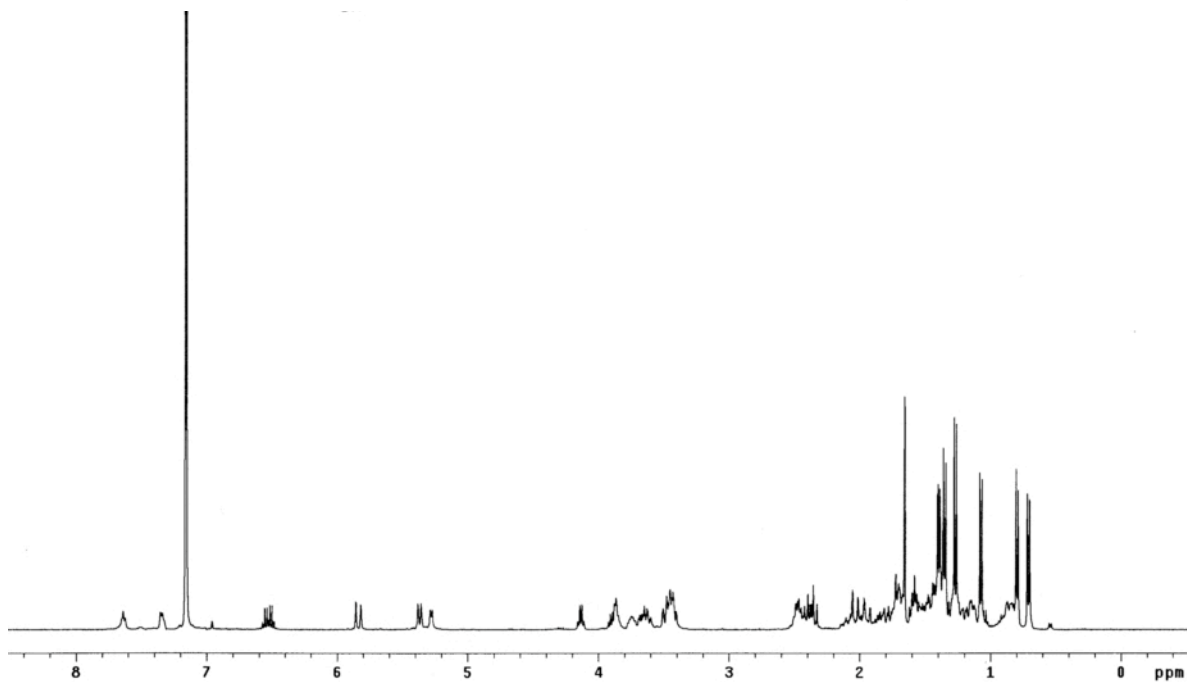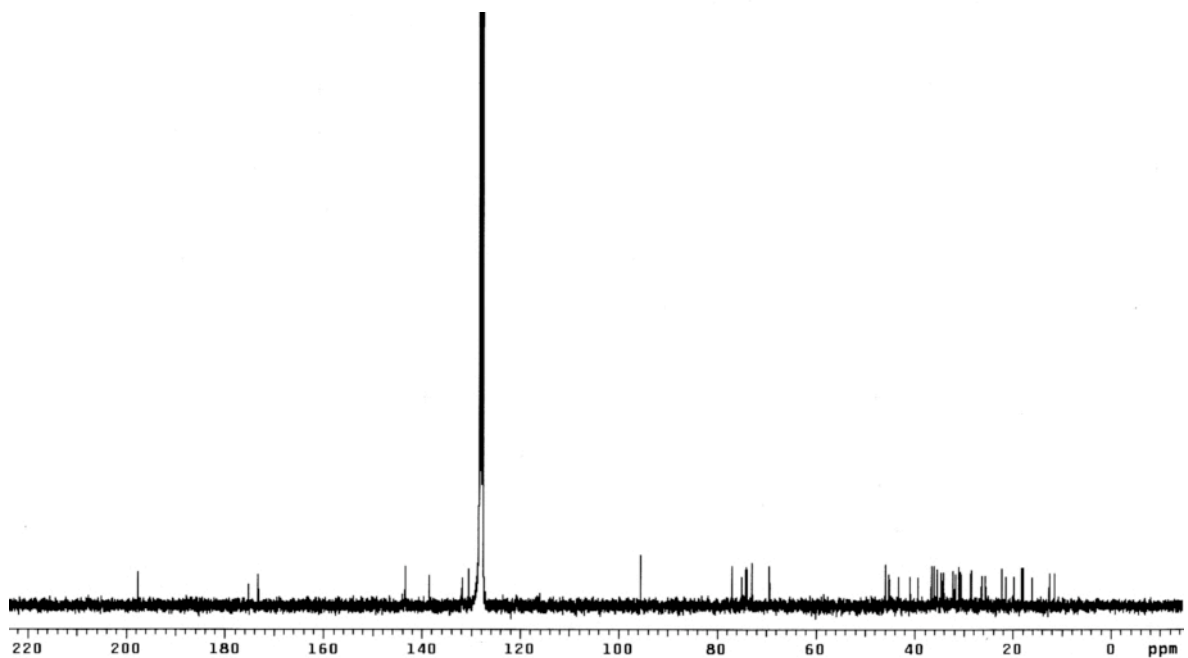

Synthesis of a 35-Member Stereoisomer Library of Bistramide A: Evaluation of Effects on Actin State, Cell Cycle and Tumor Cell Growth

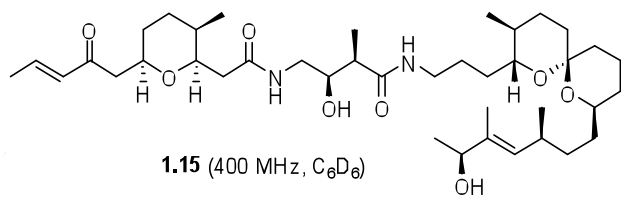

1.15 (400 MHz, C<sub>6</sub>D<sub>6</sub>)

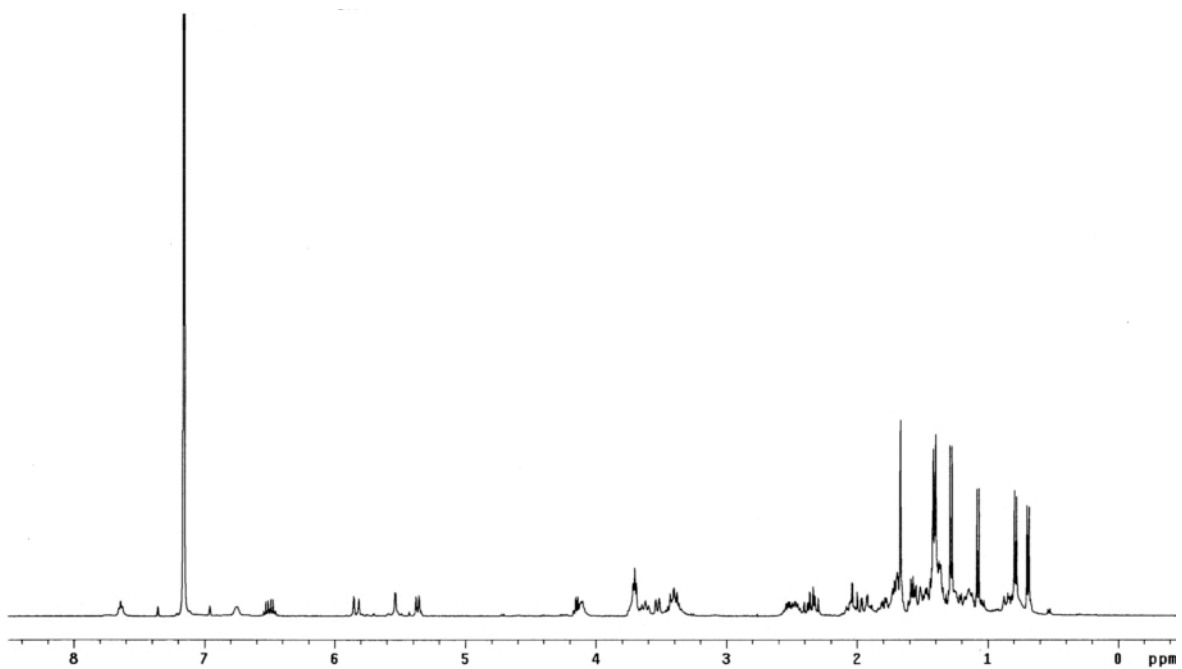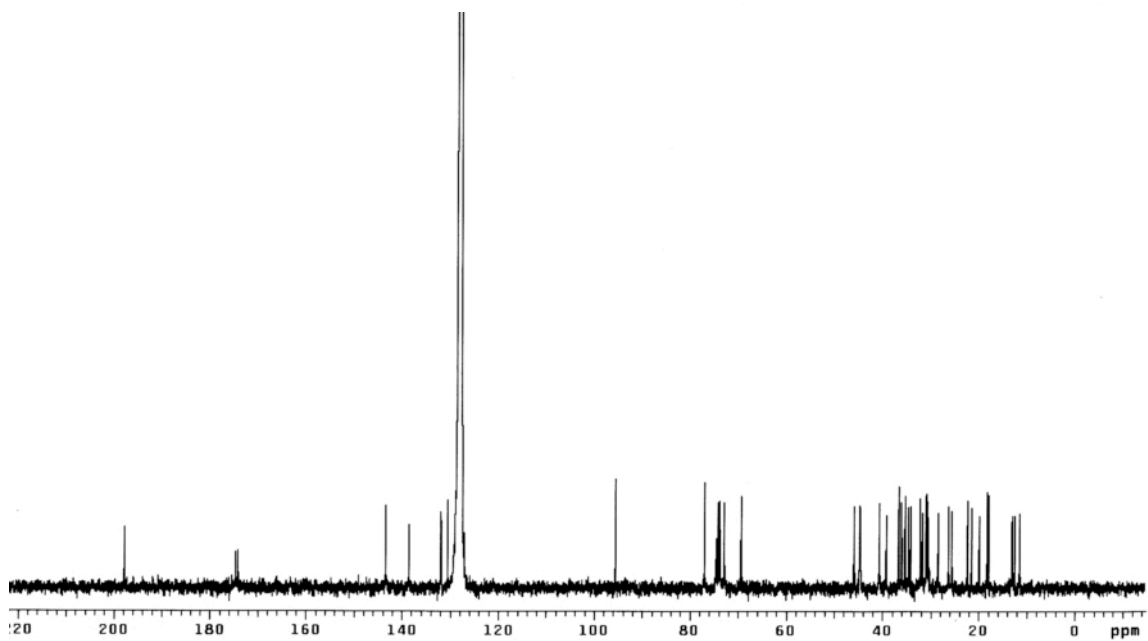

Synthesis of a 35-Member Stereoisomer Library of Bistramide A: Evaluation of Effects on Actin State, Cell Cycle and Tumor Cell Growth

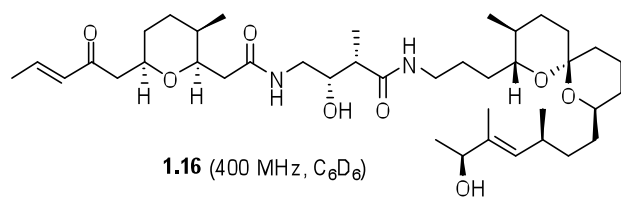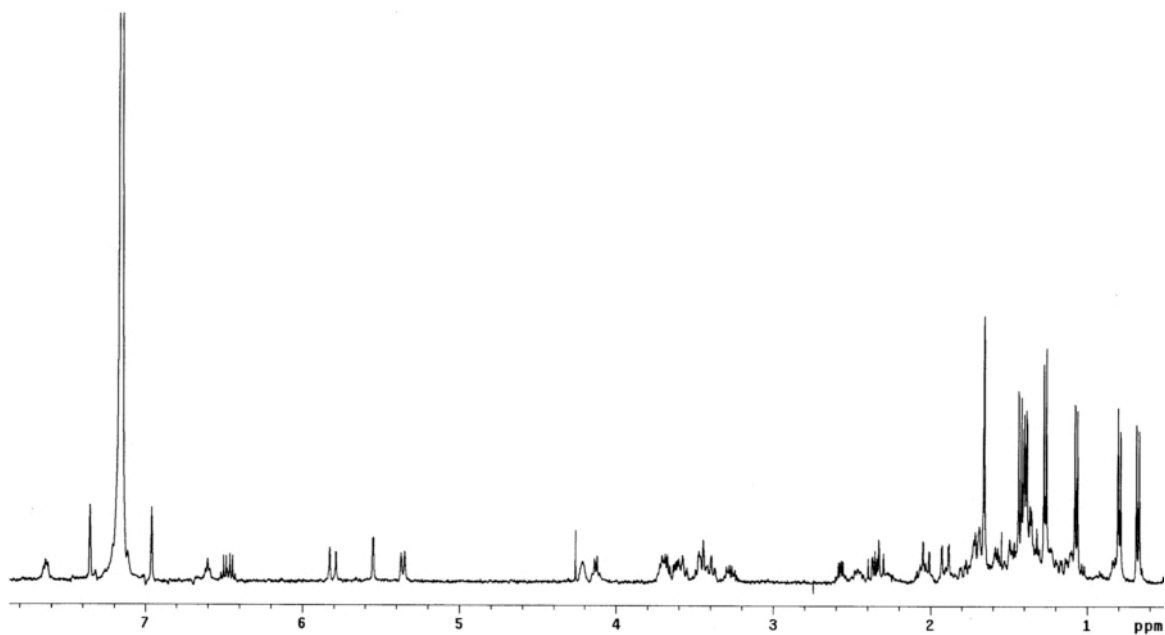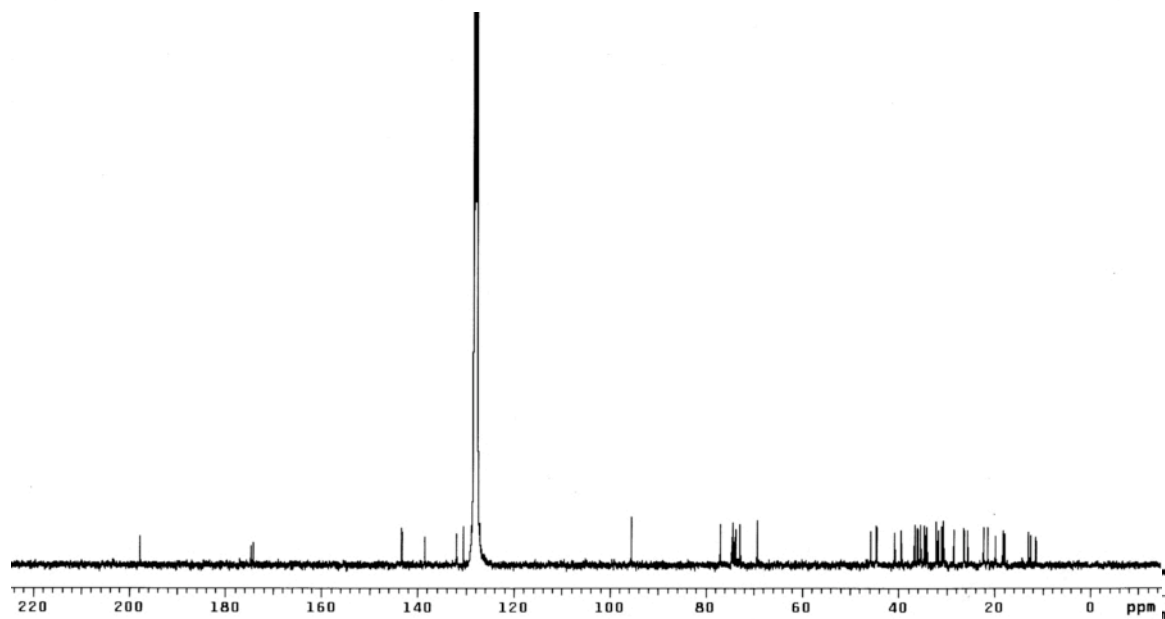



Synthesis of a 35-Member Stereoisomer Library of Bistramide A: Evaluation of Effects on Actin State, Cell Cycle and Tumor Cell Growth

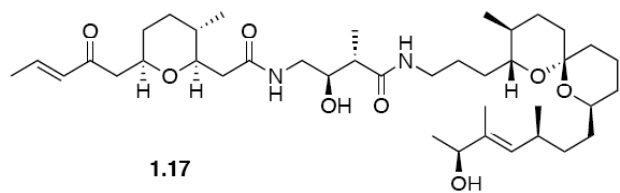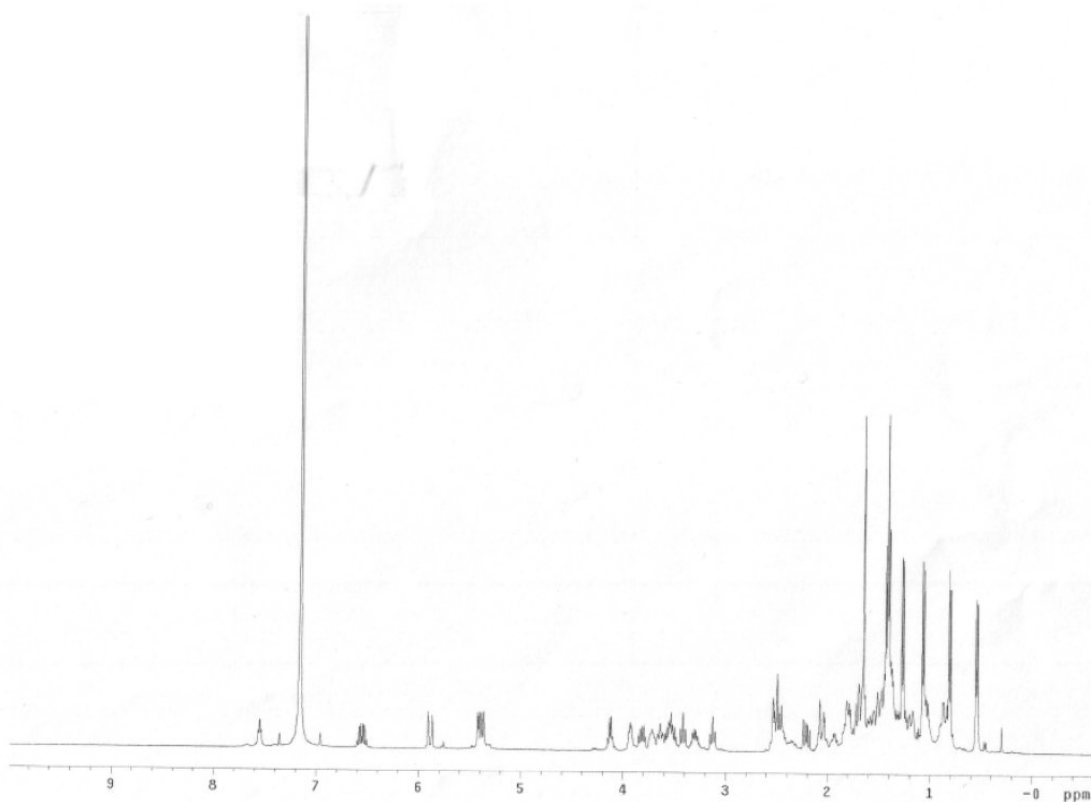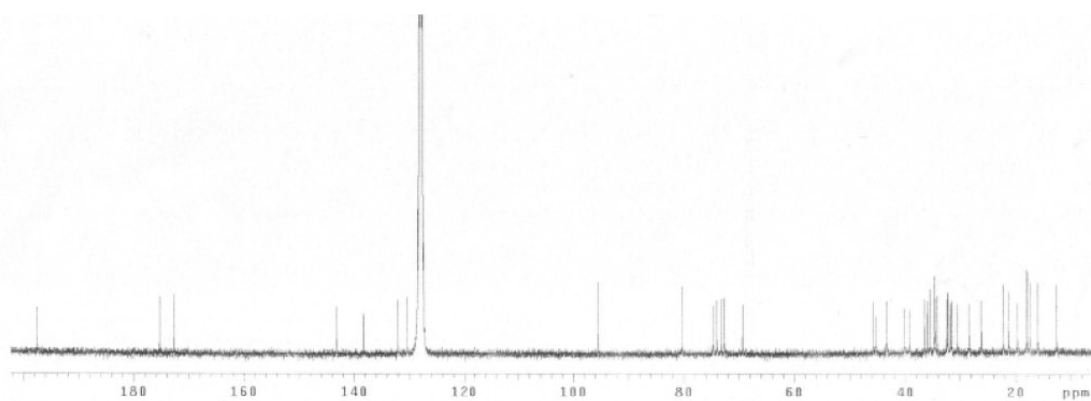

Synthesis of a 35-Member Stereoisomer Library of Bistramide A: Evaluation of Effects on Actin State, Cell Cycle and Tumor Cell Growth

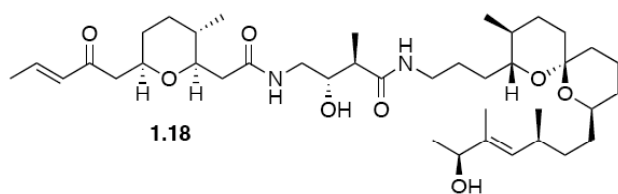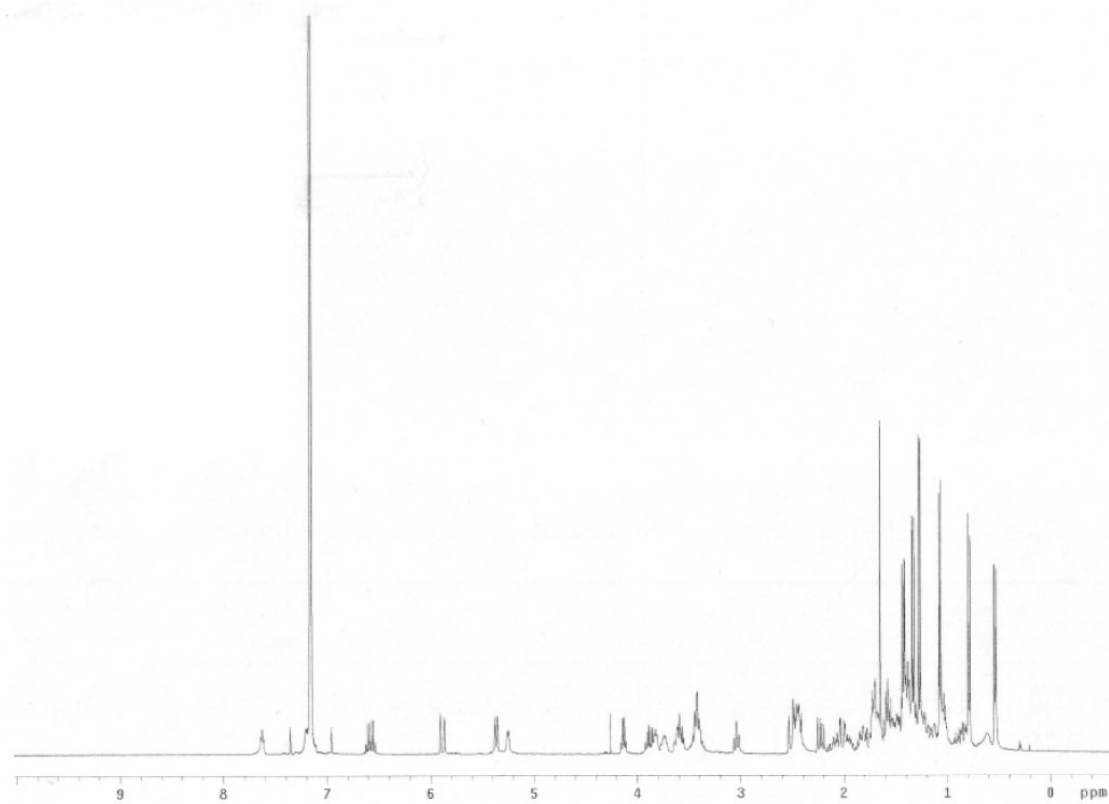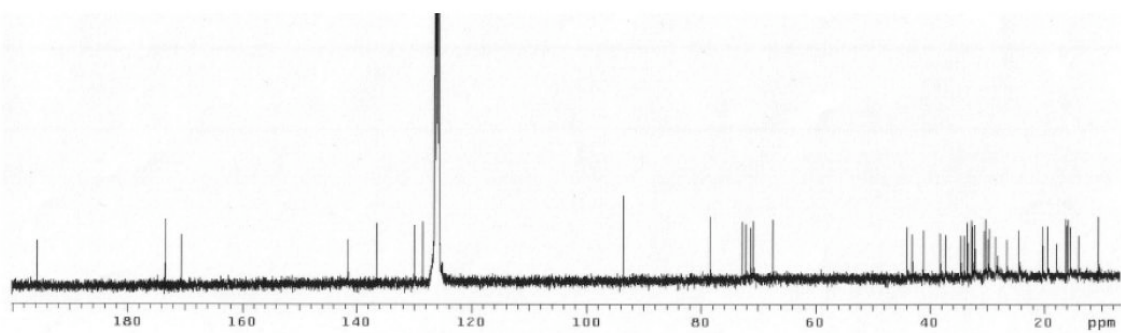

Synthesis of a 35-Member Stereoisomer Library of Bistramide A: Evaluation of Effects on Actin State, Cell Cycle and Tumor Cell Growth

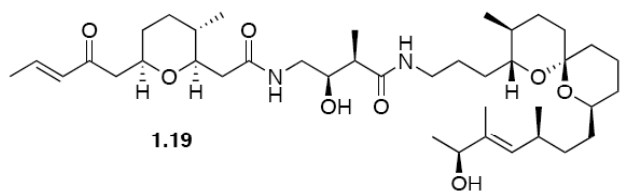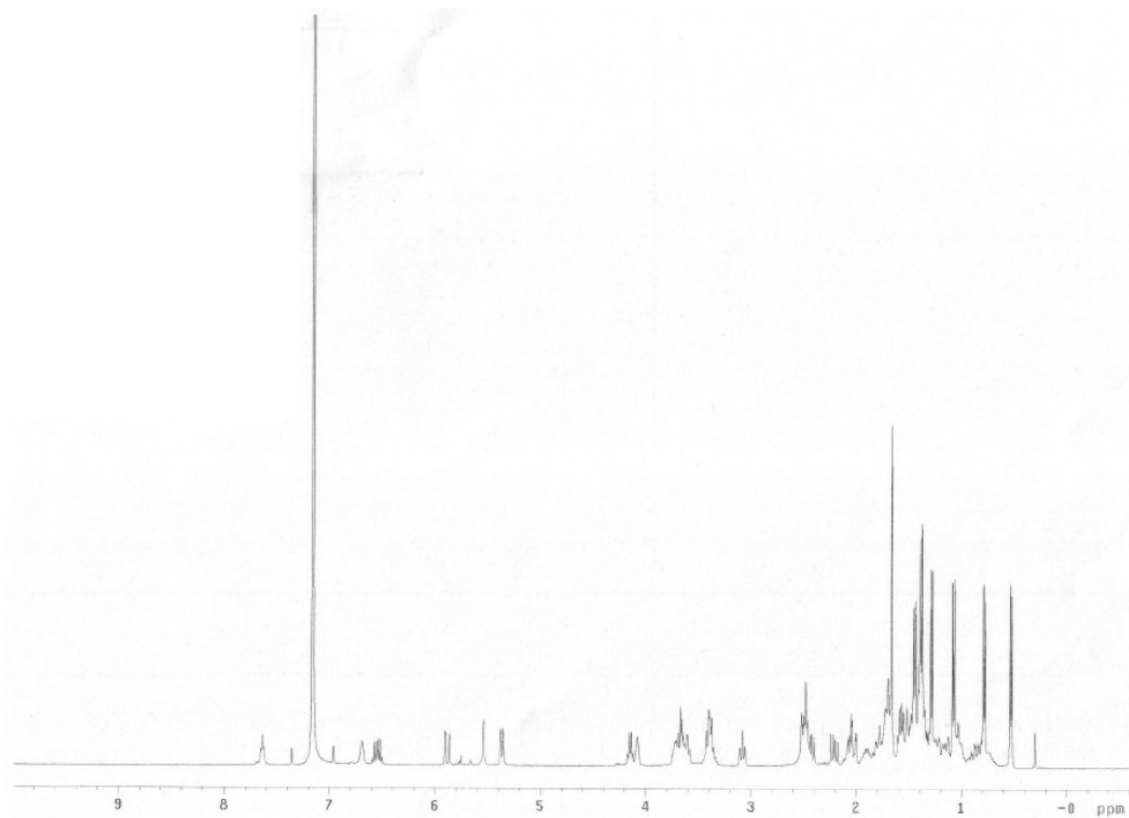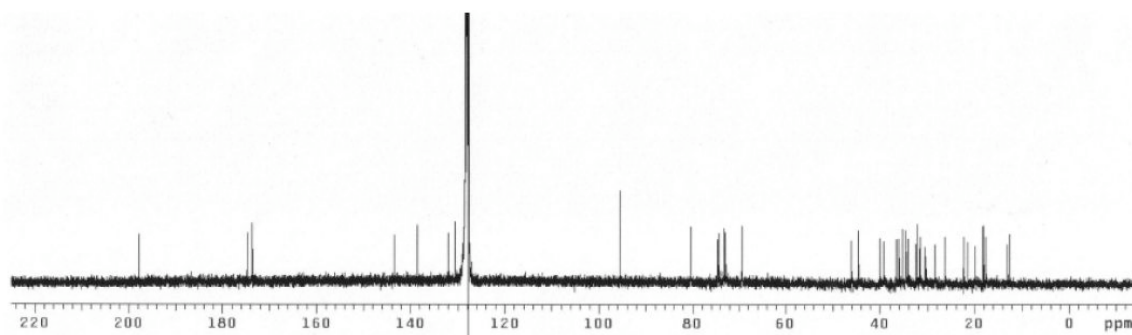

Synthesis of a 35-Member Stereoisomer Library of Bistramide A: Evaluation of Effects on Actin State, Cell Cycle and Tumor Cell Growth

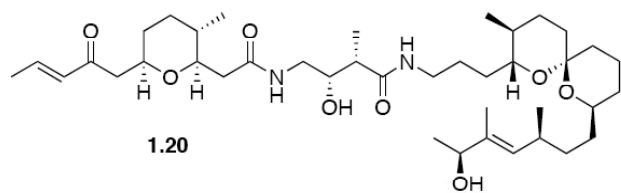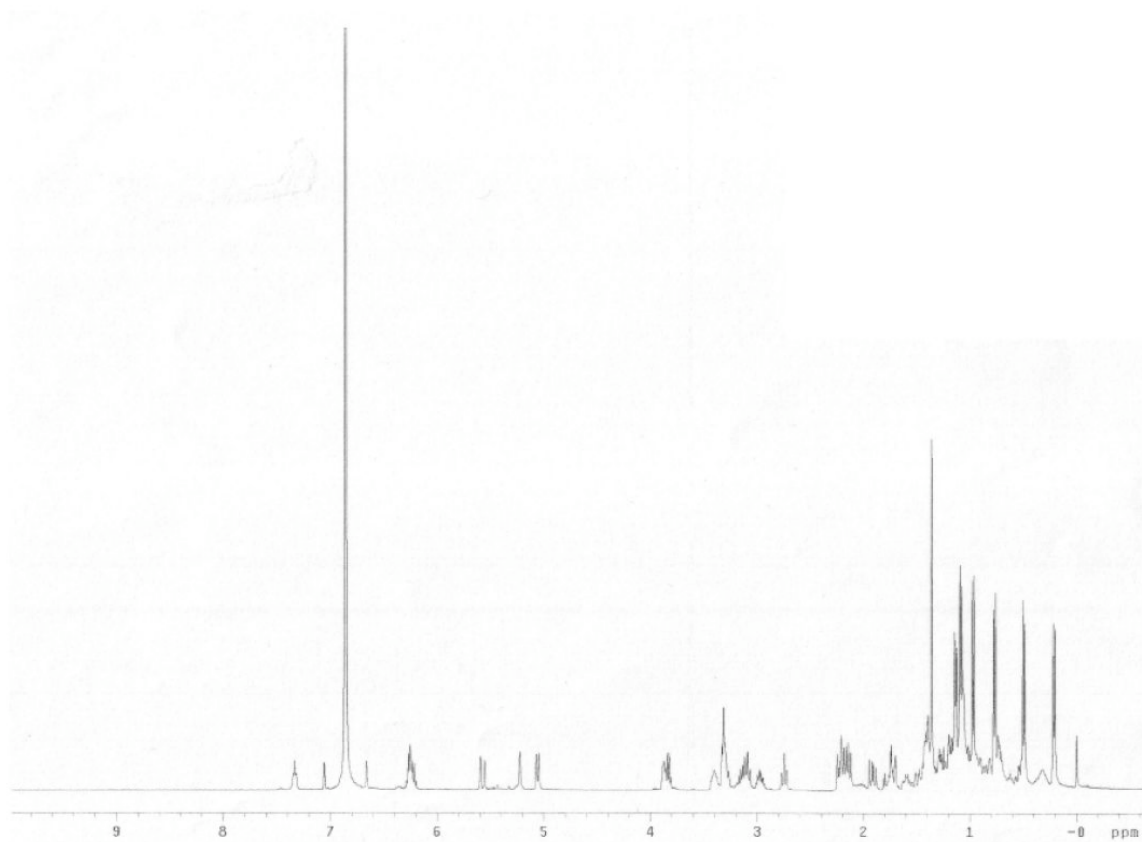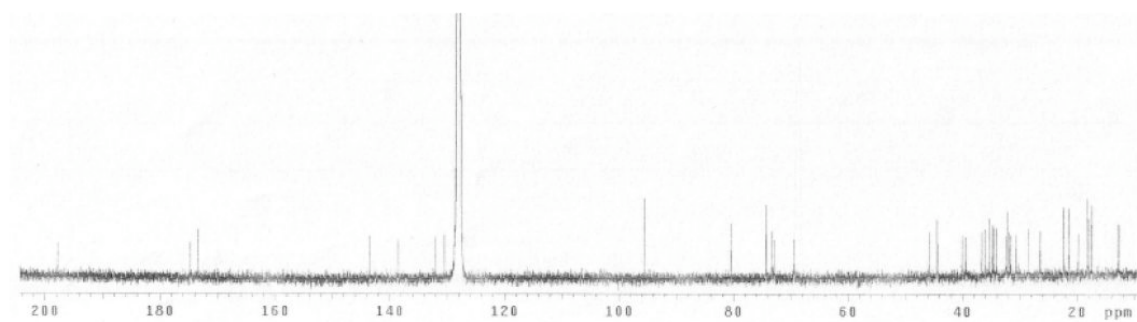

Synthesis of a 35-Member Stereoisomer Library of Bistramide A: Evaluation of Effects on Actin State, Cell Cycle and Tumor Cell Growth

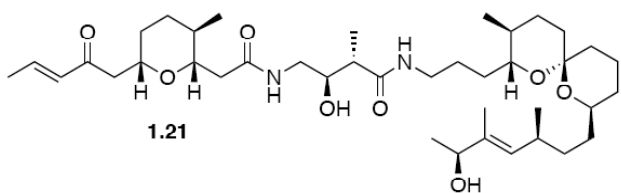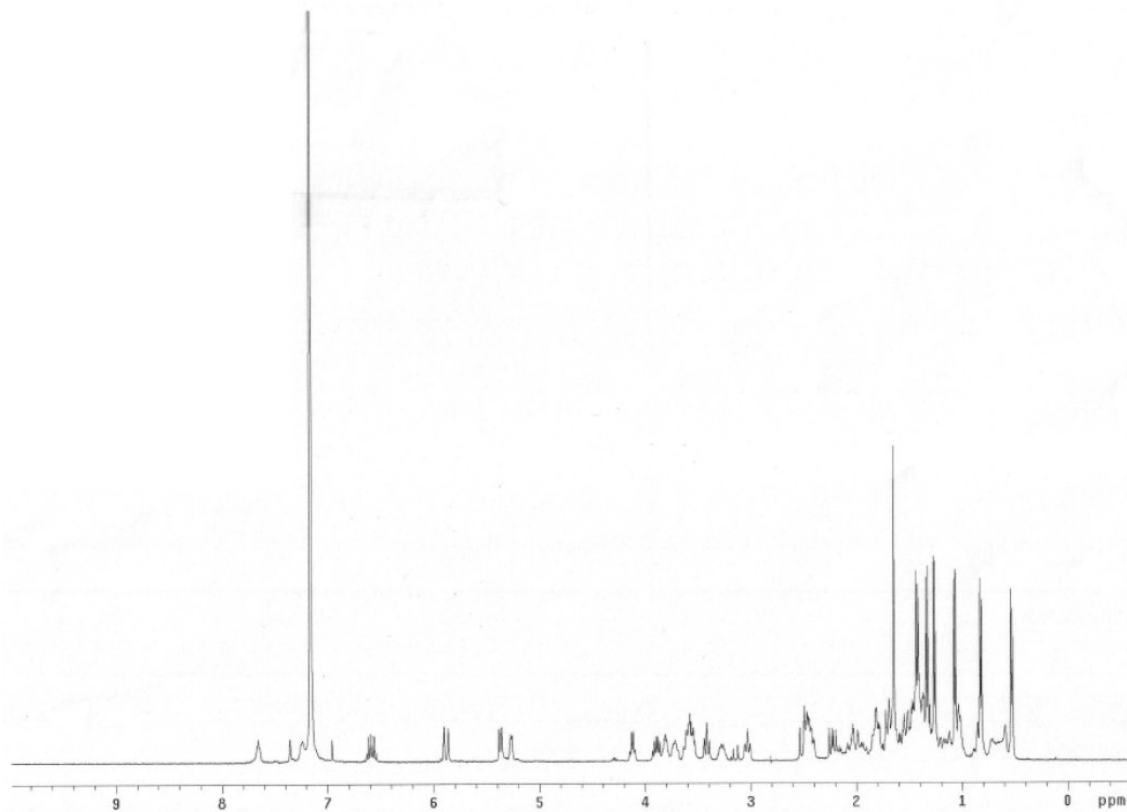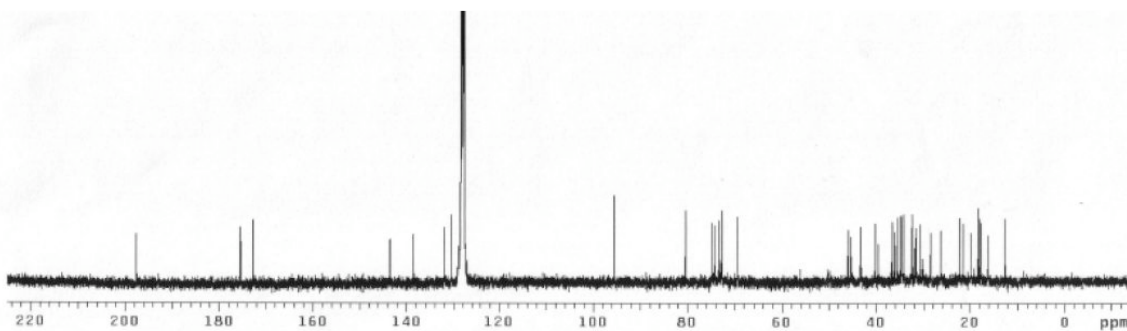

Synthesis of a 35-Member Stereoisomer Library of Bistramide A: Evaluation of Effects on Actin State, Cell Cycle and Tumor Cell Growth

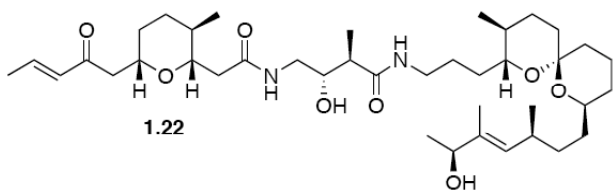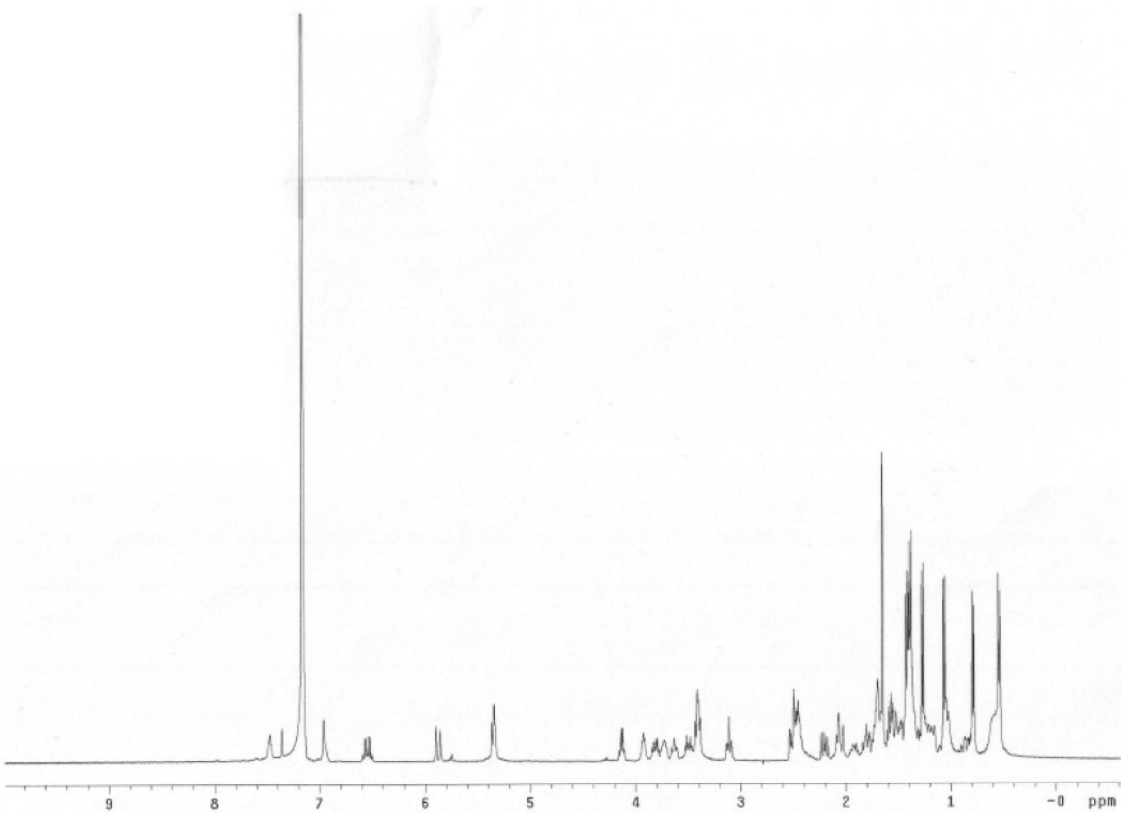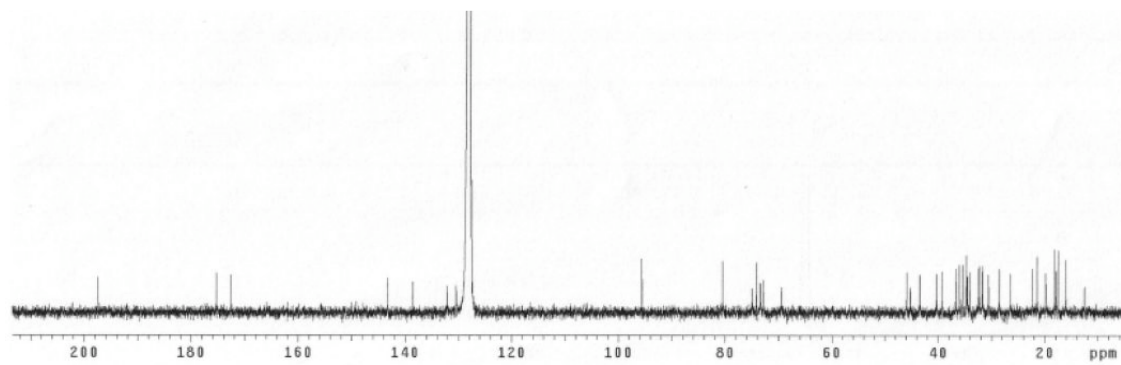

Synthesis of a 35-Member Stereoisomer Library of Bistramide A: Evaluation of Effects on Actin State, Cell Cycle and Tumor Cell Growth

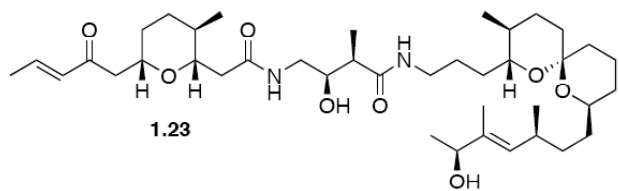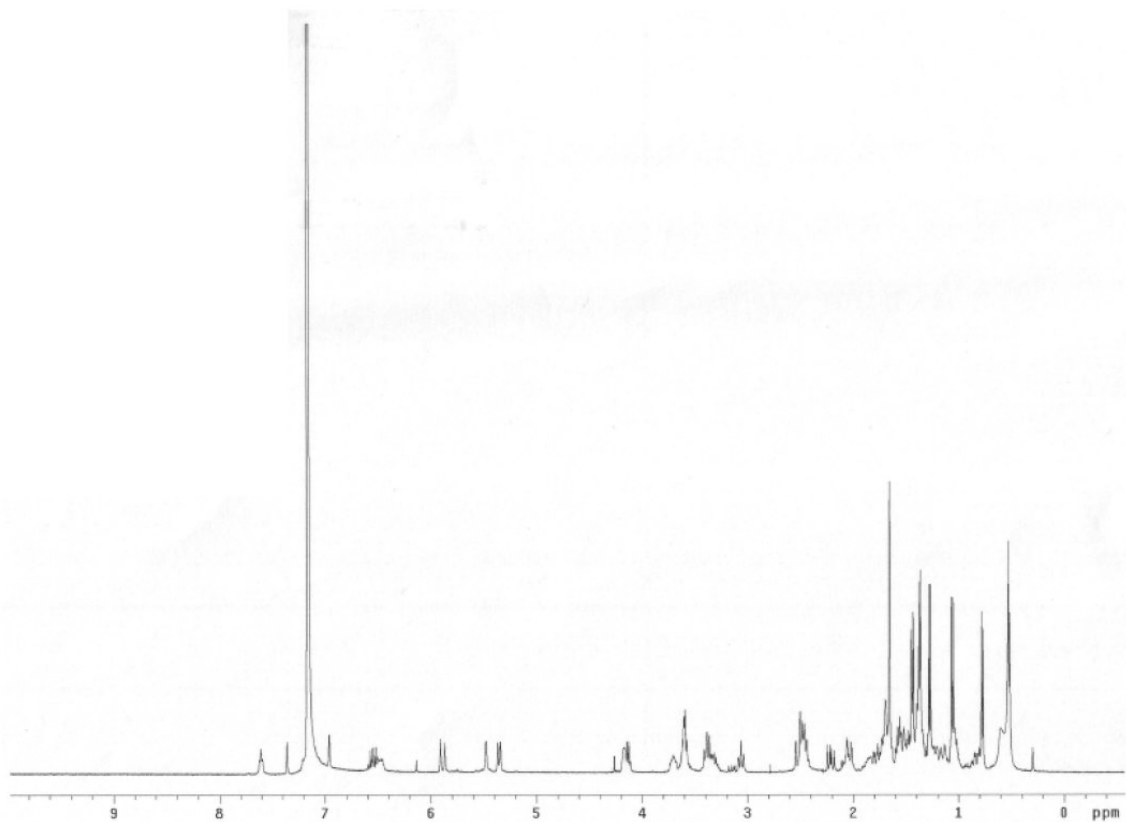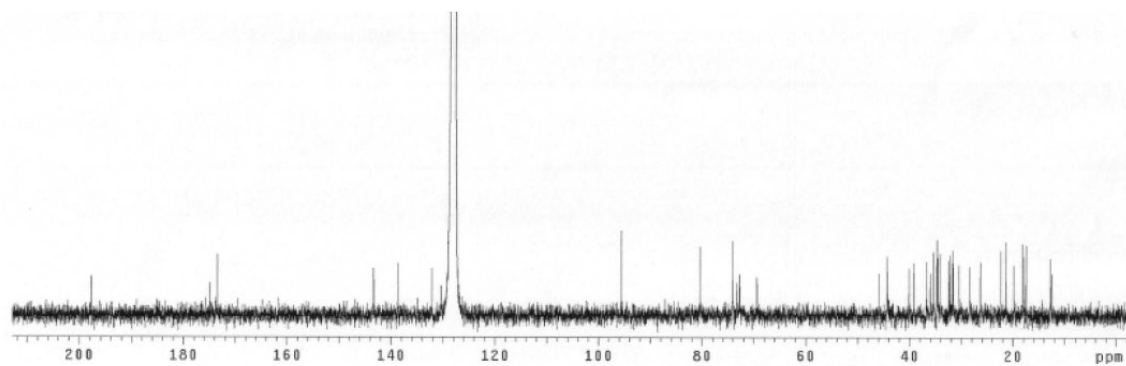

Synthesis of a 35-Member Stereoisomer Library of Bistramide A: Evaluation of Effects on Actin State, Cell Cycle and Tumor Cell Growth

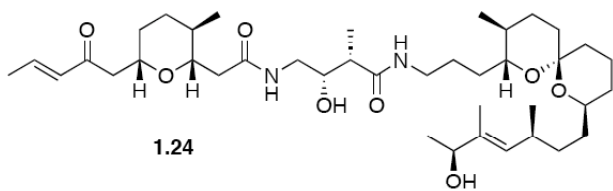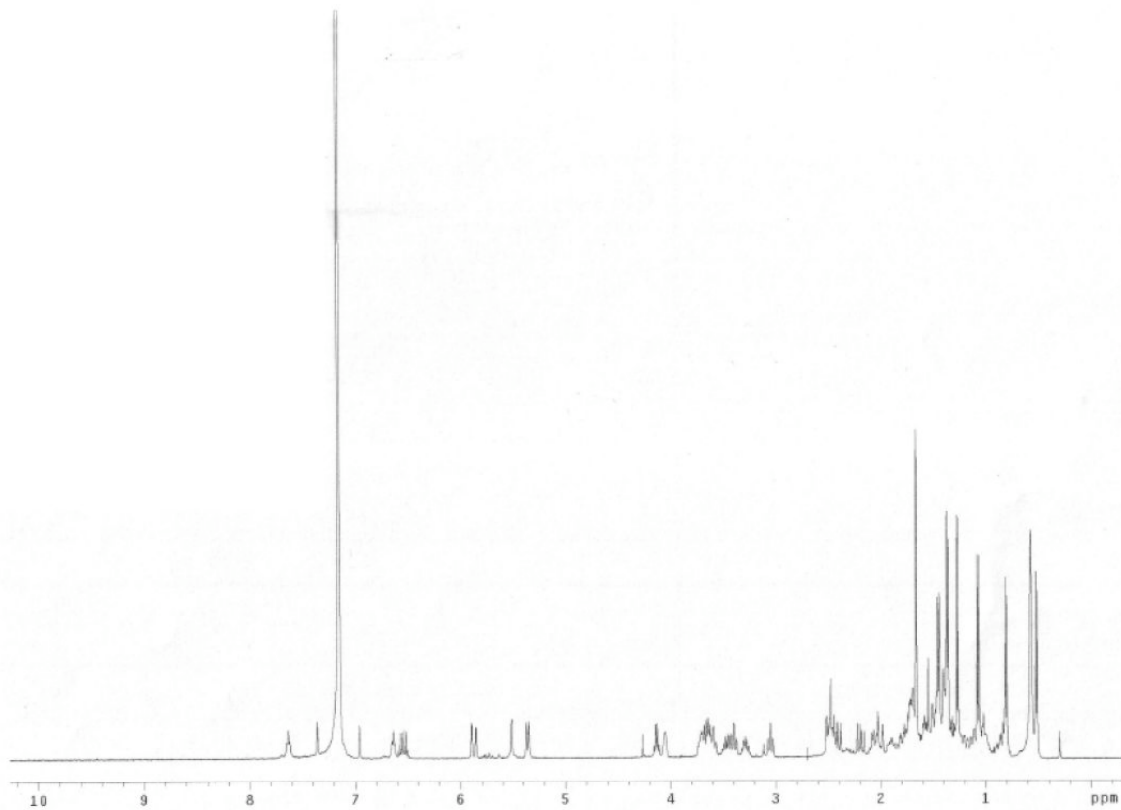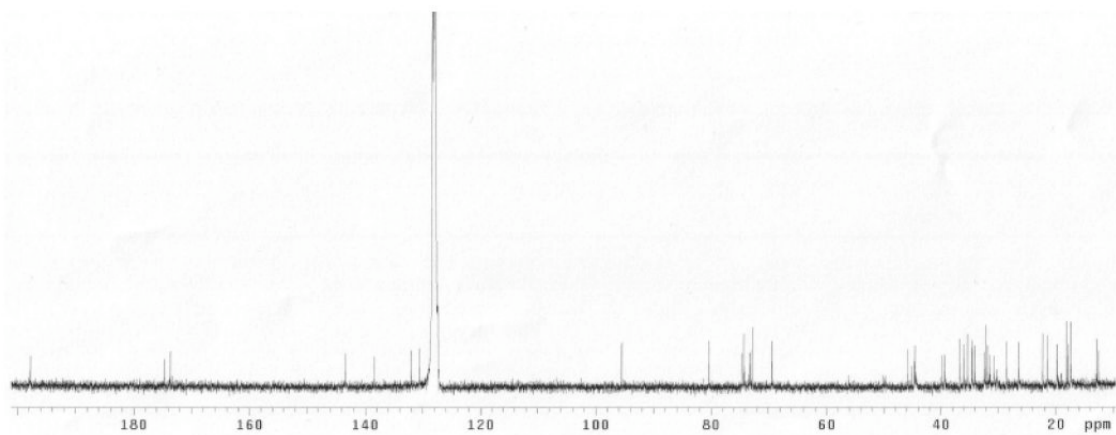



Synthesis of a 35-Member Stereoisomer Library of Bistramide A: Evaluation of Effects on Actin State, Cell Cycle and Tumor Cell Growth

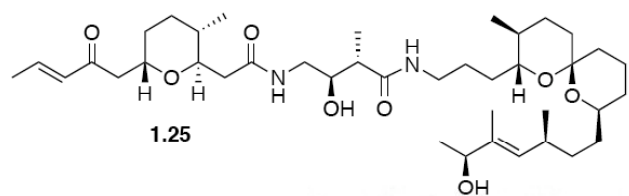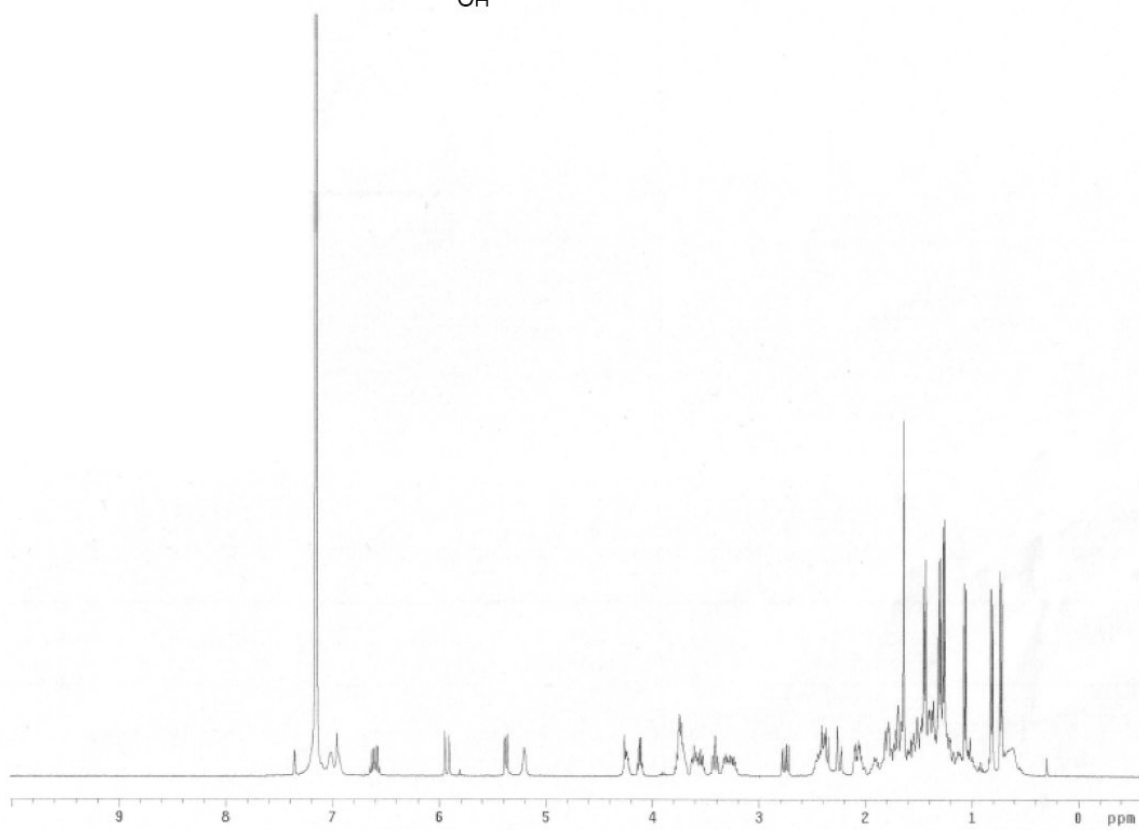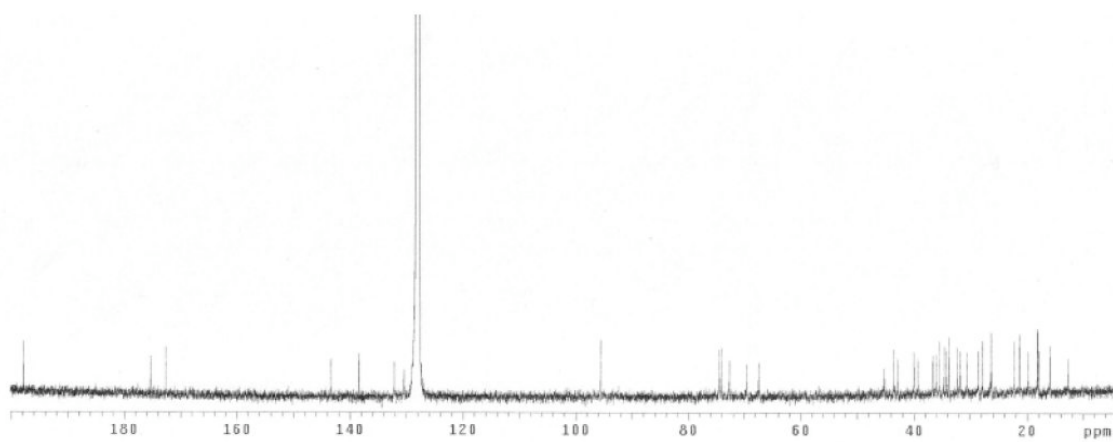

Synthesis of a 35-Member Stereoisomer Library of Bistramide A: Evaluation of Effects on Actin State, Cell Cycle and Tumor Cell Growth

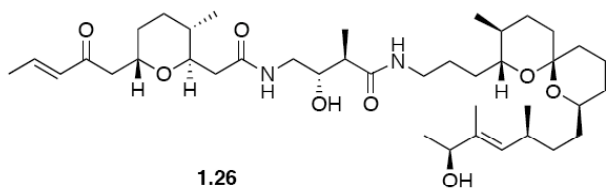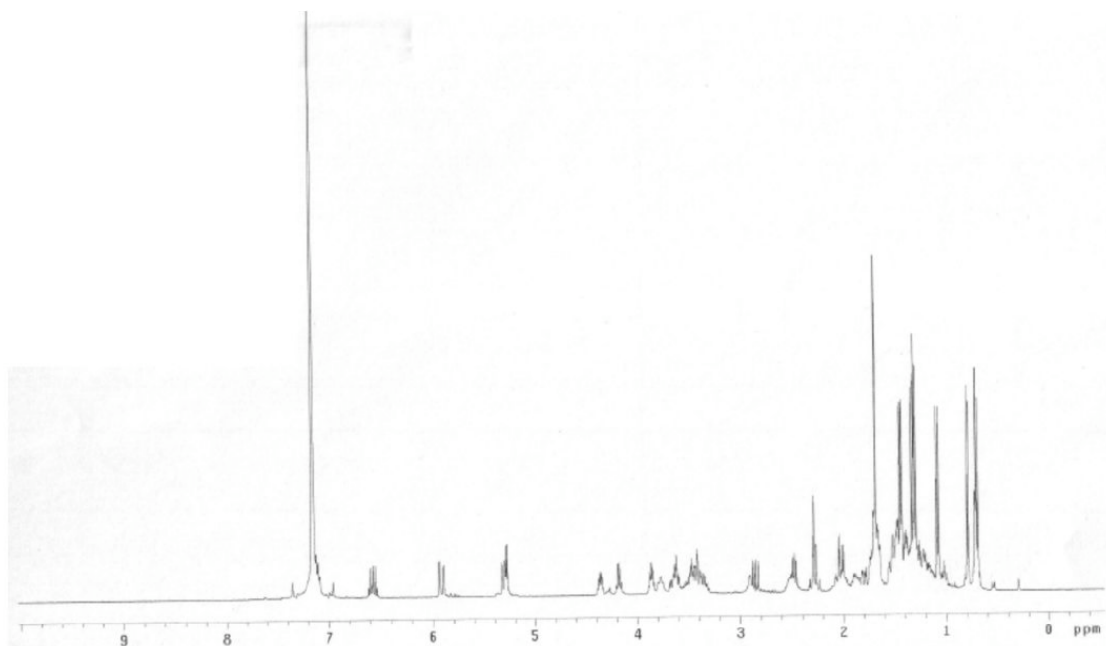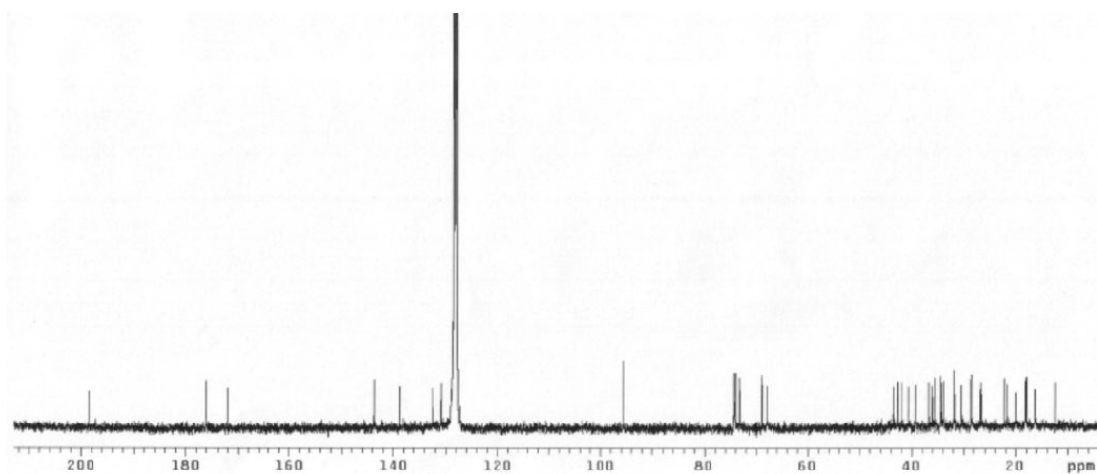

Synthesis of a 35-Member Stereoisomer Library of Bistramide A: Evaluation of Effects on Actin State, Cell Cycle and Tumor Cell Growth

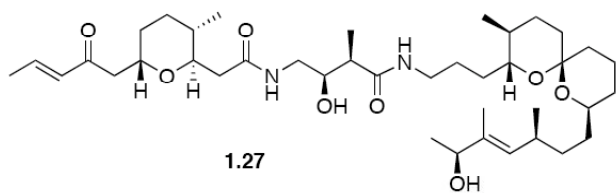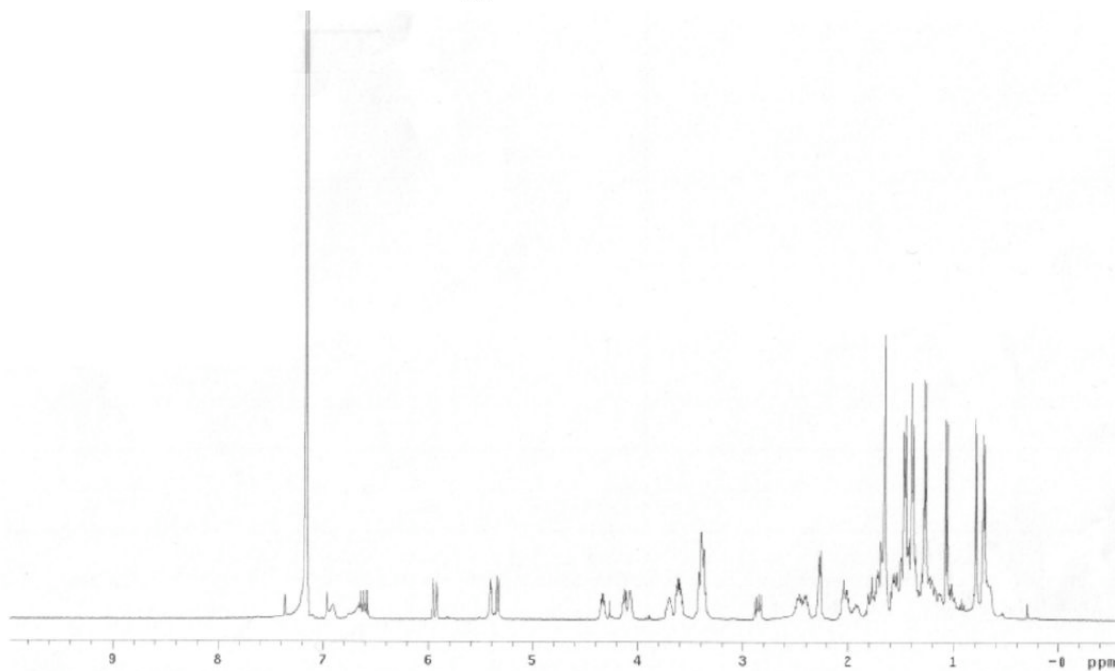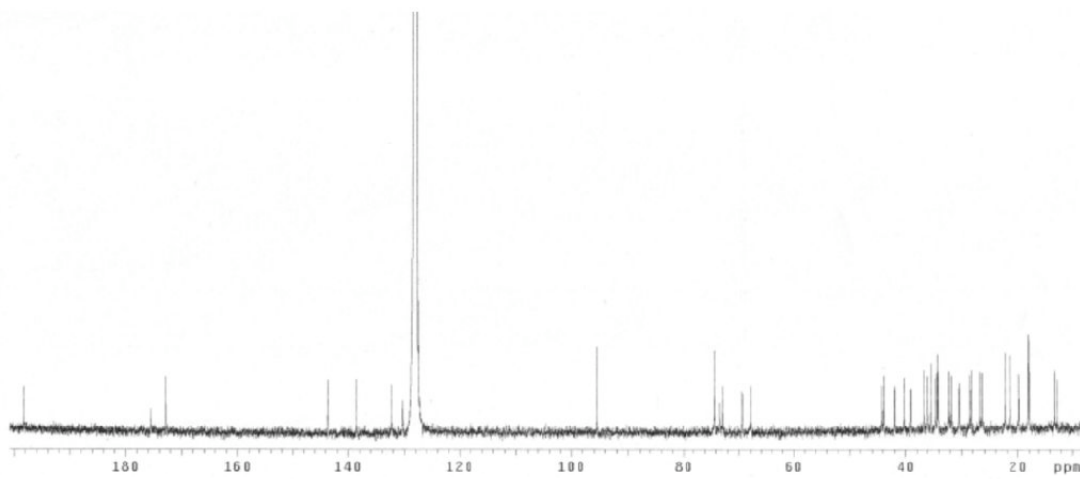

Synthesis of a 35-Member Stereoisomer Library of Bistramide A: Evaluation of Effects on Actin State, Cell Cycle and Tumor Cell Growth

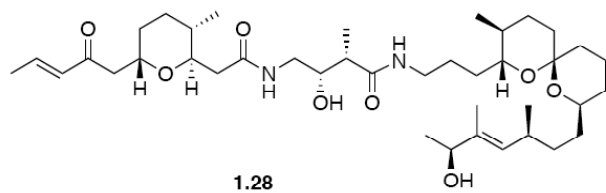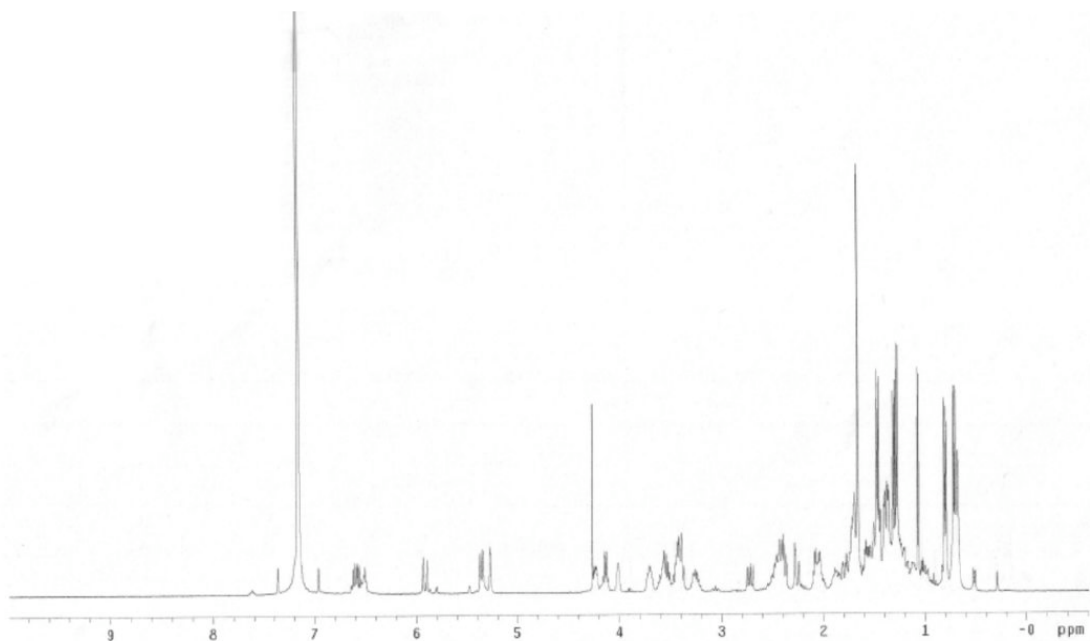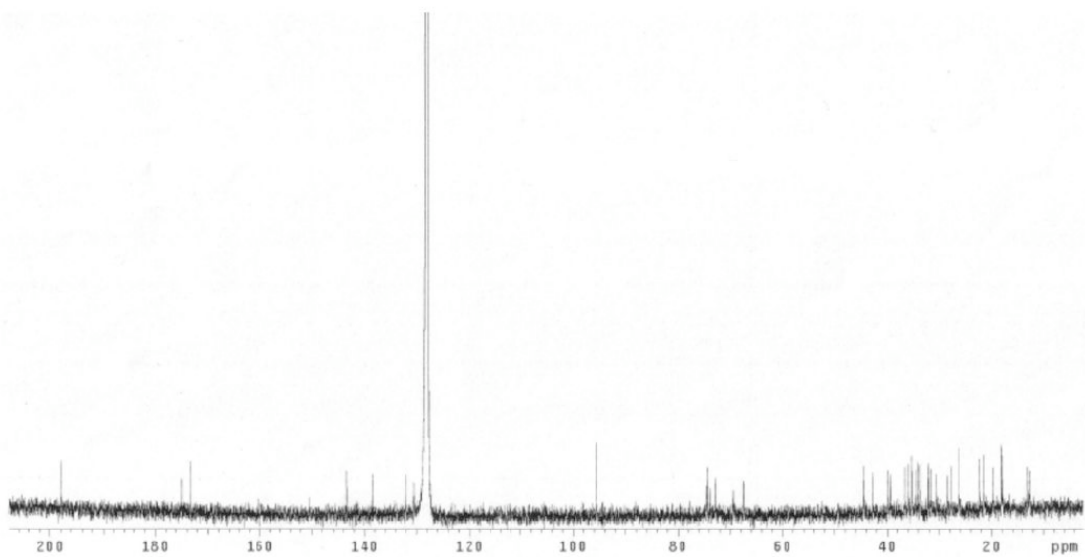

Synthesis of a 35-Member Stereoisomer Library of Bistramide A: Evaluation of Effects on Actin State, Cell Cycle and Tumor Cell Growth

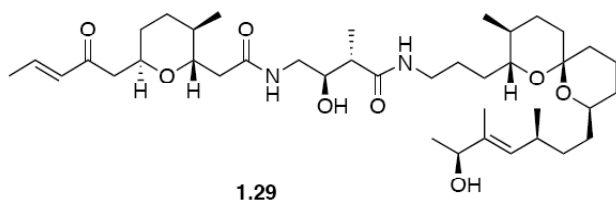

1.29

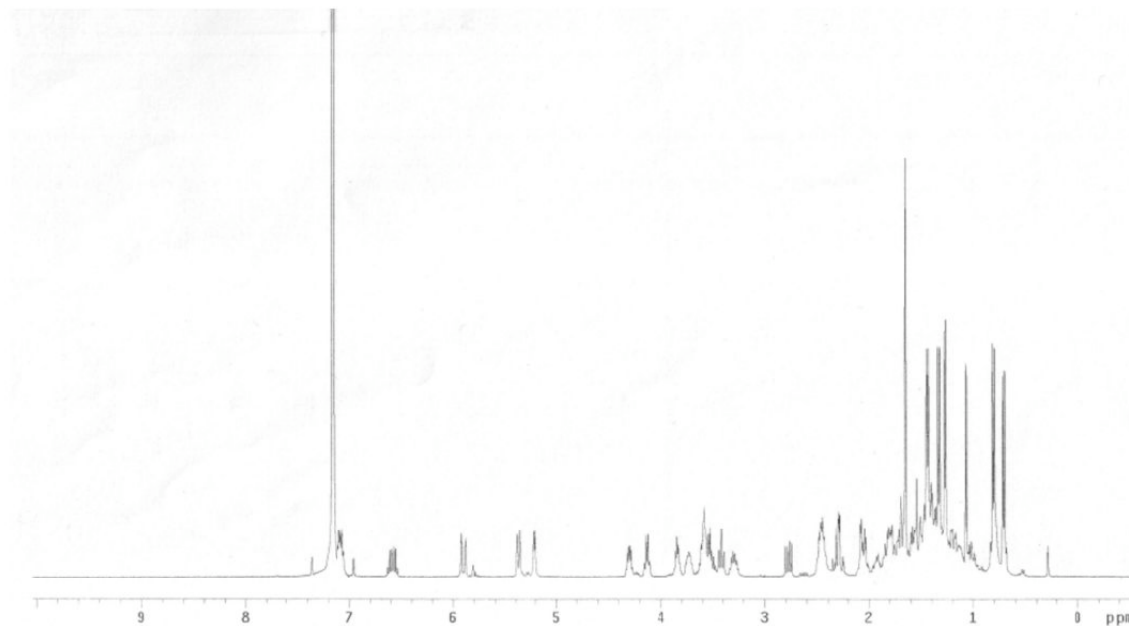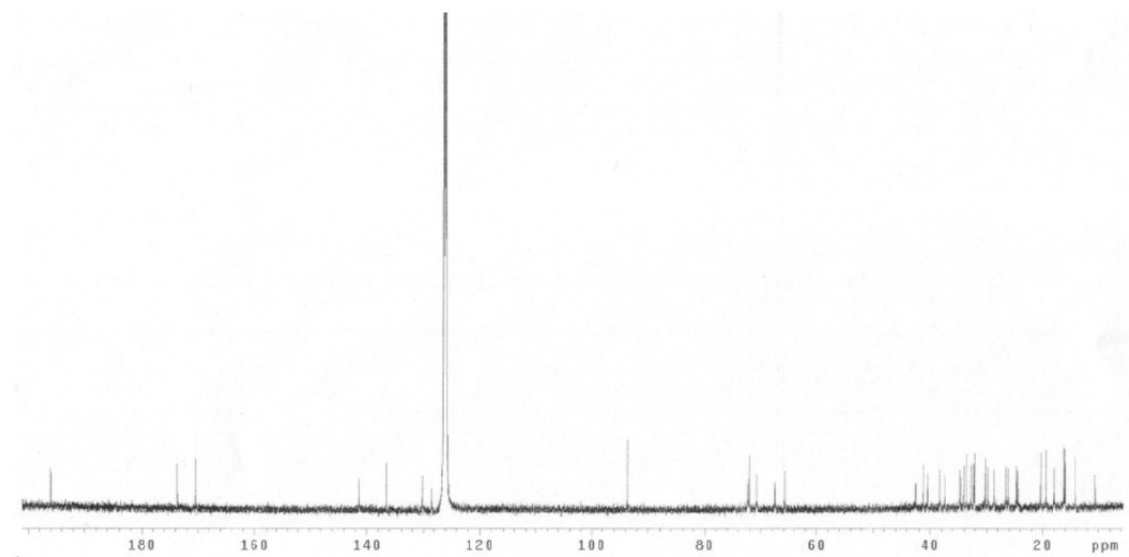

Synthesis of a 35-Member Stereoisomer Library of Bistramide A: Evaluation of Effects on Actin State, Cell Cycle and Tumor Cell Growth

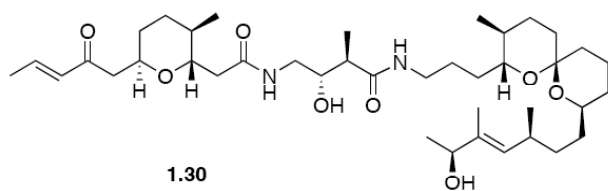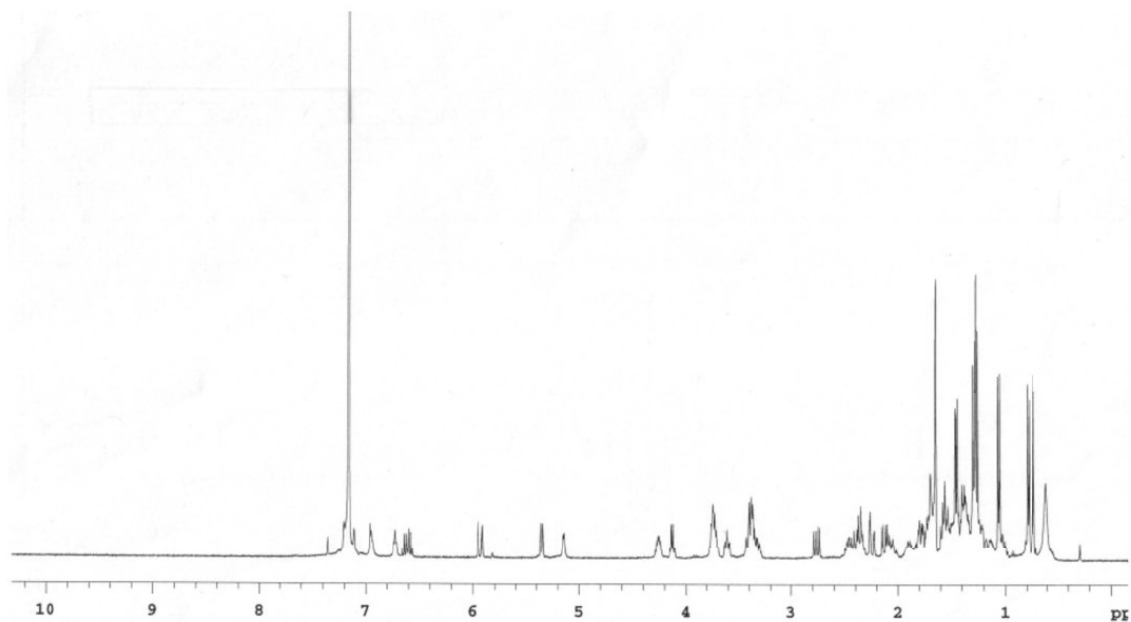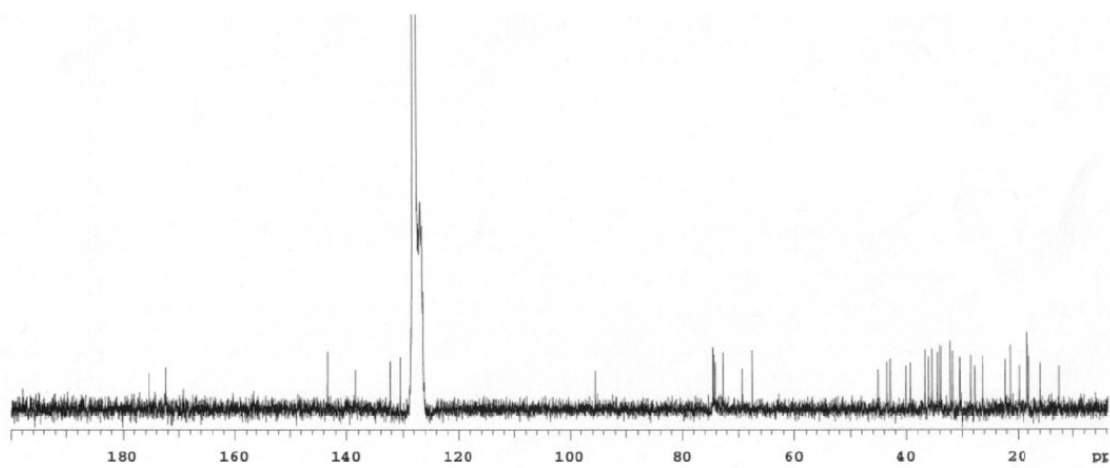

Synthesis of a 35-Member Stereoisomer Library of Bistramide A: Evaluation of Effects on Actin State, Cell Cycle and Tumor Cell Growth

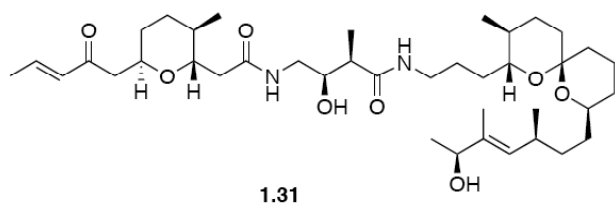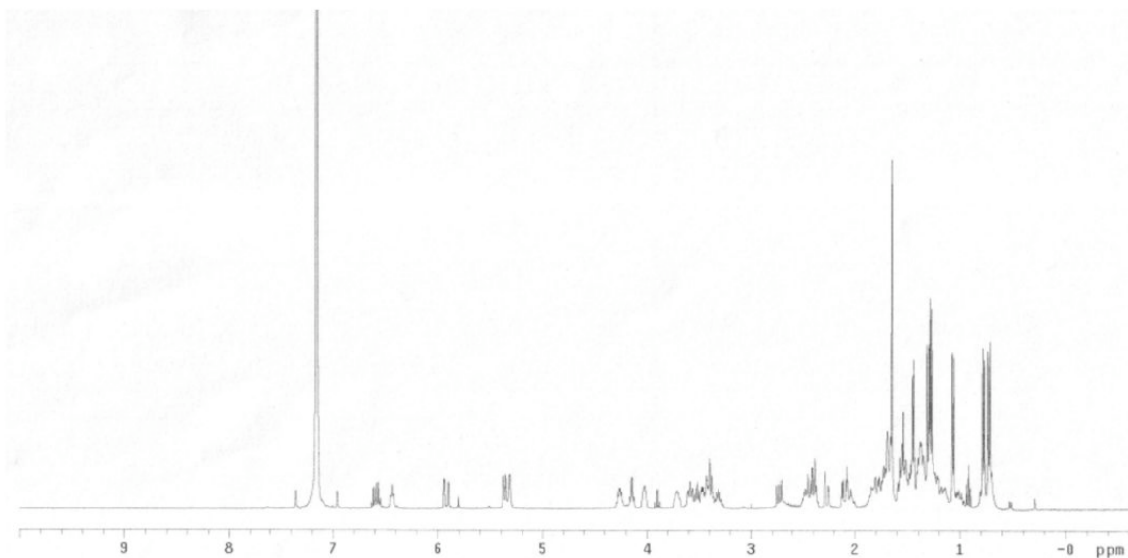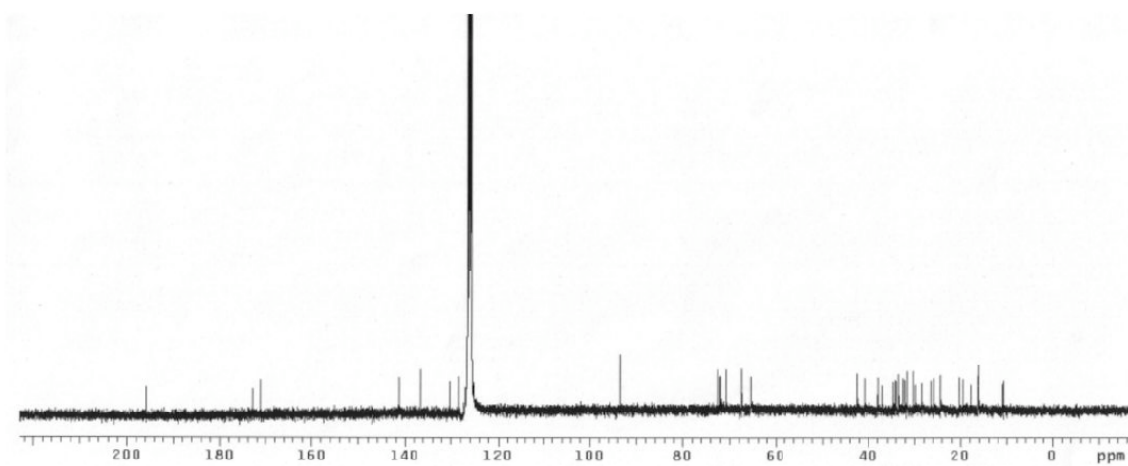

Synthesis of a 35-Member Stereoisomer Library of Bistramide A: Evaluation of Effects on Actin State, Cell Cycle and Tumor Cell Growth

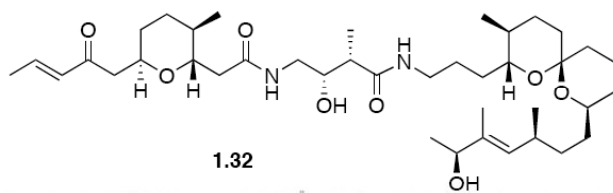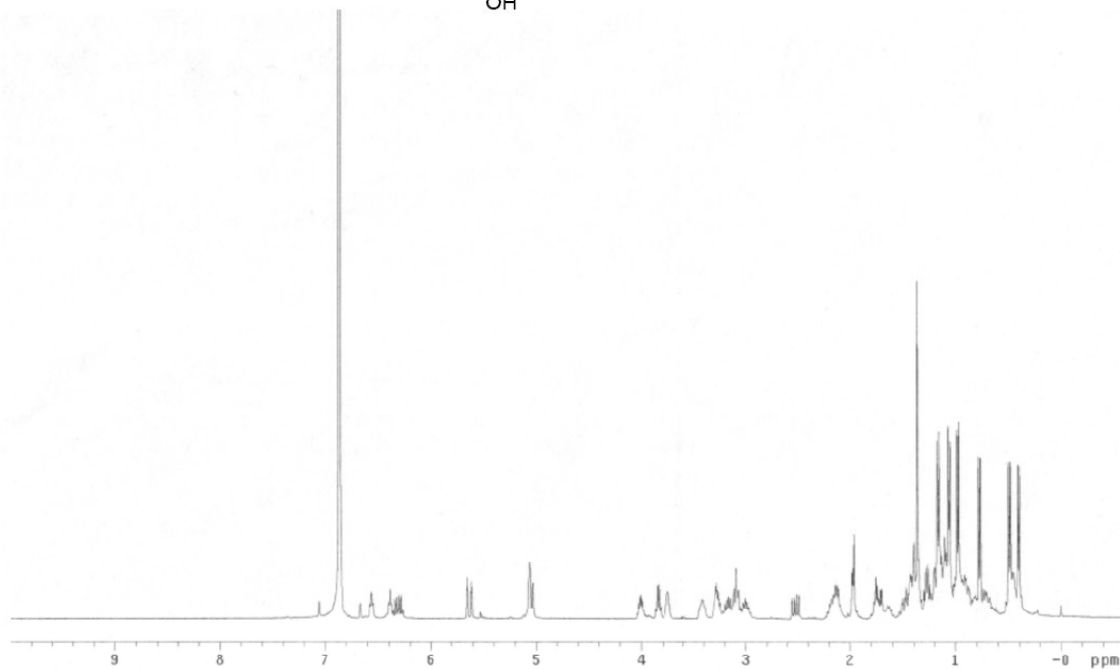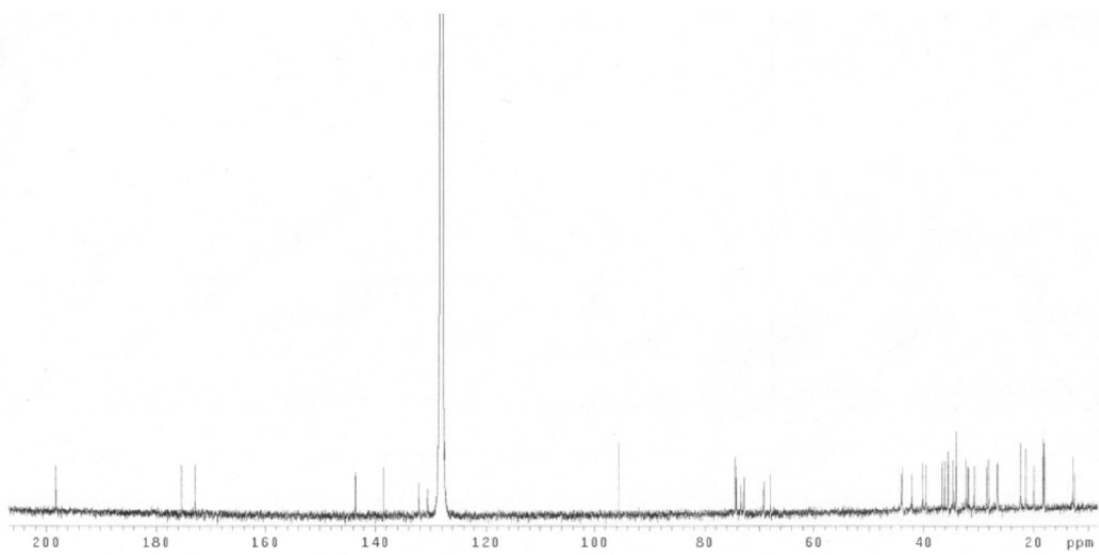



Synthesis of a 35-Member Stereoisomer Library of Bistramide A: Evaluation of Effects on Actin State, Cell Cycle and Tumor Cell Growth

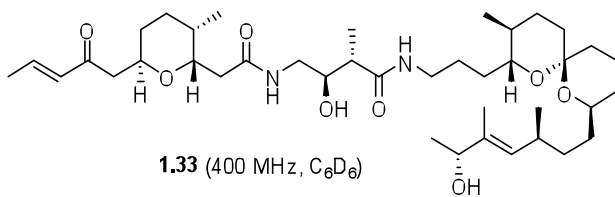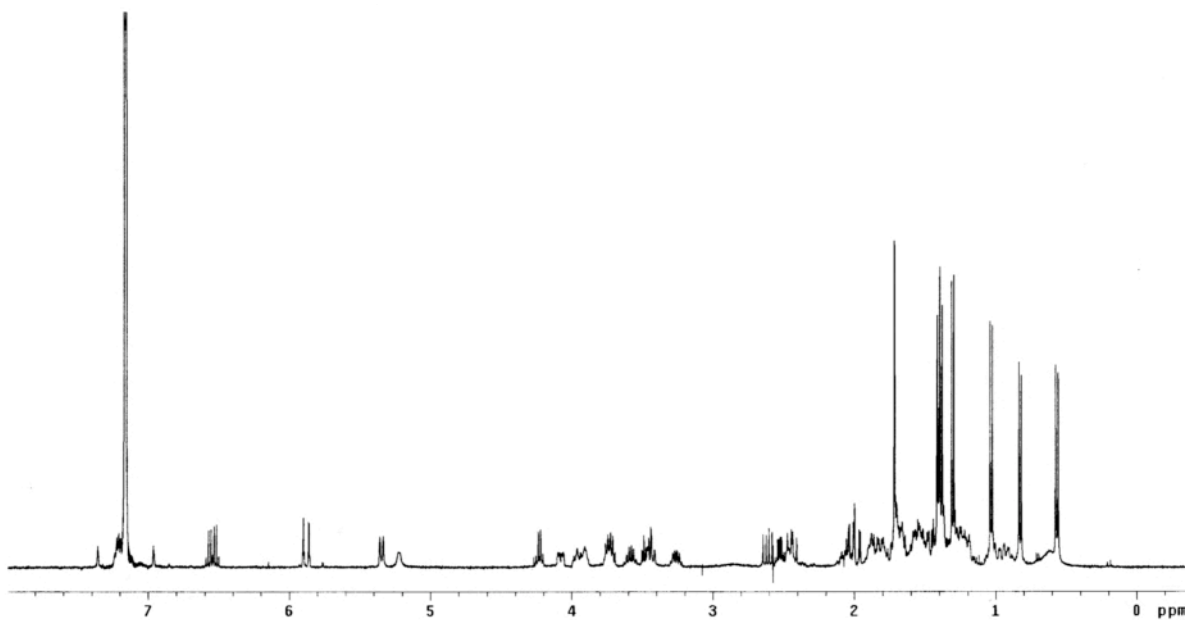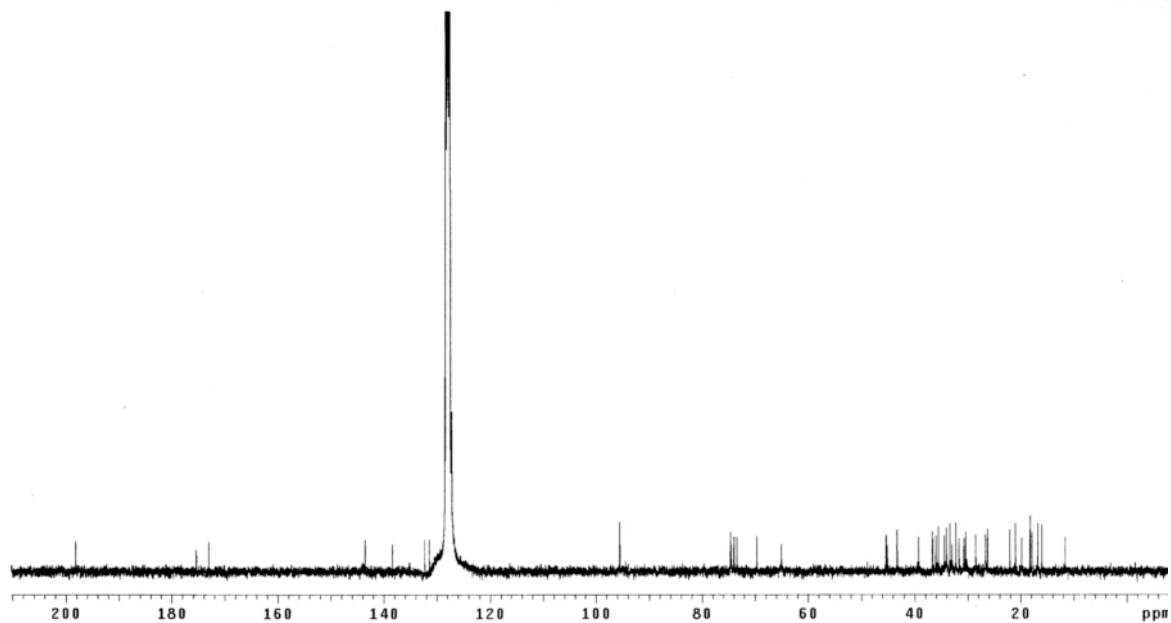

Synthesis of a 35-Member Stereoisomer Library of Bistramide A: Evaluation of Effects on Actin State, Cell Cycle and Tumor Cell Growth

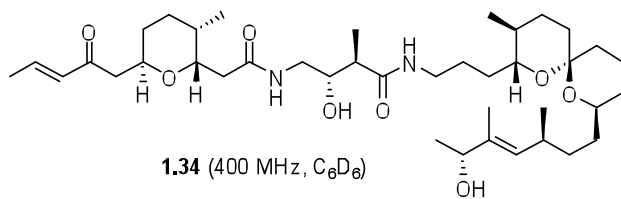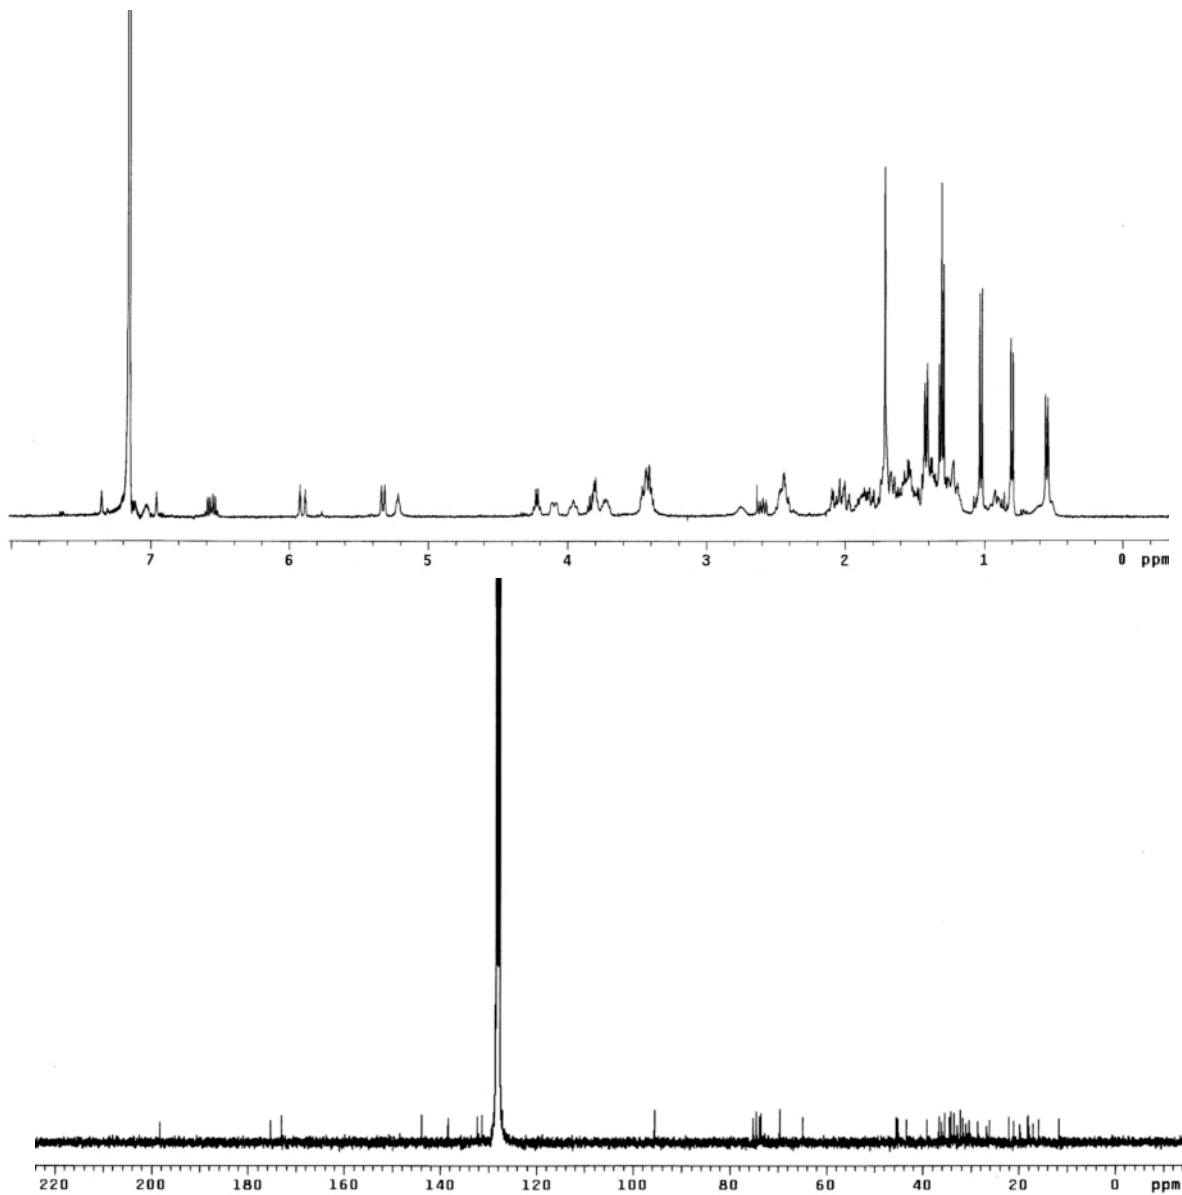

Synthesis of a 35-Member Stereoisomer Library of Bistramide A: Evaluation of Effects on Actin State, Cell Cycle and Tumor Cell Growth

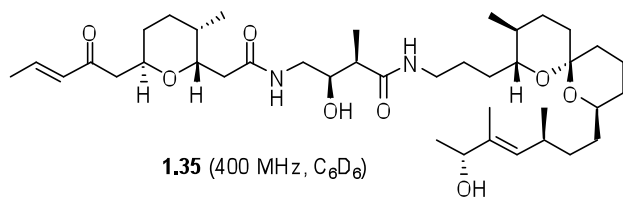

1.35 (400 MHz, C<sub>6</sub>D<sub>6</sub>)

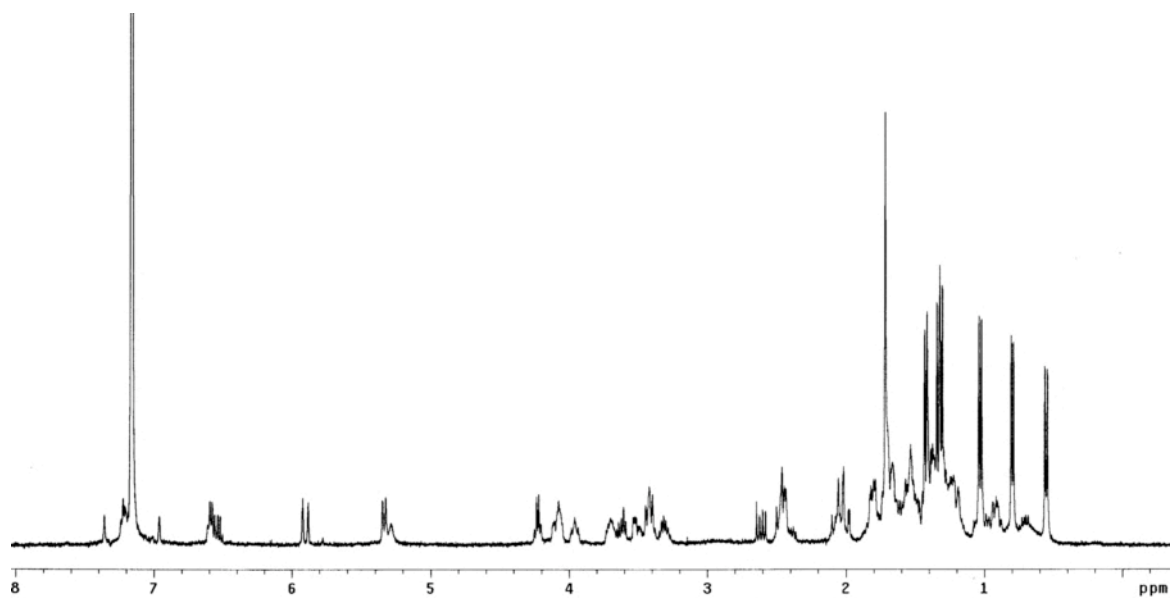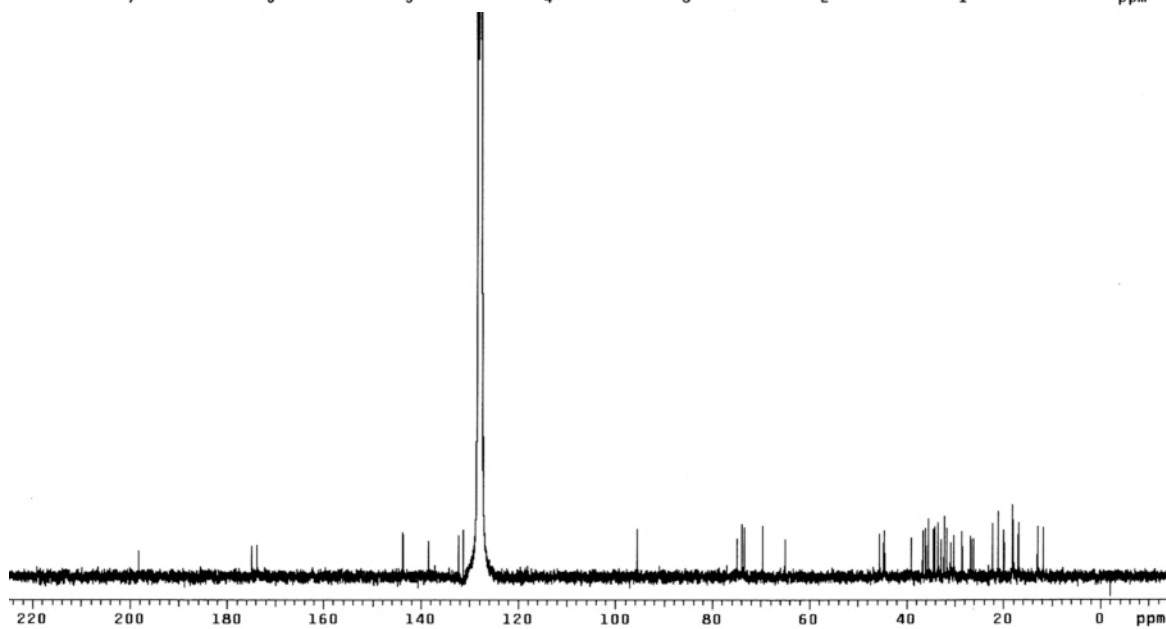

Synthesis of a 35-Member Stereoisomer Library of Bistramide A: Evaluation of Effects on Actin State, Cell Cycle and Tumor Cell Growth

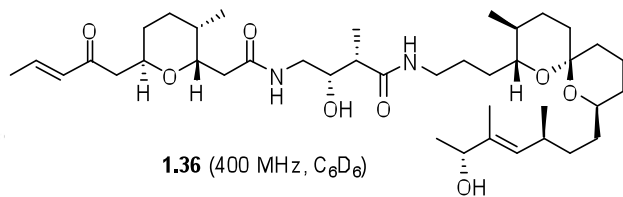

1.36 (400 MHz, C<sub>6</sub>D<sub>6</sub>)

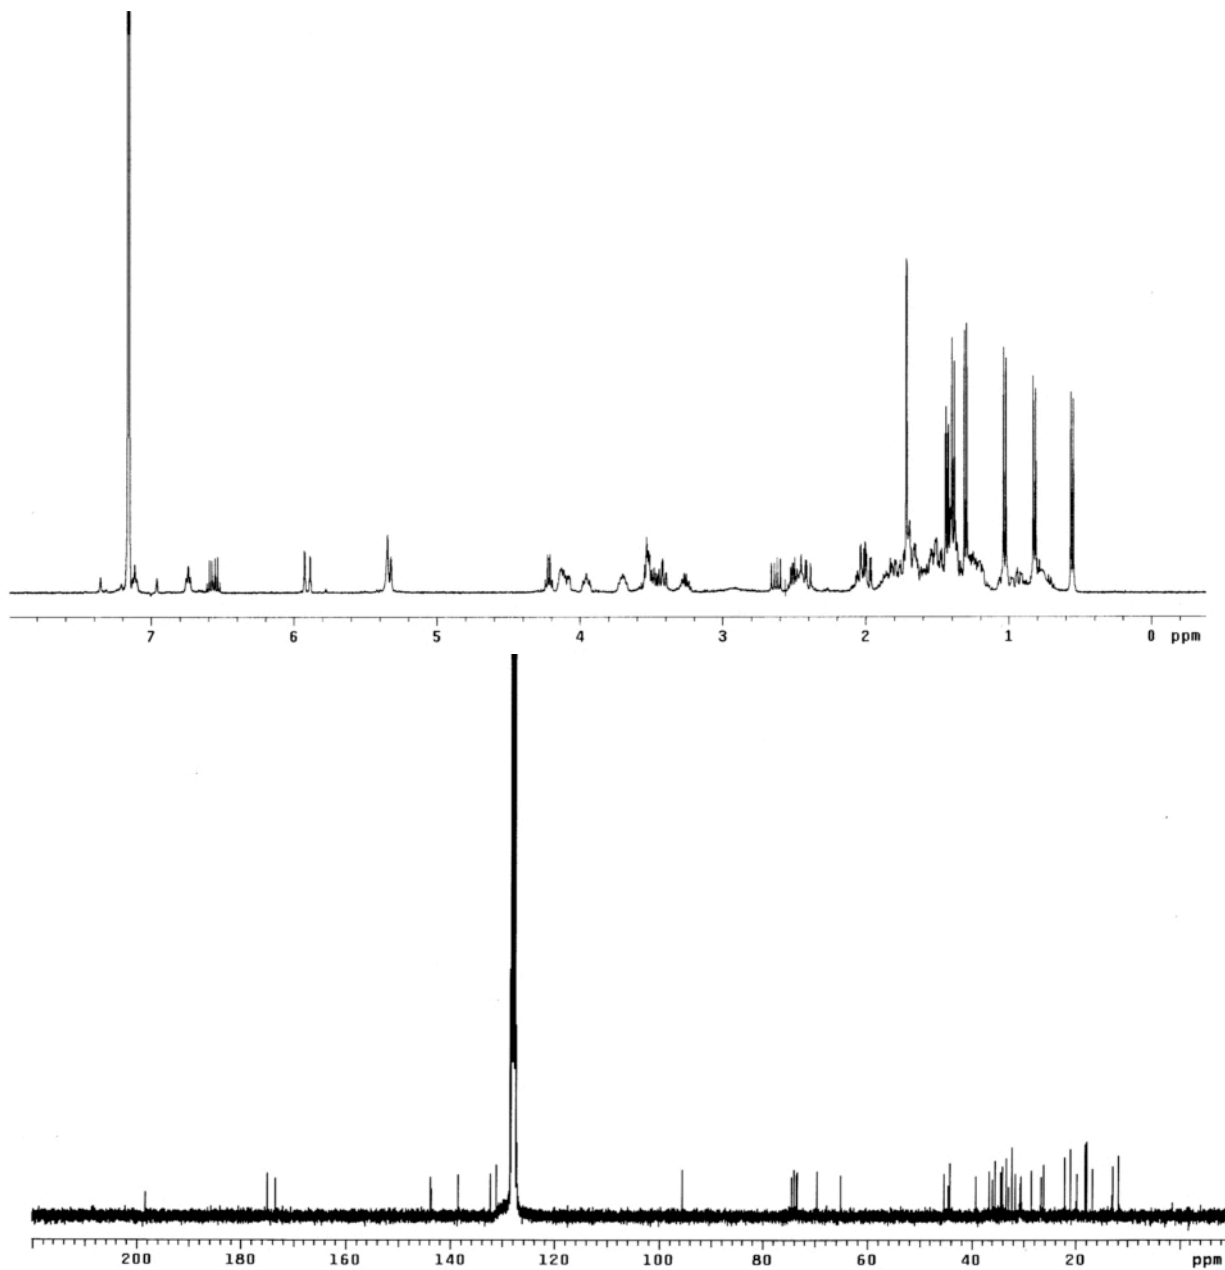

Supplement: NIHMS93018-supplement-1_si_001.pdf [file NIHMS93018-supplement-1_si_001.pdf]
